# Supplementary material for: Analysis of Host Gene Expression Profile in HIV-1 and HIV-2 Infected T-Cells
Source: PLoS One. 2016 Jan 28;11(1):e0147421. doi: 10.1371/journal.pone.0147421 (PMC4731573; doi:10.1371/journal.pone.0147421)
Supplement: S1 File — (XLS) [file pone.0147421.s001.xls]

## Sheet: Sheet1
S1_File.Xls
# Fold-Change cut-off: 1.5 # P-value cut-off: 0.05 # Condition pairs: Test 3 (PBMC + HIV-1 MN Day 7) vs Control 1 (No virus control day 7) # Column A: ProbeName, it represents probe name. # Column B: P-value, P-value calculated from paired t-test. # Column C: Fold change, the absolute ratio (no log scale) of normalized intensities between two conditions. # Column D: Regulation, it depicts which g…
Test 3 (PBMC + HIV-1 MN Day &) vs Control 1 (No virus control day 7) 1.5 fold up regulated genes
	P-value	Fold change and Regulation		Group--Raw Intensity		Group--Normalized Intensity		Raw Intensity						Normalized Intensity						Annotations
ProbeName	P-value	FCAbsolute	regulation	Test 3(raw)	Control 1(raw)	Test 3(normalized)	Control 1(normalized)	[22-17, Control 1](raw)	[22-37, Test 3](raw)	[43-17, Control 1](raw)	[43-37, Test 3](raw)	[P1-7, Control 1](raw)	[P3-7, Test 3](raw)	[22-17, Control 1](normalized)	[22-37, Test 3](normalized)	[43-17, Control 1](normalized)	[43-37, Test 3](normalized)	[P1-7, Control 1](normalized)	[P3-7, Test 3](normalized)	GenbankAccession	GenomicCoordinates	GeneSymbol	Description	Go	RefSeqAccession	UniGeneID	EntrezGeneID	EnsemblID	TIGRID
A_23_P321160	0.0270285	2.00674	up	144.536	55.3346	6.85202	5.84717	82.8594	198.745	26.1841	135.497	56.9603	99.3646	6.17051	7.42907	5.89146	6.96193	5.47954	6.16507	NM_032530	chr17:005082968-005082909	ZNF594	Homo sapiens zinc finger protein 594 (ZNF594), mRNA [NM_032530]	GO:0005622|GO:0008270|GO:0005634|GO:0003677|GO:0046872|GO:0045449	NM_032530	Hs.658402	84622	ENST00000399604
A_23_P122863	0.0124427	2.64431	up	205.916	73.8624	7.06625	5.66335	63.0886	159.121	11.2529	79.0707	147.245	379.556	5.76671	7.16266	4.50914	6.18904	6.71421	7.84703	NM_001001555	chr7:050660395-050660337	GRB10	Homo sapiens growth factor receptor-bound protein 10 (GRB10), transcript variant 4, mRNA [NM_001001555]	GO:0005515|GO:0007165|GO:0005737|GO:0005886|GO:0046627|GO:0005158|GO:0005070|GO:0046325|GO:0007267|GO:0048009	NM_001001555	Hs.164060	2887	ENST00000402497
A_23_P120316	0.007062	1.8818	up	14590	8865.98	13.4354	12.5233	14147.9	17913.5	624.16	5845.31	11825.8	20011.3	13.204	13.9758	11.3784	12.4158	12.9876	13.9148	NM_006636	chr2:074441985-074442044	MTHFD2	Homo sapiens methylenetetrahydrofolate dehydrogenase (NADP+ dependent) 2, methenyltetrahydrofolate cyclohydrolase (MTHFD2), nuclear gene encoding mitochondrial protein, transcript variant 1, mRNA [NM_006636]	GO:0000287|GO:0004477|GO:0005739|GO:0004488|GO:0004487|GO:0016787|GO:0005488|GO:0042301|GO:0016491|GO:0046653|GO:0009396|GO:0006730|GO:0055114	NM_006636	Hs.469030	10797	ENST00000409601
A_23_P34915	0.0442499	3.43997	up	4257.64	1590.72	11.0626	9.28019	592.365	3132.09	72.5517	812.377	4107.24	8828.44	8.68168	11.2024	7.77926	9.39889	11.3796	12.5864	NM_001040619	chr1:212793856-212793915	ATF3	Homo sapiens activating transcription factor 3 (ATF3), transcript variant 4, mRNA [NM_001040619]	GO:0043565|GO:0008284|GO:0006355|GO:0003700|GO:0003714|GO:0046983|GO:0006094|GO:0005730|GO:0005634|GO:0042802	NM_001040619	Hs.460	467	ENST00000366987	NP1205356
A_33_P3619171	0.0316617	1.95541	up	2006.93	808.431	10.4345	9.46706	1536.94	2655.19	214.813	1614.94	673.544	1750.65	9.94008	10.9628	9.7331	10.3712	8.72799	9.96951	NM_021127	chr18:057570691-057570750	PMAIP1	Homo sapiens phorbol-12-myristate-13-acetate-induced protein 1 (PMAIP1), mRNA [NM_021127]	GO:0005739|GO:0005515|GO:0043331|GO:0006919|GO:0001836|GO:0006926|GO:0006917|GO:0006921	NM_021127	Hs.96	5366	ENST00000269518
A_23_P101093	0.0397952	1.79656	up	297.319	157.757	7.68091	6.83567	220.653	322.462	24.5185	135.358	228.099	434.136	7.45381	8.05655	5.77881	6.96108	7.2744	8.0251	NM_016429	chr17:046103842-046103783	COPZ2	Homo sapiens coatomer protein complex, subunit zeta 2 (COPZ2), mRNA [NM_016429]	GO:0005515|GO:0005801|GO:0030126|GO:0005737|GO:0005794|GO:0016020|GO:0031410|GO:0016192|GO:0006886|GO:0030117	NM_016429	Hs.408434	51226	ENST00000006101
A_24_P280113	0.0367333	1.53144	up	2563.83	1854.82	9.9111	9.29622	267.951	412.889	103.849	721.651	5192.67	6556.94	7.69771	8.36327	8.44842	9.24328	11.7425	12.1268	NM_001560	chrX:117928406-117928465	IL13RA1	Homo sapiens interleukin 13 receptor, alpha 1 (IL13RA1), mRNA [NM_001560]	GO:0005515|GO:0005886|GO:0030890|GO:0002639|GO:0016515|GO:0005898|GO:0004872|GO:0016021|GO:0007166	NM_001560	Hs.496646	3597	ENST00000371637
A_33_P3280927	0.0299241	1.53209	up	1552.33	859.454	9.99991	9.38441	1251.77	1871.34	140.973	812.518	1185.62	1973.14	9.65896	10.4337	8.99316	9.40026	9.50112	10.1658	NR_024542	chr9:139619106-139619047	SNHG7	Homo sapiens small nucleolar RNA host gene 7 (non-protein coding) (SNHG7), transcript variant 2, non-coding RNA [NR_024542]		NR_024542		84973
A_23_P152838	0.0113229	2.00747	up	45275.3	25711	15.1843	14.1789	26970	35713.5	2717.78	22526.6	47445.1	77585.9	14.1805	15.0944	13.298	14.5183	15.0582	15.9401	NM_002985	chr17:034199391-034199332	CCL5	Homo sapiens chemokine (C-C motif) ligand 5 (CCL5), mRNA [NM_002985]	GO:0007267|GO:0006928|GO:0006887|GO:0005615|GO:0031622|GO:0006955|GO:0005737|GO:0006935|GO:0032496|GO:0004871|GO:0007155|GO:0006979|GO:0045071|GO:0008009|GO:0032868|GO:0042493|GO:0007568|GO:0006874|GO:0045672|GO:0051384|GO:0005625|GO:0005576|GO:0002544|GO:0009615|GO:0042056|GO:0007165|GO:0006968|GO:0007186|GO:0048247|GO:0034612	NM_002985	Hs.514821	6352	ENST00000293272
A_24_P413126	0.0189441	1.76856	up	274.852	124.703	7.66409	6.84151	97.4539	167.443	44.3014	257.72	232.354	399.392	6.39866	7.22179	6.82787	7.84911	7.298	7.92137	NM_020182	chr20:056223548-056223489	PMEPA1	Homo sapiens prostate transmembrane protein, androgen induced 1 (PMEPA1), transcript variant 1, mRNA [NM_020182]	GO:0005515|GO:0003674|GO:0005886|GO:0050699|GO:0016021|GO:0030521	NM_020182	Hs.517155	56937	ENST00000265626
A_23_P40174	0.0479562	1.57933	up	42592.7	25608.9	13.5526	12.8933	2188.99	2390.84	1520.03	10603.4	73117.6	114784	10.4401	10.7998	12.5669	13.3796	15.6729	16.4785	NM_004994	chr20:044645121-044645180	MMP9	Homo sapiens matrix metallopeptidase 9 (gelatinase B, 92kDa gelatinase, 92kDa type IV collagenase) (MMP9), mRNA [NM_004994]	GO:0043065|GO:0051549|GO:0005509|GO:0005518|GO:0005578|GO:0005576|GO:0005615|GO:0001501|GO:0030198|GO:0030574|GO:0008152|GO:0006508|GO:0030225|GO:0008233|GO:0008270|GO:0004222	NM_004994	Hs.297413	4318	ENST00000372330
A_32_P176550	0.0125517	1.82313	up	268.902	117.047	7.66032	6.7939	161.039	336.643	38.6539	183.41	151.449	286.653	7.04814	8.10783	6.58575	7.38362	6.74783	7.4895	NM_152405	chr5:078617809-078617868	JMY	Homo sapiens junction mediating and regulatory protein, p53 cofactor (JMY), mRNA [NM_152405]	GO:0005515|GO:0051091|GO:0006281|GO:0006357|GO:0003713|GO:0007050|GO:0005634|GO:0003779|GO:0006917|GO:0006974	NM_152405	Hs.482605	133746	ENST00000396135
A_23_P253921	0.0309973	2.06132	up	208.538	87.1572	7.35256	6.30899	104.762	199.148	25.9559	170.719	130.754	255.748	6.49111	7.43088	5.87678	7.28546	6.55908	7.34133	NM_018651	chr3:044613534-044613593	ZNF167	Homo sapiens zinc finger protein 167 (ZNF167), transcript variant 1, mRNA [NM_018651]	GO:0005622|GO:0006355|GO:0003700|GO:0008270|GO:0005634|GO:0046872	NM_018651	Hs.529512	55888	ENST00000273320
A_23_P120227	0.0350317	1.60041	up	10906	5985.14	13.1444	12.466	7221.21	7828.37	1595.8	11977.5	9138.42	12912.3	12.1801	12.6722	12.6299	13.5596	12.5879	13.2015	NM_030915	chr2:030482471-030482530	LBH	Homo sapiens limb bud and heart development homolog (mouse) (LBH), mRNA [NM_030915]	GO:0005737|GO:0007275|GO:0005634|GO:0045449	NM_030915	Hs.567598	81606	ENST00000395323
A_23_P115824	0.0208414	1.76619	up	7755.35	4132.21	12.6161	11.7955	5197.07	6942.88	747.173	6751.71	6452.37	9571.45	11.6671	12.483	11.6296	12.6611	12.0898	12.7044	NM_012207	chr10:070102702-070102761	HNRNPH3	Homo sapiens heterogeneous nuclear ribonucleoprotein H3 (2H9) (HNRNPH3), transcript variant 2H9, mRNA [NM_012207]	GO:0008380|GO:0005515|GO:0000166|GO:0000398|GO:0003723|GO:0005634|GO:0030530	NM_012207	Hs.643472	3189	ENST00000265866
A_23_P109254	0.0426121	1.5461	up	14889.9	8969.92	13.6701	13.0415	12748.1	16787.7	2306.76	13453.9	11854.9	14428.1	13.0381	13.8871	13.0929	13.7436	12.9934	13.3796	NM_184234	chr20:034292430-034292371	RBM39	Homo sapiens RNA binding motif protein 39 (RBM39), transcript variant 1, mRNA [NM_184234]	GO:0008380|GO:0006397|GO:0005515|GO:0016607|GO:0000166|GO:0003723|GO:0005654|GO:0005634|GO:0005856|GO:0045449	NM_184234	Hs.282901	9584	ENST00000429968
A_23_P327022	0.000506787	1.78329	up	2593.41	1443.46	10.6369	9.80236	2097.23	3182.9	119.377	864.365	2113.77	3732.95	10.3703	11.224	8.69171	9.48866	10.3451	11.1981	NM_199072	chr7:114658631-114658690	MDFIC	Homo sapiens MyoD family inhibitor domain containing (MDFIC), transcript variant 1, mRNA [NM_199072]	GO:0005737|GO:0030111|GO:0044419|GO:0030332|GO:0005730|GO:0005634|GO:0007257|GO:0030957|GO:0045449|GO:0050434	NM_199072	Hs.427236	29969	ENST00000393486
A_23_P146050	0.0411311	1.51356	up	7014.14	3679.14	12.428	11.8301	3707.1	4588.73	1258.17	8878.03	6072.15	7575.65	11.1736	11.8113	12.3243	13.1164	11.9923	12.3564	NM_024699	chr8:082614467-082614408	ZFAND1	Homo sapiens zinc finger, AN1-type domain 1 (ZFAND1), mRNA [NM_024699]	GO:0008270|GO:0046872	NM_024699	Hs.655453	79752	ENST00000220669
A_23_P29257	0.000723184	7.93895	up	6522.42	1029.79	11.7643	8.77535	1781.65	9691.97	38.5031	1022.88	1269.22	8852.4	10.1376	12.9917	6.57886	9.71111	9.60955	12.5901	NM_005318	chr22:038203147-038203206	H1F0	Homo sapiens H1 histone family, member 0 (H1F0), mRNA [NM_005318]	GO:0005794|GO:0005694|GO:0006334|GO:0005634|GO:0005856|GO:0000786|GO:0003677	NM_005318	Hs.715673	3005	ENST00000340857
A_23_P103601	0.0326304	2.0748	up	11707.1	5077.78	13.123	12.07	10277.2	18887.8	1208.21	10469.2	3747.89	5764.45	12.7076	14.0776	12.2714	13.3625	11.231	11.9287	NM_020379	chr1:026110835-026110894	MAN1C1	Homo sapiens mannosidase, alpha, class 1C, member 1 (MAN1C1), mRNA [NM_020379]	GO:0030173|GO:0005794|GO:0016020|GO:0016798|GO:0008152|GO:0005509|GO:0004571|GO:0016021|GO:0006487	NM_020379	Hs.197043	57134	ENST00000263979	NP1210903
A_33_P3297245	0.0318485	1.75518	up	4718.78	2699.26	11.7611	10.9495	5491.08	6446.15	390.345	3147.31	2216.36	4562.87	11.7463	12.36	10.6801	11.3991	10.4222	11.5243	NM_012250	chr11:014299525-014299466	RRAS2	Homo sapiens related RAS viral (r-ras) oncogene homolog 2 (RRAS2), transcript variant 1, mRNA [NM_012250]	GO:0005622|GO:0005515|GO:0007165|GO:0030335|GO:0005886|GO:0000166|GO:0009987|GO:0005783|GO:0003924|GO:0007265|GO:0005525	NM_012250	Hs.502004	22800	ENST00000256196
A_33_P3420747	0.00105589	1.57506	up	1772.79	883.236	10.2684	9.61304	1578.12	2098.06	225.355	1716.17	846.232	1504.13	9.9823	10.6056	9.81839	10.4655	9.03844	9.73419	NM_022828	chr5:112930732-112930791	YTHDC2	Homo sapiens YTH domain containing 2 (YTHDC2), mRNA [NM_022828]	GO:0016787|GO:0000166|GO:0004386|GO:0003676|GO:0005524	NM_022828	Hs.231942	64848	ENST00000161863
A_23_P121875	0.0335413	2.03698	up	1704.57	709.75	10.2004	9.17401	1286.18	2077.49	145.849	1707.17	697.219	1329.03	9.69675	10.5906	9.05241	10.4588	8.77288	9.55187	NM_022483	chr5:043445659-043445600	C5orf28	Homo sapiens chromosome 5 open reading frame 28 (C5orf28), mRNA [NM_022483]	GO:0016020|GO:0016021	NM_022483	Hs.558531	64417	ENST00000397080
A_23_P26094	0.0470059	1.53022	up	4525.56	2655.94	11.7626	11.1489	4495.29	4510.62	527.756	4300.23	2944.76	4765.82	11.4484	11.7863	11.1462	11.9023	10.8519	11.5993	NM_024755	chr15:059171417-059171358	SLTM	Homo sapiens SAFB-like, transcription modulator (SLTM), transcript variant 1, mRNA [NM_024755]	GO:0000166|GO:0003723|GO:0006915|GO:0005634|GO:0045449	NM_024755	Hs.512932	79811	ENST00000249735
A_33_P3210278	0.049846	1.5841	up	8228.48	4309.75	12.6161	11.9524	8157.97	11008.1	1319.12	9309.5	3452.15	4367.82	12.3687	13.1905	12.3855	13.199	11.103	11.4587	NM_182914	chr14:064693075-064693134	SYNE2	Homo sapiens spectrin repeat containing, nuclear envelope 2 (SYNE2), transcript variant 5, mRNA [NM_182914]	GO:0031965|GO:0005737|GO:0016020|GO:0005634|GO:0003779|GO:0016021|GO:0005856	NM_182914	Hs.525392	23224	ENST00000261678	NP434187
A_23_P65768	0.0409418	1.58562	up	15346.3	8591.71	13.7295	13.0645	9749.77	13782.2	3079.56	15496	12945.8	16760.7	12.6315	13.5742	13.438	13.9705	13.1239	13.6438	NM_016304	chr15:055474228-055474169	RSL24D1	Homo sapiens ribosomal L24 domain containing 1 (RSL24D1), mRNA [NM_016304]	GO:0005622|GO:0003735|GO:0042254|GO:0005730|GO:0005840|GO:0005634|GO:0006412	NM_016304	Hs.274772	51187	ENST00000260443
A_23_P2661	0.00157701	1.59777	up	39247.4	25824.7	15.1335	14.4574	37037.6	43575.9	5151.76	27355.8	35284.9	46810.5	14.6579	15.3717	14.1169	14.8073	14.5975	15.2215	NM_015646	chr12:069054229-069054288	RAP1B	Homo sapiens RAP1B, member of RAS oncogene family (RAP1B), transcript variant 1, mRNA [NM_015646]	GO:0005622|GO:0005515|GO:0007165|GO:0005737|GO:0005886|GO:0000166|GO:0008283|GO:0007264|GO:0003924|GO:0005525|GO:0005829	NM_015646	Hs.369920	5908	ENST00000250559
A_33_P3211423	0.0376252	1.52095	up	3566.84	2129.36	11.3546	10.7496	3340.77	4379.49	342.637	2811.23	2704.67	3509.8	11.0329	11.7425	10.4863	11.2275	10.7296	11.0937	BX648891	chr5:167975662-167975603	PANK3	Pantothenate kinase 3 (EC 2.7.1.33)(Pantothenic acid kinase 3)(hPanK3) [Source:UniProtKB/Swiss-Prot;Acc:Q9H999] [ENST00000239231]	GO:0004594|GO:0005737|GO:0000166|GO:0015937|GO:0005524|GO:0016740		Hs.388400	79646	ENST00000239231
A_23_P8763	0.0300744	1.64085	up	4638.82	2952.74	11.6235	10.909	3095.24	4018.43	246.569	2296.52	5516.41	7601.5	10.9339	11.5877	9.96415	10.9221	11.829	12.3606	NM_002835	chr7:077269186-077269245	PTPN12	Homo sapiens protein tyrosine phosphatase, non-receptor type 12 (PTPN12), transcript variant 1, mRNA [NM_002835]	GO:0005515|GO:0017124|GO:0005737|GO:0006470|GO:0016787|GO:0005625|GO:0005829|GO:0004726	NM_002835	Hs.61812	5782	ENST00000248594
A_33_P3227320	0.0290867	1.67193	up	1848.22	931.152	10.3345	9.59299	1407.2	2198.77	179.599	1543.09	1206.66	1802.8	9.8193	10.6703	9.42565	10.3153	9.53403	10.0179	NM_152622	chr5:056215591-056215532	MIER3	Homo sapiens mesoderm induction early response 1, family member 3 (MIER3), mRNA [NM_152622]	GO:0005634|GO:0003677|GO:0045449	NM_152622	Hs.657594	166968	ENST00000452157
A_33_P3308219	0.0162912	1.60487	up	173.782	89.2502	6.9553	6.27285	117.172	181.539	22.8143	78.7789	127.765	261.027	6.63916	7.31476	5.65037	6.18362	6.52902	7.36752		chr8:007085546-007085487
A_23_P89621	0.049162	1.83392	up	1696.99	901.056	10.1413	9.26641	1062.75	1464.09	107.049	1073.23	1533.37	2553.66	9.42681	10.0775	8.5007	9.77774	9.87172	10.5688	NM_003655	chr17:077807836-077807777	CBX4	Homo sapiens chromobox homolog 4 (Pc class homolog, Drosophila) (CBX4), mRNA [NM_003655]	GO:0051219|GO:0019941|GO:0003714|GO:0003682|GO:0016481|GO:0006916|GO:0005634|GO:0000122|GO:0019899|GO:0000785|GO:0016568|GO:0006333	NM_003655	Hs.405046	8535	ENST00000343048
A_23_P383422	0.0363378	1.59352	up	374.343	187.395	7.94885	7.27663	219.904	299.188	42.5575	174.216	299.724	649.625	7.449	7.96651	6.75114	7.31596	7.62977	8.56409	NM_139239	chr19:036379398-036379339	NFKBID	Homo sapiens nuclear factor of kappa light polypeptide gene enhancer in B-cells inhibitor, delta (NFKBID), mRNA [NM_139239]	GO:0006954|GO:0005634	NM_139239	Hs.466531	84807	ENST00000396901
A_24_P93855	0.00245973	2.1886	up	276.471	112.044	7.39517	6.26516	126.325	256.836	15.4106	80.7457	194.395	491.832	6.73297	7.76984	4.9902	6.22111	7.07233	8.19458	NM_001012426	chr6:041568054-041568113	FOXP4	Homo sapiens forkhead box P4 (FOXP4), transcript variant 1, mRNA [NM_001012426]	GO:0016564|GO:0006355|GO:0003700|GO:0046982|GO:0005730|GO:0005634|GO:0000122|GO:0042803|GO:0046872|GO:0005622|GO:0007507|GO:0043565|GO:0005737|GO:0048617|GO:0008270	NM_001012426	Hs.131436	116113	ENST00000307972
A_23_P125748	0.0355765	1.85649	up	325.672	101.891	7.80753	6.91495	120.801	184.321	68.6149	565.421	116.257	227.275	6.6751	7.33326	7.67029	8.90048	6.39946	7.18884	NM_032441	chrX:101138913-101138854	ZMAT1	Homo sapiens zinc finger, matrin type 1 (ZMAT1), transcript variant 3, mRNA [NM_032441]	GO:0005622|GO:0005730|GO:0008270|GO:0005634|GO:0003677|GO:0046872	NM_032441	Hs.496512	84460	ENST00000354826
A_33_P3363799	0.0166788	1.72247	up	559.181	300.908	8.03634	7.25185	649.921	1189.04	23.0909	92.7488	229.713	395.759	8.79978	9.77417	5.67327	6.43011	7.28251	7.90472	NM_181351	chr11:113149074-113149133	NCAM1	Homo sapiens neural cell adhesion molecule 1 (NCAM1), transcript variant 2, mRNA [NM_181351]	GO:0005515|GO:0030424|GO:0034109|GO:0005886|GO:0005576|GO:0031225|GO:0016021|GO:0007155|GO:0009897|GO:0007166|GO:0050850	NM_181351	Hs.503878	4684	ENST00000316851
A_33_P3246990	0.0204043	1.56587	up	3875.57	2016.81	11.5017	10.8547	2539.82	3794.67	476.277	3461.28	3034.33	4370.76	10.6616	11.4962	10.9994	11.5484	10.9031	11.4604	NM_001167	chrX:123047703-123047762	XIAP	Homo sapiens X-linked inhibitor of apoptosis (XIAP), mRNA [NM_001167]	GO:0005515|GO:0016874|GO:0006915|GO:0006916|GO:0030414|GO:0006974|GO:0046872|GO:0005829|GO:0005622|GO:0005737|GO:0019941|GO:0008270|GO:0043027	NM_001167	Hs.356076	331	ENST00000355640
A_33_P3210139	0.0139177	1.50484	up	3400	1712.04	11.2934	10.7038	2525.31	3328.52	524.202	3544.77	2086.62	3326.7	10.6534	11.2922	11.1348	11.5857	10.3231	11.0022	NM_015885	chr11:082896736-082896795	PCF11	Homo sapiens PCF11, cleavage and polyadenylation factor subunit, homolog (S. cerevisiae) (PCF11), mRNA [NM_015885]	GO:0006379|GO:0000398|GO:0005849|GO:0005634	NM_015885	Hs.128959	51585	ENST00000298281
A_23_P259692	0.0168515	6.7729	up	13846.3	2244.98	13.2917	10.5319	4997.41	23727.4	286.892	5420.98	1450.63	12390.5	11.6062	14.444	10.1943	12.2902	9.79527	13.1409	NM_058179	chr9:080944778-080944837	PSAT1	Homo sapiens phosphoserine aminotransferase 1 (PSAT1), transcript variant 1, mRNA [NM_058179]	GO:0030170|GO:0008152|GO:0008652|GO:0004648|GO:0006564|GO:0016740|GO:0008615	NM_058179	Hs.494261	29968	ENST00000421149
A_24_P235266	0.030573	5.17344	up	215.643	42.7183	7.22843	4.8573	38.0216	265.538	5.85583	88.3864	84.2775	293.006	4.96653	7.81156	3.61056	6.35456	5.99481	7.51917	NM_001001555	chr7:050657872-050657813	GRB10	Homo sapiens growth factor receptor-bound protein 10 (GRB10), transcript variant 4, mRNA [NM_001001555]	GO:0005515|GO:0007165|GO:0005737|GO:0005886|GO:0046627|GO:0005158|GO:0005070|GO:0046325|GO:0007267|GO:0048009	NM_001001555	Hs.164060	2887	ENST00000403097
A_23_P321201	0.0351671	1.67626	up	6248.86	3141.49	12.2811	11.5358	3944.81	5112.82	847.558	7360.35	4632.1	6273.41	11.2636	11.9897	11.7887	12.7916	11.5552	12.0619	NM_015213	chr11:009160649-009160590	DENND5A	Homo sapiens DENN/MADD domain containing 5A (DENND5A), mRNA [NM_015213]	GO:0005515|GO:0017137	NM_015213	Hs.501857	23258	ENST00000328194
A_32_P104063	0.026046	5.04475	up	1031.16	232.982	9.1048	6.77002	382.558	1577.47	11.4094	218.962	304.978	1297.05	8.12888	10.1823	4.52643	7.62143	7.65474	9.51069	XR_042100	chr16:054952978-054952919	CRNDE	PREDICTED: Homo sapiens hCG1815491 (LOC643911), miscRNA [XR_042100]		XR_042100	Hs.237396	643911
A_23_P10077	0.0422453	1.90629	up	2605.52	1336.43	10.8118	9.88102	1392.64	2686.23	164.1	1570.37	2452.56	3559.95	9.80413	10.9828	9.2636	10.337	10.5753	11.1155	NM_020376	chr11:000824896-000824955	PNPLA2	Homo sapiens patatin-like phospholipase domain containing 2 (PNPLA2), mRNA [NM_020376]	GO:0016042|GO:0004806|GO:0016787|GO:0005886|GO:0010891|GO:0008152|GO:0010898|GO:0016021|GO:0012511|GO:0005829	NM_020376	Hs.654697	57104	ENST00000336615
A_23_P46936	0.0249142	2.03766	up	18415	11423.4	12.9693	11.9423	7593.7	10005.7	177.805	2044.27	26498.6	43194.9	12.2599	13.0473	9.40516	10.7489	14.162	15.1115	NM_000399	chr10:064571909-064571850	EGR2	Homo sapiens early growth response 2 (EGR2), transcript variant 1, mRNA [NM_000399]	GO:0005515|GO:0032868|GO:0006355|GO:0003700|GO:0042552|GO:0021569|GO:0005634|GO:0046872|GO:0021666|GO:0005622|GO:0014037|GO:0008045|GO:0030278|GO:0021660|GO:0048168|GO:0045944|GO:0035284|GO:0007611|GO:0007622|GO:0008270|GO:0021612	NM_000399	Hs.1395	1959	ENST00000411732	NP650156
A_33_P3333985	0.0279252	1.92465	up	187.034	102.688	6.04291	5.09832	22.4726	39.997	6.04602	28.1629	279.545	492.943	4.09187	5.31529	3.67061	4.61615	7.53247	8.19731		chr8:057389399-057389340
A_33_P3395146	0.041793	1.84848	up	245.944	108.636	7.54835	6.66201	125.468	293.535	34.7519	169.619	165.688	274.679	6.72427	7.93679	6.39315	7.27527	6.8686	7.43298	NR_024278	chr7:029685597-029685538	LOC646762	Homo sapiens hypothetical LOC646762 (LOC646762), non-coding RNA [NR_024278]		NR_024278	Hs.30579	646762
A_23_P64721	0.0224621	2.29217	up	3073.83	1446.52	8.82779	7.63108	55.2062	93.9192	26.1195	187.696	4258.25	8939.88	5.56929	6.46603	5.88834	7.41495	11.4356	12.6024	NM_006018	chr12:123199654-123199595	GPR109B	Homo sapiens G protein-coupled receptor 109B (GPR109B), mRNA [NM_006018]	GO:0007165|GO:0050995|GO:0070165|GO:0007186|GO:0005886|GO:0045028|GO:0005887|GO:0004872|GO:0070553|GO:0005525	NM_006018	Hs.458425	8843
A_33_P3353051	0.0291538	2.8093	up	39493.8	15274.4	15.1511	13.6609	14705.8	33059.8	3162.01	38104.3	27955.3	47317.1	13.2622	14.9273	13.4675	15.2946	14.253	15.2313	NM_001040438	chr6:031802884-031802943	C6orf48	Homo sapiens chromosome 6 open reading frame 48 (C6orf48), transcript variant 2, mRNA [NM_001040438]		NM_001040438	Hs.640836	50854	ENST00000375636
A_33_P3286151	0.0212648	1.72167	up	197.714	112.37	6.66047	5.87666	50.2694	76.247	12.9176	56.7547	273.922	460.142	5.41141	6.19066	4.70903	5.69627	7.50954	8.09447	XM_001715815	chr8:072875207-072875266	LOC100132891	PREDICTED: Homo sapiens hypothetical protein LOC100132891 (LOC100132891), mRNA [XM_001715815]		XM_001715815	Hs.137674	100132891
A_24_P408603	0.0462258	2.46562	up	1361.37	532.982	9.86824	8.56629	712.146	1482.54	73.3759	974.827	813.425	1626.75	8.91243	10.0983	7.79864	9.65092	8.98781	9.85556	NM_171998	chrX:154488063-154488004	RAB39B	Homo sapiens RAB39B, member RAS oncogene family (RAB39B), mRNA [NM_171998]	GO:0005622|GO:0005886|GO:0000166|GO:0007264|GO:0015031|GO:0005525	NM_171998	Hs.632832	116442	ENST00000369454
A_32_P70135	0.0120104	1.65382	up	4243.37	2296.64	11.6423	10.9165	3617.61	4933.92	422.387	3639.61	2849.92	4156.6	11.142	11.9259	10.8042	11.6306	10.8033	11.3704	NM_025138	chr13:039584423-039584364	C13orf23	Homo sapiens chromosome 13 open reading frame 23 (C13orf23), transcript variant 1, mRNA [NM_025138]		NM_025138	Hs.318526	80209	ENST00000379609
A_24_P288424	0.0132882	1.69541	up	5205.55	2860.85	11.9835	11.2219	4157.8	5130.92	480.389	4455.52	3944.36	6030.23	11.3382	11.9959	11.0126	11.9507	11.3148	12.004	NM_016045	chr20:057608816-057608757	SLMO2	Homo sapiens slowmo homolog 2 (Drosophila) (SLMO2), mRNA [NM_016045]		NM_016045	Hs.712756	51012	ENST00000355937
A_23_P145074	0.0426071	1.53948	up	42592.7	27492.7	15.1739	14.5514	19601.1	24859.5	8579.69	40516.3	54297.2	62402.3	13.6963	14.5262	14.7266	15.389	15.2313	15.6064	NM_006813	chr6:089794426-089794485	PNRC1	Homo sapiens proline-rich nuclear receptor coactivator 1 (PNRC1), mRNA [NM_006813]	GO:0005515|GO:0005634|GO:0045449	NM_006813	Hs.75969	10957	ENST00000336032
A_24_P366749	0.0356418	1.80236	up	64.8418	28.637	5.82517	4.97528	37.9693	67.6114	19.7873	66.7479	28.1545	60.166	4.96426	6.03081	5.4122	5.93844	4.54937	5.50625	NM_001005855		ATP8B2	Homo sapiens ATPase, class I, type 8B, member 2 (ATP8B2), transcript variant 2, mRNA [NM_001005855]	GO:0006754|GO:0000287|GO:0016787|GO:0016020|GO:0015914|GO:0000166|GO:0004012|GO:0016820|GO:0016021|GO:0016887|GO:0005524|GO:0015662	NM_001005855	Hs.435700	57198	ENST00000396487
A_33_P3241393	0.00474578	1.67754	up	547.889	262.692	8.61046	7.86411	312.282	506.51	68.7408	421.828	407.054	715.329	7.88016	8.62247	7.67299	8.51066	8.03918	8.69824	NM_133478	chr2:074443455-074443396	SLC4A5	Homo sapiens solute carrier family 4, sodium bicarbonate cotransporter, member 5 (SLC4A5), transcript variant c, mRNA [NM_133478]	GO:0006820|GO:0008509|GO:0005215|GO:0005886|GO:0005452|GO:0016021|GO:0031402|GO:0006814	NM_133478	Hs.594099	57835	ENST00000451608
A_33_P3418025	0.0209168	1.52493	up	2698.24	1508	10.8337	10.2249	1156.64	1750.35	286.962	2005.87	3080.4	4338.5	9.55007	10.3376	10.1945	10.7189	10.9302	11.4445	NM_001334	chr4:156845446-156845387	CTSO	Homo sapiens cathepsin O (CTSO), mRNA [NM_001334]	GO:0004197|GO:0006508|GO:0008233	NM_001334	Hs.75262	1519	ENST00000281527
A_33_P3286684	0.0498458	1.52322	up	209.019	99.4081	7.36174	6.75461	142.887	181.089	50.5416	281.145	104.796	164.823	6.89961	7.3132	7.08947	7.97067	6.27476	6.80135	AF116605	chr7:50367412-50367471		DNA-binding protein Ikaros (Ikaros family zinc finger protein 1)(Lymphoid transcription factor LyF-1) [Source:UniProtKB/Swiss-Prot;Acc:Q13422] [ENST00000440768]					ENST00000440768
A_33_P3330099	0.0413306	1.64055	up	841.444	464.392	8.97181	8.25763	422.495	812.48	59.1439	290.999	911.537	1420.85	8.24678	9.24949	7.38214	8.02244	9.14398	9.64352	NM_001669	chrX:002822073-002822014	ARSD	Homo sapiens arylsulfatase D (ARSD), transcript variant 1, mRNA [NM_001669]	GO:0016787|GO:0008152|GO:0005509|GO:0004065|GO:0005764	NM_001669	Hs.528631	414	ENST00000381154
A_33_P3781228	0.0477324	1.5085	up	183.308	103.482	7.18392	6.59081	116.472	172.676	33.287	152.417	160.686	224.83	6.62894	7.25719	6.31697	7.12339	6.82651	7.17119	AK129842	chr20:48801277-48801218	FLJ26332	Homo sapiens cDNA FLJ26332 fis, clone HRT02453 [AK129842]			Hs.651819	440766
A_23_P139500	0.0480664	2.29716	up	2072.22	899.3	8.16455	6.9647	30.6107	39.2705	22.2472	162.106	2645.04	6015.27	4.60057	5.28415	5.60043	7.2123	10.6931	11.9972	NM_030762	chr12:026273691-026273632	BHLHE41	Homo sapiens basic helix-loop-helix family, member e41 (BHLHE41), mRNA [NM_030762]	GO:0006355|GO:0003700|GO:0008283|GO:0009887|GO:0005634|GO:0030154	NM_030762	Hs.177841	79365	ENST00000242728
A_23_P166297	0.0351193	1.78959	up	1693.46	962.136	10.0457	9.20606	749.34	1336.38	98.4807	799.446	2038.59	2944.56	8.97376	9.94845	8.35473	9.38119	10.2897	10.8074	NM_207627	chr21:043716784-043716843	ABCG1	Homo sapiens ATP-binding cassette, sub-family G (WHITE), member 1 (ABCG1), transcript variant 5, mRNA [NM_207627]	GO:0019534|GO:0005886|GO:0005783|GO:0017127|GO:0033993|GO:0010872|GO:0042803|GO:0005543|GO:0000166|GO:0015485|GO:0016887|GO:0045449|GO:0009720|GO:0008203|GO:0042987|GO:0042632|GO:0033344|GO:0005794|GO:0046982|GO:0010745|GO:0043691|GO:0005548|GO:0005524|GO:0010887|GO:0033700|GO:0043531|GO:0034374|GO:0005887|GO:0034041|GO:0034375|GO:0006869|GO:0055091|GO:0055037|GO:0034436|GO:0034437|GO:0045542|GO:…	NM_207627	Hs.124649	9619	ENST00000340588
A_24_P172990	0.0222809	3.55245	up	3311.39	1053.04	11.1693	9.34045	1536.94	3709.2	90.9344	1853.47	1531.24	4371.5	9.94049	11.4533	8.21148	10.5937	9.86939	11.4608	NM_001605	chr16:070287935-070287876	AARS	Homo sapiens alanyl-tRNA synthetase (AARS), mRNA [NM_001605]	GO:0005737|GO:0000049|GO:0000166|GO:0016874|GO:0006419|GO:0004813|GO:0005625|GO:0003676|GO:0043039|GO:0006412|GO:0005524|GO:0008033	NM_001605	Hs.315137	16	ENST00000261772
A_33_P3221458	0.0473325	1.62839	up	570.938	229.698	8.49797	7.79453	138.392	195.94	97.8574	790.269	452.845	726.604	6.85537	7.40949	8.34491	9.36564	8.1833	8.71878	NR_002722	chr6:027325667-027325608	ZNF204	Homo sapiens zinc finger protein 204 pseudogene (ZNF204), non-coding RNA [NR_002722]		NR_002722	Hs.8198	7754
A_33_P3330952	0.0142283	1.53182	up	4858.24	2705.75	11.8176	11.2023	2567.59	3497.21	574.253	4502.53	4975.42	6574.99	10.6761	11.3546	11.2675	11.9673	11.6634	12.1308	NM_006095	chr4:042410508-042410449	ATP8A1	Homo sapiens ATPase, aminophospholipid transporter (APLT), class I, type 8A, member 1 (ATP8A1), transcript variant 1, mRNA [NM_006095]	GO:0000287|GO:0031410|GO:0005524|GO:0015662|GO:0019829|GO:0006754|GO:0000166|GO:0015914|GO:0016020|GO:0016787|GO:0004012|GO:0008152|GO:0016820|GO:0015917|GO:0016021	NM_006095	Hs.435052	10396	ENST00000381668
A_23_P208493	0.00341365	1.74689	up	1119.67	648.841	7.3492	6.54441	23.9111	34.1849	17.942	69.1066	1904.67	3255.73	4.19508	5.09147	5.24978	5.98942	10.1884	10.9667	NM_005874	chr19:054778388-054778329	LILRB2	Homo sapiens leukocyte immunoglobulin-like receptor, subfamily B (with TM and ITIM domains), member 2 (LILRB2), transcript variant 1, mRNA [NM_005874]	GO:0006968|GO:0006955|GO:0005886|GO:0005887|GO:0007267|GO:0005624|GO:0004872|GO:0007166	NM_005874	Hs.655652	10288	ENST00000434421
A_23_P58390	0.0190347	1.81007	up	2553.49	1158.88	10.8179	9.96188	1780.57	3119.5	244.914	1860.18	1451.15	2680.79	10.1357	11.1977	9.95432	10.6013	9.79566	10.6548	NM_152400	chr4:113109969-113110028	C4orf32	Homo sapiens chromosome 4 open reading frame 32 (C4orf32), mRNA [NM_152400]	GO:0016020|GO:0016021	NM_152400	Hs.23439	132720	ENST00000309733
A_32_P20523	0.0165365	1.51737	up	580.838	308.656	8.70731	8.10573	459.907	624.022	81.4114	507.919	384.651	610.573	8.35131	8.88157	7.999	8.75704	7.9669	8.48332	NM_145715	chr4:090035736-090035795	TIGD2	Homo sapiens tigger transposable element derived 2 (TIGD2), mRNA [NM_145715]	GO:0005634|GO:0003677|GO:0045449|GO:0000775	NM_145715	Hs.58924	166815	ENST00000317005
A_23_P322043	0.0423667	1.6949	up	2866.93	1645.82	10.9462	10.185	2697.71	3106.03	188.079	1649.94	2051.68	3844.81	10.7507	11.1892	9.50398	10.4043	10.3003	11.2451	NM_015327	chr1:156219354-156219295	SMG5	Homo sapiens Smg-5 homolog, nonsense mediated mRNA decay factor (C. elegans) (SMG5), mRNA [NM_015327]	GO:0005515|GO:0035303|GO:0005737|GO:0006406|GO:0000184|GO:0005634|GO:0051721	NM_015327	Hs.516837	23381	ENST00000368267	NP1147230
A_24_P398810	0.0390404	1.6306	up	554.861	256.251	8.6557	7.95029	367.786	502.205	84.5378	635.716	316.429	526.66	8.07798	8.61345	8.07282	9.06375	7.70008	8.2899	NM_001969	chr14:103811176-103811235	EIF5	Homo sapiens eukaryotic translation initiation factor 5 (EIF5), transcript variant 1, mRNA [NM_001969]	GO:0005737|GO:0000166|GO:0006446|GO:0003924|GO:0003743|GO:0005525|GO:0005829	NM_001969	Hs.433702	1983	ENST00000216554
A_33_P3386716	0.0311926	1.62889	up	6644.58	4164.52	12.3193	11.6154	5725.15	6944.2	469.054	4332.82	6299.36	8656.7	11.8182	12.4837	10.9758	11.9169	12.0521	12.5572	NM_032833	chr1:204372653-204372594	PPP1R15B	Homo sapiens protein phosphatase 1, regulatory (inhibitor) subunit 15B (PPP1R15B), mRNA [NM_032833]	GO:0042542|GO:0006983|GO:0000164|GO:0004722|GO:0006979|GO:0006417	NM_032833	Hs.304376	84919	ENST00000367188
A_23_P155332	0.0451543	1.50223	up	10946.6	7245.28	13.1374	12.5503	8999.55	9755.53	1112.77	8403.03	11623.5	14681.3	12.5283	13.0036	12.1578	13.0025	12.9648	13.406	NM_020357	chr3:101312884-101312943	PCNP	Homo sapiens PEST proteolytic signal containing nuclear protein (PCNP), mRNA [NM_020357]	GO:0005515|GO:0007049|GO:0016567|GO:0043161|GO:0005634	NM_020357	Hs.275865	57092	ENST00000460231
A_23_P85783	0.0402116	5.04781	up	3199.38	858.601	10.9831	8.64745	1499.65	5080.28	41.9257	1240.08	1034.23	3277.77	9.90182	11.9748	6.72568	9.99783	9.31486	10.9767	NM_006623	chr1:120285529-120285588	PHGDH	Homo sapiens phosphoglycerate dehydrogenase (PHGDH), mRNA [NM_006623]	GO:0010468|GO:0048037|GO:0021510|GO:0019530|GO:0008652|GO:0009055|GO:0022402|GO:0031175|GO:0004617|GO:0051287|GO:0021782|GO:0007420|GO:0021915|GO:0006544|GO:0016491|GO:0006564|GO:0006566|GO:0055114|GO:0022008|GO:0006541|GO:0009448	NM_006623	Hs.487296	26227	ENST00000369407
A_33_P3264238	0.00305187	1.86871	up	175.985	76.4073	7.12208	6.22004	127.005	230.276	29.776	133.978	72.4408	163.701	6.74005	7.62692	6.12117	6.9453	5.79888	6.79401	NM_080764	chr22:022839041-022838982	ZNF280B	Homo sapiens zinc finger protein 280B (ZNF280B), mRNA [NM_080764]	GO:0005622|GO:0008270|GO:0005634|GO:0003677|GO:0046872|GO:0045449	NM_080764	Hs.43834	140883	ENST00000360412
A_23_P35082	0.0185823	2.58271	up	998.741	365.668	9.35169	7.98281	477.172	1137.41	49.701	514.611	570.131	1344.21	8.39425	9.71157	7.05621	8.77561	8.49796	9.56789	NM_031459	chr1:028608194-028608253	SESN2	Homo sapiens sestrin 2 (SESN2), mRNA [NM_031459]	GO:0005737|GO:0007050|GO:0005634	NM_031459	Hs.469543	83667	ENST00000253063
A_23_P162279	0.0195605	1.65659	up	1755.79	947.651	10.248	9.51974	1247	1709.74	150.544	1281.28	1445.41	2276.34	9.65579	10.2985	9.11518	10.0492	9.78824	10.3962	NM_018318	chr12:028702878-028702937	CCDC91	Homo sapiens coiled-coil domain containing 91 (CCDC91), mRNA [NM_018318]	GO:0005794|GO:0016020|GO:0015031|GO:0042802|GO:0019898	NM_018318	Hs.653125	55297	ENST00000381259
A_33_P3231645	0.048748	1.50493	up	76.6358	42.5932	6.05671	5.46701	64.5179	73.5024	21.3734	77.6295	41.8882	78.7755	5.79839	6.13944	5.5373	6.15934	5.06535	5.87135	XM_001714404	chr12:000861042-000860983	LOC100132369	PREDICTED: Homo sapiens hypothetical LOC100132369 (LOC100132369), mRNA [XM_001714404]		XM_001714404	Hs.719460	100132369
A_23_P217845	1.5543e-05	2.00774	up	2070.13	998.268	10.3358	9.33022	1382.21	2384.45	97.6539	783.414	1514.94	3042.52	9.79384	10.7942	8.34153	9.35489	9.85527	10.8582	NM_002928	chr1:182571177-182571118	RGS16	Homo sapiens regulator of G-protein signaling 16 (RGS16), mRNA [NM_002928]	GO:0005516|GO:0008277|GO:0005624|GO:0045121|GO:0009968|GO:0004871|GO:0007601|GO:0005096	NM_002928	Hs.413297	6004	ENST00000367558
A_33_P3237487	0.0127252	1.70846	up	127.702	66.21	6.6879	5.9152	100.105	162.75	19.7305	87.5368	78.7946	132.819	6.43375	7.19042	5.40672	6.33923	5.90513	6.53404	AK123475	chr2:19167831-19167772	FLJ41481	Homo sapiens cDNA FLJ41481 fis, clone BRTHA2002721 [AK123475]			Hs.502854	400945
A_23_P64669	0.0231576	1.5485	up	4198.61	2317.54	11.6359	11.0051	3236.59	4509.09	482.08	3726.11	3233.95	4360.64	10.9954	11.7858	11.0176	11.6664	11.0022	11.4556	NM_017612	chr12:122957778-122957719	ZCCHC8	Homo sapiens zinc finger, CCHC domain containing 8 (ZCCHC8), mRNA [NM_017612]	GO:0008380|GO:0006397|GO:0005515|GO:0008270|GO:0005681|GO:0003676|GO:0046872	NM_017612	Hs.37706	55596	ENST00000336229	NP181943
A_23_P331908	0.0147078	1.5034	up	268.048	151.837	7.61537	7.02714	306.886	406.095	48.4078	237.584	100.219	160.464	7.85924	8.34192	7.00829	7.73447	6.2139	6.76971	AK097878	chr11:45236216-45236275		cDNA FLJ40559 fis, clone THYMU2002910 [Source:UniProtKB/TrEMBL;Acc:Q8N1K6] [ENST00000399269]			Hs.178715		ENST00000399269
A_23_P166306	0.00244966	12.3349	up	4719.56	397.995	11.3622	7.73755	740.242	8853.42	30.3619	1136.47	423.382	4168.77	8.9603	12.8476	6.15817	9.86412	8.09419	11.375	NM_000071	chr21:044473378-044473319	CBS	Homo sapiens cystathionine-beta-synthase (CBS), mRNA [NM_000071]	GO:0019343|GO:0070814|GO:0006535|GO:0005730|GO:0008652|GO:0005634|GO:0046872|GO:0042803|GO:0016829|GO:0005829|GO:0005737|GO:0043418|GO:0030170|GO:0008152|GO:0004122|GO:0006565|GO:0019448|GO:0031625|GO:0020037	NM_000071	Hs.533013	875	ENST00000398168
A_23_P18798	0.0437895	1.6646	up	51.4803	21.9895	5.33434	4.59917	21.6766	27.2004	19.4238	90.4566	24.868	36.784	4.03172	4.77145	5.38009	6.38855	4.3857	4.84303	NM_019119	chr5:140570085-140570144	PCDHB9	Homo sapiens protocadherin beta 9 (PCDHB9), mRNA [NM_019119]	GO:0016339|GO:0005515|GO:0005886|GO:0005509|GO:0007268|GO:0016021|GO:0007155|GO:0007416|GO:0007156	NM_019119	Hs.662726	56127
A_23_P57007	0.0201102	1.79993	up	85.7091	38.6805	6.20194	5.354	54.2175	79.0212	20.8074	81.922	41.0164	96.1842	5.53643	6.23506	5.48943	6.24469	5.03613	6.12606	XM_001721104	chr20:039665854-039665795	PRO0628	PREDICTED: Homo sapiens uncharacterized protein PRO0628-like (LOC100127886), mRNA [XM_001721104]		XM_001721104		100127886
A_33_P3329712	0.0195148	1.85843	up	111.747	56.5579	6.41971	5.52563	80.8818	146.026	11.7194	55.606	77.0726	133.608	6.13327	7.05145	4.56631	5.66692	5.8773	6.54077		chr11:4731639-4731698		Putative uncharacterized protein ENSP00000349693 Fragment [Source:UniProtKB/TrEMBL;Acc:A6NIQ0] [ENST00000357170]					ENST00000357170
A_24_P303145	0.048423	1.78994	up	310.192	159.63	7.81314	6.97323	150.769	264.83	34.0005	202.228	294.12	463.518	6.96365	7.80924	6.35301	7.52236	7.60304	8.10783	NM_054027	chr5:014705088-014705029	ANKH	Homo sapiens ankylosis, progressive homolog (mouse) (ANKH), mRNA [NM_054027]	GO:0030500|GO:0001501|GO:0005887|GO:0019867|GO:0006810|GO:0006817|GO:0007626|GO:0005315|GO:0030504	NM_054027	Hs.156727	56172	ENST00000284268
A_33_P3286958	0.011271	1.50882	up	303.983	134.564	7.75538	7.16196	235.482	366.17	74.0269	404.442	94.1838	141.339	7.53213	8.20932	7.81313	8.44744	6.1406	6.60938	NM_003783	chr1:193148275-193148216	B3GALT2	Homo sapiens UDP-Gal:betaGlcNAc beta 1,3-galactosyltransferase, polypeptide 2 (B3GALT2), mRNA [NM_003783]	GO:0009312|GO:0030145|GO:0005794|GO:0016020|GO:0016757|GO:0008499|GO:0006486|GO:0016021|GO:0008378	NM_003783	Hs.518834	8707	ENST00000367434
A_23_P153197	0.0404189	1.76429	up	5720.43	3077.78	11.967	11.1479	1782.36	2935.65	513.635	4851.83	6937.35	9373.82	10.1393	11.1106	11.1093	12.1153	12.1952	12.6751	NM_170695		TGIF1	Homo sapiens TGFB-induced factor homeobox 1 (TGIF1), transcript variant 1, mRNA [NM_170695]	GO:0043565|GO:0005515|GO:0006355|GO:0003700|GO:0003714|GO:0007275|GO:0005634|GO:0000122	NM_170695	Hs.373550	7050	ENST00000343820
A_33_P3251771	0.00135168	1.53571	up	2445.07	1373.39	10.7642	10.1453	2094.01	2695.15	249.278	1810.38	1776.87	2829.68	10.3699	10.988	9.97957	10.5594	10.0865	10.7453	NM_015247	chr16:050835733-050835792	CYLD	Homo sapiens cylindromatosis (turban tumor syndrome) (CYLD), transcript variant 1, mRNA [NM_015247]	GO:0005622|GO:0006511|GO:0048471|GO:0007049|GO:0005737|GO:0003735|GO:0005840|GO:0008233|GO:0008234|GO:0004221|GO:0005856|GO:0006412	NM_015247	Hs.578973	1540	ENST00000311559
A_33_P3333317	0.00740582	1.64627	up	6456.17	3784.71	12.317	11.5978	5860.08	7464.84	584.372	4825.89	4909.69	7077.77	11.8585	12.6032	11.2937	12.1057	11.6411	12.242	NM_001008211	chr10:013180217-013180276	OPTN	Homo sapiens optineurin (OPTN), transcript variant 1, mRNA [NM_001008211]	GO:0008219|GO:0007165|GO:0048471|GO:0005737|GO:0005794|GO:0043001|GO:0007030|GO:0016023|GO:0034613|GO:0008022|GO:0000042	NM_001008211	Hs.332706	10133	ENST00000396951
A_32_P517749	0.00145297	1.69696	up	13102.5	7308.7	13.4484	12.6855	8753.05	11357.5	1584.38	10858.1	11588.7	17092	12.4798	13.2545	12.6173	13.4238	12.9593	13.667	NM_004586	chrX:020168138-020168079	RPS6KA3	Homo sapiens ribosomal protein S6 kinase, 90kDa, polypeptide 3 (RPS6KA3), mRNA [NM_004586]	GO:0000287|GO:0005634|GO:0007417|GO:0005524|GO:0007243|GO:0007165|GO:0001501|GO:0005737|GO:0000166|GO:0004674|GO:0005654|GO:0006468|GO:0016740	NM_004586	Hs.445387	6197	ENST00000397731
A_33_P3375934	0.0462413	2.04683	up	4088.97	2074.83	11.5182	10.4848	2466.03	4829.35	210.361	2338.39	3548.11	5099.16	10.6109	11.8921	9.70072	10.9465	11.1428	11.7161	NM_005746	chr7:105888852-105888793	NAMPT	Homo sapiens nicotinamide phosphoribosyltransferase (NAMPT), mRNA [NM_005746]	GO:0007165|GO:0047280|GO:0008284|GO:0005737|GO:0016757|GO:0019674|GO:0007267|GO:0019363|GO:0005125|GO:0005829	NM_005746	Hs.489615	10135	ENST00000222553
A_33_P3295650	0.027625	1.61938	up	235.388	121.365	7.46909	6.77365	119.367	220.747	37.1064	159.705	207.621	325.711	6.66298	7.56685	6.50316	7.19042	7.1548	7.64999	NM_001163	chr9:072045529-072045470	APBA1	Homo sapiens amyloid beta (A4) precursor protein-binding, family A, member 1 (APBA1), mRNA [NM_001163]	GO:0005515|GO:0010468|GO:0005886|GO:0014051|GO:0005546|GO:0007268|GO:0030165|GO:0014047|GO:0001701|GO:0006886|GO:0007399|GO:0008021|GO:0006461|GO:0035264|GO:0007626|GO:0008088|GO:0007155	NM_001163	Hs.171939	320	ENST00000265381
A_23_P258964	0.00358448	1.97038	up	14878	8141.03	13.6316	12.6531	14100.7	18793.8	1112.08	9439.72	9210.29	16400.5	13.1999	14.0651	12.1562	13.2184	12.6032	13.6112	NM_013417	chr9:094972930-094972871	IARS	Homo sapiens isoleucyl-tRNA synthetase (IARS), transcript variant long, mRNA [NM_013417]	GO:0005737|GO:0000166|GO:0016874|GO:0008270|GO:0005625|GO:0006428|GO:0005524|GO:0004822|GO:0005829	NM_013417	Hs.445403	3376	ENST00000443024
A_23_P70168	0.0272426	1.78622	up	11900.3	6945.69	13.2574	12.4205	10782.3	15570.4	916.986	7663.02	9137.78	12467.5	12.775	13.78	11.8994	12.8484	12.5871	13.1438	NM_152295	chr5:033467942-033468001	TARS	Homo sapiens threonyl-tRNA synthetase (TARS), mRNA [NM_152295]	GO:0005515|GO:0006435|GO:0005737|GO:0000166|GO:0016874|GO:0004829|GO:0005524|GO:0042803|GO:0005829	NM_152295	Hs.481860	6897	ENST00000455217
A_24_P59607	0.00674489	3.00303	up	758.522	217.73	8.8457	7.25928	377.604	1284.57	33.142	279.751	242.443	711.246	8.11341	9.88667	6.30937	7.96132	7.35506	8.68912	NM_001113434	chr17:021436035-021435976	C17orf51	Homo sapiens chromosome 17 open reading frame 51 (C17orf51), mRNA [NM_001113434]		NM_001113434	Hs.514016	339263	ENST00000391411
A_23_P96590	0.00342168	1.85276	up	900.308	329.568	9.17834	8.28866	218.146	421.406	123.941	902.747	646.617	1376.77	7.43762	8.38842	8.76001	9.54588	8.66836	9.6007	NM_014710	chrX:101913205-101913264	GPRASP1	Homo sapiens G protein-coupled receptor associated sorting protein 1 (GPRASP1), transcript variant 1, mRNA [NM_014710]	GO:0005737|GO:0005488	NM_014710	Hs.710048	9737	ENST00000361600
A_24_P181149	0.0165204	1.58355	up	1052.04	503.875	9.48697	8.82381	500.943	751.738	136.027	1037.24	874.655	1367.13	8.45867	9.14096	8.92654	9.72871	9.08622	9.59125	NM_024685	chr12:076738836-076738777	BBS10	Homo sapiens Bardet-Biedl syndrome 10 (BBS10), mRNA [NM_024685]	GO:0005515|GO:0000166|GO:0001895|GO:0045494|GO:0035058|GO:0044267|GO:0005524|GO:0050896	NM_024685	Hs.96322	79738	ENST00000393262
A_23_P140876	0.0400947	2.03417	up	704.975	281.819	8.85376	7.82932	339.535	923.758	57.8494	332.267	448.072	858.9	7.97784	9.42241	7.34408	8.20167	8.16606	8.93721	NM_001089	chr16:002326322-002326263	ABCA3	Homo sapiens ATP-binding cassette, sub-family A (ABC1), member 3 (ABCA3), mRNA [NM_001089]	GO:0005215|GO:0005886|GO:0000166|GO:0042599|GO:0042493|GO:0006810|GO:0042626|GO:0005624|GO:0016021|GO:0016887|GO:0005524	NM_001089	Hs.26630	21	ENST00000436770
A_23_P65442	0.0115971	1.53315	up	12667.2	6475.93	13.3768	12.7603	9364.15	11043.8	3426.6	16514.9	6637.04	10443	12.5766	13.1965	13.5753	14.0741	12.129	12.8598	NM_006084	chr14:024635500-024635559	IRF9	Homo sapiens interferon regulatory factor 9 (IRF9), mRNA [NM_006084]	GO:0006355|GO:0005737|GO:0003700|GO:0006366|GO:0045351|GO:0005634|GO:0009615|GO:0007166|GO:0042802	NM_006084	Hs.1706	10379	ENST00000396864
A_23_P343411	0.0232819	1.50554	up	1016.47	579.382	9.06903	8.47874	399.065	618.423	67.8421	298.656	1271.24	2132.33	8.17369	8.86782	7.65083	8.05833	9.61172	10.2809	NM_198576	chr1:000991186-000991245	AGRN	Homo sapiens agrin (AGRN), mRNA [NM_198576]	GO:0007009|GO:0009986|GO:0005605|GO:0045202|GO:0005576|GO:0045213|GO:0007213|GO:0007416|GO:0007165|GO:0045162|GO:0007528|GO:0030548|GO:0045944|GO:0043236|GO:0005200|GO:0043113|GO:0008582	NM_198576	Hs.273330	375790	ENST00000379364	NP1152870
A_23_P210048	0.0497636	1.5881	up	1299.5	669.316	9.79441	9.12711	654.738	1177.38	144.275	989.168	1208.93	1731.97	8.81113	9.76112	9.03369	9.66854	9.53651	9.95358	NM_006037	chr2:239970735-239970676	HDAC4	Homo sapiens histone deacetylase 4 (HDAC4), mRNA [NM_006037]	GO:0008284|GO:0016566|GO:0008285|GO:0042826|GO:0016563|GO:0005634|GO:0010832|GO:0030017|GO:0043433|GO:0051091|GO:0005737|GO:0006954|GO:0017053|GO:0070491|GO:0014898|GO:0030183|GO:0033235|GO:0006338|GO:0045820|GO:0004407|GO:0033613|GO:0070555|GO:0045449|GO:0016575|GO:0034983|GO:0042493|GO:0043393|GO:0010553|GO:0010843|GO:0010552|GO:0030955|GO:0014894|GO:0007399|GO:0001501|GO:0000118|GO:0016787|GO:…	NM_006037	Hs.20516	9759	ENST00000345617
A_33_P3331601	0.0142641	1.84097	up	131.012	57.0574	6.7498	5.86933	64.2685	99.4482	25.7782	134.829	81.1254	158.759	5.79324	6.53474	5.8665	6.95579	5.94824	6.75886	NM_024838	chr10:025315460-025315519	THNSL1	Homo sapiens threonine synthase-like 1 (S. cerevisiae) (THNSL1), mRNA [NM_024838]	GO:0004765|GO:0030170|GO:0008152|GO:0005575|GO:0003824|GO:0005524|GO:0004795|GO:0009088	NM_024838	Hs.645274	79896	ENST00000376356
A_33_P3340990	0.0457441	1.65654	up	1861.04	915.814	10.3196	9.59139	1596.96	2380.96	195.211	1794.54	955.271	1407.63	10.0004	10.7921	9.57081	10.5411	9.203	9.62543	NM_001012398	chr5:024172059-024172118	AKTIP	Homo sapiens AKT interacting protein (AKTIP), transcript variant 1, mRNA [NM_001012398]	GO:0005515|GO:0051246|GO:0030897|GO:0005886|GO:0008333|GO:0006915|GO:0015031|GO:0045022|GO:0005737|GO:0019787|GO:0007032|GO:0007040|GO:0070695|GO:0019898|GO:0043687	NM_001012398	Hs.380897	64400	ENST00000300245
A_23_P21134	0.0254798	2.90738	up	2518.64	853.889	10.7521	9.21234	823.474	2740.94	112.409	1447.08	1625.78	3367.9	9.09582	11.0126	8.58687	10.224	9.95432	11.0196	NM_004083		DDIT3	Homo sapiens DNA-damage-inducible transcript 3 (DDIT3), mRNA [NM_004083]	GO:0042542|GO:0006355|GO:0043065|GO:0003700|GO:0006983|GO:0007584|GO:0042493|GO:0003714|GO:0007568|GO:0032792|GO:0005634|GO:0006974|GO:0030968|GO:0043565|GO:0001975|GO:0005737|GO:0007049|GO:0045941|GO:0048568|GO:0046983|GO:0045454|GO:0042789|GO:0007050|GO:0006979	NM_004083	Hs.505777	1649	ENST00000346473	NP313402
A_33_P3352103	0.0488116	1.7324	up	1459.1	671.186	9.9861	9.19333	617.284	1262.37	166.388	1256.9	1229.89	1858.02	8.73306	9.86534	9.28599	10.0221	9.56094	10.0709	NM_138794	chr1:219386138-219386197	LYPLAL1	Homo sapiens lysophospholipase-like 1 (LYPLAL1), mRNA [NM_138794]	GO:0008150|GO:0005737|GO:0016787|GO:0004622|GO:0005575	NM_138794	Hs.657617	127018	ENST00000366927
A_23_P593	0.0229859	1.54817	up	6009.96	3432.18	12.2069	11.5764	4598.9	4961.22	718.772	5671.25	4978.88	7397.43	11.4823	11.933	11.5813	12.366	11.6655	12.3219	NM_021639	chr1:046093492-046093433	GPBP1L1	Homo sapiens GC-rich promoter binding protein 1-like 1 (GPBP1L1), mRNA [NM_021639]	GO:0005634|GO:0003677|GO:0045449	NM_021639	Hs.238432	60313	ENST00000355105
A_33_P3240229	0.0389399	1.61789	up	575.305	270.719	8.69951	8.0054	363.715	639.06	84.0743	556.185	364.368	530.669	8.06473	8.91793	8.06186	8.87835	7.88959	8.30226	NM_004380	chr16:003775171-003775112	CREBBP	Homo sapiens CREB binding protein (CREBBP), transcript variant 1, mRNA [NM_004380]	GO:0003700|GO:0008283|GO:0046332|GO:0005634|GO:0018076|GO:0042975|GO:0046872|GO:0002039|GO:0005737|GO:0045941|GO:0045944|GO:0044419|GO:0000123|GO:0004871|GO:0030718|GO:0004402|GO:0005667|GO:0001666|GO:0006355|GO:0016573|GO:0003713|GO:0042592|GO:0007165|GO:0051577|GO:0000940|GO:0006461|GO:0008270|GO:0016407|GO:0016740	NM_004380	Hs.459759	1387	ENST00000262367
A_33_P3422802	0.0164703	8.76644	up	682.829	64.0047	8.50734	5.37535	70.2144	1141.9	6.77552	141.429	115.024	765.155	5.91649	9.71578	3.82134	7.02336	6.38822	8.78287	NM_025218	chr6:150294682-150294741	ULBP1	Homo sapiens UL16 binding protein 1 (ULBP1), mRNA [NM_025218]	GO:0006955|GO:0030101|GO:0005886|GO:0019882|GO:0005783|GO:0042612|GO:0031225|GO:0032393	NM_025218	Hs.653255	80329	ENST00000229708
A_23_P84629	0.0353095	1.53198	up	926.884	552.333	9.20448	8.58908	595.339	764.485	74.704	478.11	986.956	1538.06	8.69074	9.15932	7.83141	8.68201	9.2451	9.7721	NM_002917		RFNG	Homo sapiens RFNG O-fucosylpeptide 3-beta-N-acetylglucosaminyltransferase (RFNG), mRNA [NM_002917]	GO:0033829|GO:0007389|GO:0003674|GO:0030173|GO:0005794|GO:0016020|GO:0016757|GO:0009887|GO:0005576|GO:0016021|GO:0030154|GO:0007399	NM_002917	Hs.569700	5986	ENST00000310496
A_24_P935103	0.0154503	1.5453	up	302.981	159.456	7.76905	7.14117	279.147	466.078	46.3091	204.184	152.913	238.68	7.75117	8.51886	6.9138	7.53538	6.75855	7.25292	NM_001116	chr16:004012826-004012767	ADCY9	Homo sapiens adenylate cyclase 9 (ADCY9), mRNA [NM_001116]	GO:0009755|GO:0004016|GO:0000287|GO:0005886|GO:0000166|GO:0005887|GO:0006171|GO:0007189|GO:0034199|GO:0007193|GO:0005524	NM_001116	Hs.391860	115	ENST00000294016
A_33_P3371089	0.0469187	1.50831	up	3613.64	2128.44	11.3789	10.786	2486.3	3112.37	370.085	3213.13	3528.94	4515.43	10.6244	11.1937	10.5997	11.4342	11.1339	11.5089	NM_019072	chr5:064961838-064961779	SGTB	Homo sapiens small glutamine-rich tetratricopeptide repeat (TPR)-containing, beta (SGTB), mRNA [NM_019072]	GO:0005488	NM_019072	Hs.482301	54557	ENST00000381007
A_32_P167904	0.0499237	1.74082	up	215.828	97.0081	7.40799	6.60822	102.769	162.051	39.8968	247.419	148.358	238.014	6.46352	7.18385	6.63661	7.79034	6.72452	7.24976	NM_138286	chr19:023922803-023922744	ZNF681	Homo sapiens zinc finger protein 681 (ZNF681), mRNA [NM_138286]	GO:0005622|GO:0008270|GO:0005634|GO:0003677|GO:0046872|GO:0045449	NM_138286	Hs.399952	148213	ENST00000360204
A_33_P3296205	0.0359364	1.96156	up	4354.65	1870.59	11.3994	10.4274	1358.22	2564.07	285.884	2096.64	3967.66	8403.24	9.76879	10.9108	10.1896	10.7834	11.324	12.5041	NM_183422	chr13:045007734-045007675	TSC22D1	Homo sapiens TSC22 domain family, member 1 (TSC22D1), transcript variant 1, mRNA [NM_183422]	GO:0005515|GO:0006355|GO:0005737|GO:0003700|GO:0006366|GO:0005634	NM_183422	Hs.507916	8848	ENST00000261489
A_24_P880043	0.0288206	1.71377	up	4916.88	2430.21	11.8616	11.0844	3261.96	4797.39	518.975	3643.91	3509.68	6309.33	11.0046	11.8833	11.1223	11.6323	11.1264	12.0693	NM_032373	chr10:093043866-093043925	PCGF5	Homo sapiens polycomb group ring finger 5 (PCGF5), mRNA [NM_032373]	GO:0005515|GO:0005813|GO:0008270|GO:0046872|GO:0045449	NM_032373	Hs.500512	84333	ENST00000336126
A_33_P3240538	0.0494105	2.16086	up	2754.65	921.919	10.9347	9.82312	1312.93	3446.92	302.479	2503.17	1150.35	2313.85	9.72185	11.3326	10.2884	11.0463	9.45914	10.4252	NM_016262	chr6:112392126-112392067	TUBE1	Homo sapiens tubulin, epsilon 1 (TUBE1), mRNA [NM_016262]	GO:0051258|GO:0000166|GO:0007098|GO:0005874|GO:0005200|GO:0003924|GO:0005525|GO:0000242|GO:0007018	NM_016262	Hs.34851	51175	ENST00000368662
A_33_P3242623	0.0226451	9.18609	up	4095.77	784.539	10.9149	7.7154	167.465	2553.19	22.892	713.566	2163.26	9020.57	7.10154	10.9016	5.65687	9.2262	10.3878	12.6167	NM_014331	chr4:139085492-139085433	SLC7A11	Homo sapiens solute carrier family 7, (cationic amino acid transporter, y+ system) member 11 (SLC7A11), mRNA [NM_014331]	GO:0015327|GO:0015171|GO:0005886|GO:0006865|GO:0009636|GO:0016021	NM_014331	Hs.390594	23657
Test 3 (PBMC + HIV-1 MN Day &) vs Control 1 (No virus control day 7) 1.5 fold down regulated genes
	P-value	Fold change and Regulation		Group--Raw Intensity		Group--Normalized Intensity		Raw Intensity						Normalized Intensity						Annotations
ProbeName	P-value	FCAbsolute	regulation	Test 3(raw)	Control 1(raw)	Test 3(normalized)	Control 1(normalized)	[22-17, Control 1](raw)	[22-37, Test 3](raw)	[43-17, Control 1](raw)	[43-37, Test 3](raw)	[P1-7, Control 1](raw)	[P3-7, Test 3](raw)	[22-17, Control 1](normalized)	[22-37, Test 3](normalized)	[43-17, Control 1](normalized)	[43-37, Test 3](normalized)	[P1-7, Control 1](normalized)	[P3-7, Test 3](normalized)	GenbankAccession	GenomicCoordinates	GeneSymbol	Description	Go	RefSeqAccession	UniGeneID	EntrezGeneID	EnsemblID	TIGRID
A_23_P31135	0.0103123	2.14805	down	3450.56	6097.88	11.3212	12.4243	9385.01	3277.63	1290.38	3226.98	7618.23	3847.07	12.5789	11.2728	12.3592	11.4431	12.3347	11.2478	NM_005891	chr6:160199814-160199873	ACAT2	Homo sapiens acetyl-Coenzyme A acetyltransferase 2 (ACAT2), mRNA [NM_005891]	GO:0006629|GO:0005515|GO:0005737|GO:0008152|GO:0003985|GO:0016740|GO:0008415	NM_005891	Hs.571037	39	ENST00000367048
A_32_P210642	0.0115501	1.73902	down	149.634	220.418	6.75768	7.55596	216.328	101.788	55.2611	88.1699	389.666	258.944	7.42533	6.56677	7.25804	6.34939	7.98452	7.35689	NM_201446	chr9:139566984-139567043	EGFL7	Homo sapiens EGF-like-domain, multiple 7 (EGFL7), transcript variant 2, mRNA [NM_201446]	GO:0030336|GO:0001568|GO:0005509|GO:0007275|GO:0005576|GO:0001525|GO:0005615|GO:0001570	NM_201446	Hs.91481	51162	ENST00000308874	NP1179092
A_23_P388812	0.0310663	1.56543	down	229.004	334.646	7.12384	7.7704	495.9	275.996	39.8099	59.1056	468.228	351.912	8.44304	7.86304	6.63309	5.75952	8.23507	7.74896	NM_152515	chr2:113495817-113495758	CKAP2L	Homo sapiens cytoskeleton associated protein 2-like (CKAP2L), mRNA [NM_152515]		NM_152515	Hs.434250	150468	ENST00000435431
A_23_P30736	0.0205958	1.68658	down	1052.97	1032.39	9.43785	10.192	1265.98	736.285	610.921	1652.39	1220.27	770.222	9.67625	9.11227	11.3523	10.4075	9.5473	8.79376	NM_002120	chr6:032780722-032780663	HLA-DOB	Homo sapiens major histocompatibility complex, class II, DO beta (HLA-DOB), mRNA [NM_002120]	GO:0005622|GO:0006955|GO:0005886|GO:0002504|GO:0042613|GO:0016021|GO:0032395|GO:0005764	NM_002120	Hs.1802	3112	ENST00000426644
A_23_P24444	0.0180614	1.97466	down	1891.58	2959.66	10.3721	11.3537	5639.34	2229.72	787.704	1814.21	2451.93	1630.81	11.7906	10.6921	11.6956	10.564	10.5749	9.86013	NM_001360	chr11:071145573-071145514	DHCR7	Homo sapiens 7-dehydrocholesterol reductase (DHCR7), transcript variant 1, mRNA [NM_001360]	GO:0005515|GO:0001568|GO:0005783|GO:0030324|GO:0045540|GO:0047598|GO:0009791|GO:0030154|GO:0005640|GO:0016020|GO:0035264|GO:0042127|GO:0005789|GO:0016491|GO:0016021|GO:0055114	NM_001360	Hs.503134	1717	ENST00000407721
A_23_P137035	0.0261587	1.95695	down	531.063	913.796	8.1329	9.1015	1178.78	474.247	77.548	111.559	1485.06	1007.38	9.57725	8.54389	7.90124	6.69395	9.82601	9.16085	NM_003662	chrX:015403117-015403058	PIR	Homo sapiens pirin (iron-binding nuclear protein) (PIR), transcript variant 1, mRNA [NM_003662]	GO:0003712|GO:0006366|GO:0005506|GO:0005634|GO:0046872	NM_003662	Hs.495728	8544	ENST00000380421
A_23_P310350	0.0325775	1.66778	down	1262.75	1579.4	9.77803	10.516	2424.85	1373.33	417.199	1068.24	1896.14	1346.69	10.5845	9.99136	10.7819	9.77106	10.1814	9.57168	NM_013276	chr17:003512057-003511998	SHPK	Homo sapiens sedoheptulokinase (SHPK), mRNA [NM_013276]	GO:0050277|GO:0005737|GO:0000166|GO:0005975|GO:0005524|GO:0016740	NM_013276	Hs.579217	23729	ENST00000225519
A_23_P120270	0.000835	1.77889	down	586.291	873.178	8.62279	9.45376	891.921	425.098	164.881	388.172	1562.73	945.602	9.19108	8.39893	9.27144	8.39653	9.89877	9.0729	NM_139279	chr2:047132606-047132547	MCFD2	Homo sapiens multiple coagulation factor deficiency 2 (MCFD2), mRNA [NM_139279]	GO:0005793|GO:0005794|GO:0005783|GO:0005509|GO:0005576|GO:0016192|GO:0015031|GO:0019752	NM_139279	Hs.293689	90411	ENST00000409218
A_23_P36641	0.0271921	1.62069	down	829.978	913.153	9.16437	9.86097	1063.6	639.455	341.91	1098.57	1333.95	751.91	9.42771	8.91864	10.4828	9.81447	9.67238	8.76001	NM_020661	chr12:008755209-008755150	AICDA	Homo sapiens activation-induced cytidine deaminase (AICDA), mRNA [NM_020661]	GO:0006397|GO:0005515|GO:0005737|GO:0016787|GO:0045190|GO:0030183|GO:0004126|GO:0016445|GO:0008270|GO:0046872	NM_020661	Hs.149342	57379	ENST00000229335
A_23_P131024	0.0207115	2.02509	down	3434.94	6064.39	11.1307	12.1487	11201.8	5473.49	705.226	1531.55	6286.19	3299.77	12.8421	12.101	11.5546	10.3035	12.0492	10.9876	NM_014383	chr19:036207866-036207925	ZBTB32	Homo sapiens zinc finger and BTB domain containing 32 (ZBTB32), mRNA [NM_014383]	GO:0005515|GO:0030097|GO:0003714|GO:0003704|GO:0005634|GO:0000122|GO:0000228|GO:0001817|GO:0003677|GO:0046872|GO:0005622|GO:0042098|GO:0005654|GO:0008270|GO:0045449	NM_014383	Hs.99430	27033	ENST00000262630
A_23_P109677	0.0182122	1.9481	down	1856.44	2661.69	10.3474	11.3095	3523.67	1654.3	730.503	1618.22	3730.89	2296.82	11.1034	10.2551	11.6011	10.3765	11.224	10.4107		chr3:60676328-60676269							ENST00000450815
A_33_P3474319	0.0355287	2.46298	down	466.817	1219.61	7.69568	8.99609	233.936	111.281	102.12	145.541	3322.78	1143.63	7.52629	6.6886	8.42145	7.06217	11.0405	9.33628	NM_198277	chr11:124959065-124959124	SLC37A2	Homo sapiens solute carrier family 37 (glycerol-3-phosphate transporter), member 2 (SLC37A2), transcript variant 1, mRNA [NM_198277]	GO:0016020|GO:0008643|GO:0016021|GO:0055085	NM_198277	Hs.352661	219855	ENST00000403796	NP868942
A_23_P101992	0.0476141	1.58873	down	922.605	1264.23	6.33665	7.00452	50.7514	30.3949	10.1991	12.2807	3731.75	2725.14	5.42582	4.93198	4.36307	3.39404	11.2247	10.6839	NM_006770	chr2:119751977-119752036	MARCO	Homo sapiens macrophage receptor with collagenous structure (MARCO), mRNA [NM_006770]	GO:0016020|GO:0005887|GO:0007166|GO:0008329|GO:0005044	NM_006770	Hs.67726	8685	ENST00000410021
A_23_P76034	0.0167512	1.75243	down	57.0716	87.0897	5.62486	6.43422	88.3804	42.9821	35.1106	60.8874	137.778	67.3453	6.26103	5.4095	6.41351	5.80532	6.62812	5.65976	NM_203286	chr11:119547906-119547847	PVRL1	Homo sapiens poliovirus receptor-related 1 (herpesvirus entry mediator C) (PVRL1), transcript variant 3, mRNA [NM_203286]	GO:0030424|GO:0005792|GO:0051963|GO:0060041|GO:0046982|GO:0005886|GO:0046790|GO:0045202|GO:0016342|GO:0005576|GO:0046718|GO:0015026|GO:0042803|GO:0006955|GO:0005913|GO:0002089|GO:0007411|GO:0044419|GO:0016021|GO:0019717|GO:0050839|GO:0007156|GO:0007157	NM_203286	Hs.334846	5818	ENST00000340882
A_33_P3350863	0.0425892	2.97517	down	37.6	116.372	4.96279	6.53577	58.7611	19.1567	37.8059	46.8339	252.548	46.8095	5.66158	4.30289	6.54296	5.41338	7.40276	5.1721	NM_020415	chr19:007735274-007735333	RETN	Homo sapiens resistin (RETN), mRNA [NM_020415]	GO:0032868|GO:0008150|GO:0005179|GO:0045444|GO:0005634|GO:0005576|GO:0005615	NM_020415	Hs.283091	56729	ENST00000381324
A_33_P3209960	0.00221323	1.68246	down	3747.76	4119.58	11.2728	12.0234	7194.47	3749.04	2540.38	5768.23	2623.88	1726	12.1717	11.4713	13.2173	12.3985	10.6812	9.94874	NM_153819	chr11:064508476-064508417	RASGRP2	Homo sapiens RAS guanyl releasing protein 2 (calcium and DAG-regulated) (RASGRP2), transcript variant 2, mRNA [NM_153819]	GO:0051056|GO:0030054|GO:0005886|GO:0005509|GO:0045202|GO:0007265|GO:0042995|GO:0001558|GO:0005829|GO:0019992|GO:0005085|GO:0005622|GO:0005737|GO:0008270|GO:0019717|GO:0019898	NM_153819	Hs.99491	10235	ENST00000377489
A_24_P84880	0.00168858	1.60777	down	479.109	693.716	8.3797	9.06476	1183.18	652.46	118.667	276.632	779.297	508.235	9.58291	8.94865	8.68025	7.94862	8.93112	8.24184	NR_002929	chr1:202843170-202843229	LOC148709	Homo sapiens actin pseudogene (LOC148709), non-coding RNA [NR_002929]		NR_002929	Hs.162880	148709
A_23_P341503	0.022788	1.62542	down	41.5092	53.7617	5.18872	5.88952	75.4232	46.625	31.489	44.6763	54.3729	33.2262	6.03209	5.52333	6.21934	5.33827	5.41715	4.70454	NM_178339	chr3:037441068-037441127	C3orf35	Homo sapiens chromosome 3 open reading frame 35 (C3orf35), transcript variant B, mRNA [NM_178339]	GO:0016020|GO:0016021	NM_178339	Hs.475945	339883	ENST00000332506	NP796928
A_33_P3306413	0.0340529	1.67503	down	41.9335	58.508	5.19315	5.93734	80.6765	44.2055	27.3812	34.7505	67.4662	46.8446	6.12874	5.44612	5.97282	4.9596	5.71044	5.17371	NM_213726	chr17:004891704-004891645	INCA1	Homo sapiens inhibitor of CDK, cyclin A1 interacting protein 1 (INCA1), mRNA [NM_213726]	GO:0005634	NM_213726	Hs.658926	388324	ENST00000396829	NP1214658
A_23_P169503	0.021747	1.5597	down	39.9399	47.9445	5.13581	5.77708	55.2169	32.3845	33.3575	48.9997	55.2589	38.4353	5.57001	5.02211	6.32217	5.48864	5.43906	4.89668	NM_001807	chr9:135945982-135946041	CEL	Homo sapiens carboxyl ester lipase (bile salt-stimulated lipase) (CEL), mRNA [NM_001807]	GO:0006707|GO:0004806|GO:0005576|GO:0030157|GO:0018350|GO:0009062|GO:0016042|GO:0030299|GO:0005737|GO:0016787|GO:0047372|GO:0006641|GO:0046514|GO:0044258|GO:0008201|GO:0004771	NM_001807	Hs.533258	1056	ENST00000303626
A_23_P122233	0.0298223	1.61446	down	2824.84	3659.61	10.9995	11.6906	6174.27	3021.05	861.877	2395.9	3942.68	3057.57	11.9469	11.1536	11.8106	10.9786	11.3143	10.8664	NM_001014990	chr5:154346304-154346363	MRPL22	Homo sapiens mitochondrial ribosomal protein L22 (MRPL22), nuclear gene encoding mitochondrial protein, transcript variant 2, mRNA [NM_001014990]	GO:0005739|GO:0005622|GO:0003735|GO:0015934|GO:0005840|GO:0006412	NM_001014990	Hs.483924	29093	ENST00000342738
A_23_P70249	0.0360705	1.77209	down	241.579	396.481	7.11307	7.93852	639.667	348.29	41.0566	50.795	508.721	325.652	8.77823	8.14798	6.68669	5.5415	8.35064	7.64971	NM_001790	chr5:137621299-137621240	CDC25C	Homo sapiens cell division cycle 25 homolog C (S. pombe) (CDC25C), transcript variant 1, mRNA [NM_001790]	GO:0005515|GO:0007088|GO:0008283|GO:0050699|GO:0005634|GO:0000079|GO:0005575|GO:0007089|GO:0005829|GO:0005622|GO:0006260|GO:0005737|GO:0007049|GO:0006470|GO:0016787|GO:0044419|GO:0005654|GO:0004725|GO:0051301	NM_001790	Hs.656	995	ENST00000356505
A_33_P3305023	0.0217511	1.79827	down	102.131	151.238	6.44263	7.28924	224.897	103.384	63.6759	96.3289	165.141	106.681	7.47982	6.59087	7.52417	6.48194	6.86373	6.25508	NM_130844	chr16:078134036-078134095	WWOX	Homo sapiens WW domain containing oxidoreductase (WWOX), transcript variant 3, mRNA [NM_130844]	GO:0050662|GO:0005794|GO:0030178|GO:0048705|GO:0005634|GO:0006917|GO:0001649|GO:0005739|GO:0005737|GO:0016491|GO:0046983|GO:0008202|GO:0055114	NM_130844	Hs.461453	51741
A_23_P100868	0.0287794	1.70795	down	608.536	839.723	8.7461	9.51837	1503.83	814.407	207.326	460.363	808.013	550.838	9.90635	9.25265	9.67103	8.63149	8.97772	8.35416	NM_001033580	chr17:034869010-034868951	MYO19	Homo sapiens myosin XIX (MYO19), transcript variant 3, mRNA [NM_001033580]	GO:0005737|GO:0003774|GO:0000166|GO:0003779|GO:0016459|GO:0005524	NM_001033580	Hs.302051	80179
A_23_P114826	0.0288991	1.70282	down	5101.75	6812.48	11.9628	12.7308	11033.7	5095.27	2481.06	5211.22	6922.73	4998.77	12.8166	11.9823	13.1856	12.227	12.19	11.6792	NM_031280	chr1:036921953-036921894	MRPS15	Homo sapiens mitochondrial ribosomal protein S15 (MRPS15), nuclear gene encoding mitochondrial protein, mRNA [NM_031280]	GO:0005739|GO:0005622|GO:0003735|GO:0005840|GO:0006412|GO:0005763	NM_031280	Hs.352839	64960	ENST00000373116
A_23_P18579	0.0120292	2.23007	down	3431.4	6551.52	11.1476	12.3047	9146.85	3843.47	770.433	1481.22	9737.28	4969.51	12.5526	11.518	11.6691	10.256	12.6922	11.6687	NM_006607	chr4:037962342-037962401	PTTG2	Homo sapiens pituitary tumor-transforming 2 (PTTG2), mRNA [NM_006607]	GO:0003674|GO:0051276|GO:0017124|GO:0005737|GO:0005634|GO:0006259|GO:0005575	NM_006607	Hs.668806	10744	ENST00000352433
A_23_P90130	0.0399572	1.77614	down	554.901	723.472	8.51805	9.3468	642.514	321.044	197.415	397.624	1330.49	946.034	8.78427	8.05147	9.58888	8.42818	9.66726	9.0745	NM_004851		NAPSA	Homo sapiens napsin A aspartic peptidase (NAPSA), mRNA [NM_004851]	GO:0006508|GO:0008233|GO:0004190	NM_004851	Hs.512843	9476	ENST00000253719
A_33_P3308050	0.00112036	1.5108	down	7795.32	9658.67	12.65	13.2454	14715.8	7580.62	3546.4	8590.25	10713.8	7215.07	13.2632	12.6287	13.6322	13.05	12.8407	12.2714	NM_004846	chr2:233431864-233431923	EIF4E2	Homo sapiens eukaryotic translation initiation factor 4E family member 2 (EIF4E2), mRNA [NM_004846]	GO:0005515|GO:0000339|GO:0005737|GO:0003743|GO:0006417|GO:0006413	NM_004846	Hs.292026	9470	ENST00000409322
A_33_P3339446	0.0493273	1.58179	down	45.423	52.3222	5.29718	5.95874	61.6559	36.0675	43.0906	61.3584	52.2201	38.8432	5.73321	5.16292	6.77507	5.8156	5.36793	4.91301	XM_001132281	chr1:004005377-004005436	hCG_2036596	PREDICTED: Homo sapiens hCG2036596, transcript variant 2 (LOC728716), mRNA [XM_001132281]		XM_001132281	Hs.668359	728716
A_23_P5441	0.048641	1.50108	down	904.351	1104.35	9.25915	9.84515	1516.09	1046.28	209.796	570.397	1587.15	1096.38	9.91754	9.58802	9.69593	8.91328	9.92199	9.27615	NM_005689	chr2:220074557-220074498	ABCB6	Homo sapiens ATP-binding cassette, sub-family B (MDR/TAP), member 6 (ABCB6), nuclear gene encoding mitochondrial protein, mRNA [NM_005689]	GO:0006879|GO:0005739|GO:0016020|GO:0000166|GO:0042626|GO:0005741|GO:0016021|GO:0005740|GO:0055085|GO:0043190|GO:0016887|GO:0005524	NM_005689	Hs.107911	10058	ENST00000443805
A_33_P3345782	0.010075	1.56131	down	72.6811	90.5124	5.96962	6.61238	129.268	70.9488	46.256	90.5882	96.0134	56.5063	6.76214	6.09821	6.91237	6.39129	6.16263	5.41936		chr11:64118923-64118982		Coiled-coil domain-containing protein 88B (Brain leucine zipper domain-containing protein)(Hook-related protein 3)(HkRP3) [Source:UniProtKB/Swiss-Prot;Acc:A6NC98] [ENST00000318701]					ENST00000318701
A_23_P28434	0.0436072	1.57058	down	25171.8	34162.3	14.4848	15.1361	43565.2	23407.1	19618.4	27068.6	39303.1	25039.8	14.9273	14.4172	15.7125	14.7799	14.7685	14.2573	NM_003761	chr2:085809032-085809091	VAMP8	Homo sapiens vesicle-associated membrane protein 8 (endobrevin) (VAMP8), mRNA [NM_003761]	GO:0005515|GO:0006461|GO:0016020|GO:0006944|GO:0006892|GO:0031201|GO:0005624|GO:0016021|GO:0016192|GO:0005769	NM_003761	Hs.714302	8673	ENST00000432071
A_23_P111888	0.00191564	2.78853	down	149.119	485.148	6.55461	8.03412	912.731	248.793	37.6855	40.1773	505.026	158.387	9.22437	7.73149	6.53694	5.17585	8.34104	6.7565	NM_138455	chr8:104390268-104390327	CTHRC1	Homo sapiens collagen triple helix repeat containing 1 (CTHRC1), mRNA [NM_138455]	GO:0016477|GO:0005578|GO:0005576	NM_138455	Hs.405614	115908	ENST00000297577	NP1157757
A_23_P116614	0.0360095	1.50867	down	690.616	872.319	8.11016	8.70344	349.566	211.809	69.2795	126.057	2198.11	1733.98	8.01281	7.51084	7.68685	6.86373	10.4107	9.95593	NM_001014811	chr11:086152353-086152294	ME3	Homo sapiens malic enzyme 3, NADP(+)-dependent, mitochondrial (ME3), nuclear gene encoding mitochondrial protein, transcript variant 2, mRNA [NM_001014811]	GO:0009060|GO:0005739|GO:0048037|GO:0051287|GO:0006090|GO:0006800|GO:0005759|GO:0016491|GO:0004473|GO:0006108|GO:0046872|GO:0055114	NM_001014811	Hs.199743	10873	ENST00000393324
A_23_P108751	0.0387192	1.90895	down	414.238	586.163	8.26931	9.20209	984.269	451.288	228.196	431.624	546.024	359.803	9.32176	8.48082	9.8431	8.54671	8.44141	7.7804	NM_001039492	chr2:105977361-105977302	FHL2	Homo sapiens four and a half LIM domains 2 (FHL2), transcript variant 5, mRNA [NM_001039492]	GO:0030018|GO:0006357|GO:0003713|GO:0005634|GO:0050681|GO:0031430|GO:0046872|GO:0001649|GO:0042802|GO:0005737|GO:0008270|GO:0009725|GO:0045893|GO:0005856|GO:0005925|GO:0045449|GO:0030521	NM_001039492	Hs.443687	2274	ENST00000358129	NP1180779
A_23_P256682	0.00760296	1.51598	down	3571.26	4492.62	11.3681	11.9684	7368.91	3905.79	969.822	3308.55	5139.13	3499.44	12.2073	11.5398	11.972	11.4755	11.7258	11.0891	NM_014481	chrX:055034072-055034131	APEX2	Homo sapiens APEX nuclease (apurinic/apyrimidinic endonuclease) 2 (APEX2), nuclear gene encoding mitochondrial protein, mRNA [NM_014481]	GO:0005739|GO:0005622|GO:0003906|GO:0006281|GO:0004519|GO:0005743|GO:0008270|GO:0005634|GO:0003677|GO:0016829|GO:0006974	NM_014481	Hs.659558	27301	ENST00000374987
A_23_P62731	0.00307085	1.505	down	5369.36	6410.94	12.0468	12.6366	9839.71	5435.45	2135.51	5599.65	7257.59	5072.98	12.6506	12.0898	13.0006	12.3455	12.2585	11.7051	NM_022100	chr1:174983720-174983661	MRPS14	Homo sapiens mitochondrial ribosomal protein S14 (MRPS14), nuclear gene encoding mitochondrial protein, mRNA [NM_022100]	GO:0005739|GO:0005622|GO:0005515|GO:0003735|GO:0005761|GO:0005840|GO:0006412	NM_022100	Hs.702192	63931	ENST00000476371
A_24_P196117	0.0442124	1.55084	down	4882.09	5542.83	11.8859	12.519	7672.7	4424.62	2472.11	5383.22	6483.69	4838.43	12.2744	11.7572	13.1825	12.2751	12.1	11.6255	NM_207118	chr6:158613211-158613270	GTF2H5	Homo sapiens general transcription factor IIH, polypeptide 5 (GTF2H5), mRNA [NM_207118]	GO:0005634|GO:0006289|GO:0003677|GO:0045449|GO:0006974	NM_207118	Hs.356224	404672	ENST00000367100
A_23_P151368	0.0131671	1.68678	down	1519.11	1719.14	10.0391	10.7934	2649.58	1340.82	702.246	1917.98	1805.58	1298.53	10.7217	9.95318	11.5484	10.6504	10.1101	9.51383	NM_174928	chr13:021303314-021303255	N6AMT2	Homo sapiens N-6 adenine-specific DNA methyltransferase 2 (putative) (N6AMT2), mRNA [NM_174928]	GO:0008168|GO:0003676|GO:0032259|GO:0016740	NM_174928	Hs.26674	221143	ENST00000382754
A_24_P366415	0.00151714	1.88095	down	1341.67	1939.33	9.87384	10.7853	2775.42	1230.73	447.497	1289.84	2595.08	1504.45	10.7871	9.82714	10.9016	10.0594	10.6671	9.73494	XM_001721772	chr2:174350887-174350828	LOC643997	PREDICTED: Homo sapiens similar to TRIMCyp, transcript variant 1 (LOC643997), mRNA [XM_001721772]		XM_001721772		643997
A_23_P107644	0.0236412	1.60895	down	8690.56	11117.2	12.7159	13.402	20643.9	11561.7	5141.64	9770.1	7566.11	4739.9	13.7668	13.2866	14.1142	13.2723	12.3251	11.5888	NM_006938	chr18:019209071-019209130	SNRPD1	Homo sapiens small nuclear ribonucleoprotein D1 polypeptide 16kDa (SNRPD1), mRNA [NM_006938]	GO:0008380|GO:0005515|GO:0000245|GO:0005737|GO:0003723|GO:0030532|GO:0005681|GO:0005654|GO:0005634|GO:0000387|GO:0005829	NM_006938	Hs.464734	6632	ENST00000300413
A_33_P3296831	0.00818818	1.61872	down	56.3883	67.9236	5.60599	6.30085	89.5687	47.6357	45.8088	75.2222	68.3932	46.3071	6.27897	5.55053	6.89545	6.11173	5.72812	5.15571	NM_001126242	chr1:003645911-003645970	TP73	Homo sapiens tumor protein p73 (TP73), transcript variant 4, mRNA [NM_001126242]	GO:0030308|GO:0003700|GO:0008630|GO:0002347|GO:0001836|GO:0005634|GO:0009791|GO:0048546|GO:0046872|GO:0006974|GO:0045793|GO:0021766|GO:0002039|GO:0043524|GO:0007049|GO:0006954|GO:0048666|GO:0033326|GO:0007050|GO:0008270|GO:0030900|GO:0006298|GO:0045893|GO:0043508	NM_001126242	Hs.697294	7161	ENST00000378290	NP460436
A_33_P3220670	0.0087204	1.67787	down	56.9268	78.6008	5.64092	6.38755	97.0889	56.012	37.7343	55.8346	100.979	58.9339	6.39543	5.77271	6.5395	5.6738	6.22771	5.47625	BX108667	chr16:59785954-59785895	LOC644649	BX108667 Soares_NFL_T_GBC_S1 Homo sapiens cDNA clone IMAGp998I233958, mRNA sequence [BX108667]			Hs.721083	644649
A_23_P104073	0.00907641	1.78171	down	39.0151	53.7352	5.09462	5.92789	70.6267	31.1583	35.0872	51.3449	55.4915	34.5421	5.92688	4.96653	6.41152	5.5578	5.44527	4.75954	NM_002960	chr1:153520057-153519998	S100A3	Homo sapiens S100 calcium binding protein A3 (S100A3), mRNA [NM_002960]	GO:0005515|GO:0005509|GO:0008270	NM_002960	Hs.557609	6274	ENST00000368712
A_33_P3231833	0.0468814	1.64051	down	430.119	543.702	8.27294	8.98708	1073.87	490.636	209.251	524.687	347.983	275.036	9.44253	8.58244	9.68995	8.80154	7.82876	7.43484		chr20:44482603-44482544		Acyl-coenzyme A thioesterase 8 (EC 3.1.2.27)(Choloyl-coenzyme A thioesterase)(Acyl-CoA thioesterase 8)(Peroxisomal acyl-coenzyme A thioester hydrolase 1)(PTE-1)(Peroxisomal long-chain acyl-CoA thioesterase 1)(HIV-Nef-associated acyl-CoA thioesterase)(Thioesterase II)(hTE)(hACTEIII)(hACTE-III)(PTE-2) [Source:UniProtKB/Swiss-Prot;Acc:O14734] [ENST00000372531]					ENST00000372531
A_33_P3307073	0.0290346	1.58593	down	60.4541	75.8476	5.72418	6.38951	85.9645	53.0997	42.5058	62.9423	99.0725	65.3204	6.22088	5.70288	6.749	5.85501	6.19865	5.61465	DA455367	chr14:51859019-51858960		DA455367 CTONG2 Homo sapiens cDNA clone CTONG2028771 5', mRNA sequence [DA455367]			Hs.578228
A_33_P3245631	0.0115159	1.67179	down	75.4211	94.3024	6.01951	6.76091	126.633	62.6319	58.6756	99.2426	97.5981	64.3888	6.73592	5.92946	7.36806	6.53213	6.17873	5.59694	NM_001080494	chr1:051768238-051768179	TTC39A	Homo sapiens tetratricopeptide repeat domain 39A (TTC39A), transcript variant 2, mRNA [NM_001080494]	GO:0008150|GO:0005488|GO:0005575	NM_001080494	Hs.112949	22996	ENST00000371747
A_23_P155979	0.0241288	1.64008	down	56.2107	68.365	5.58928	6.30305	64.8427	39.8866	48.1779	76.2444	92.0743	52.5012	5.80475	5.31159	6.99602	6.13002	6.10838	5.32625	NM_001963	chr4:110932689-110932748	EGF	Homo sapiens epidermal growth factor (beta-urogastrone) (EGF), mRNA [NM_001963]	GO:0005515|GO:0005154|GO:0005886|GO:0050730|GO:0051048|GO:0021940|GO:0005615|GO:0000186|GO:0030297|GO:0007173|GO:0043406|GO:0031093|GO:0045741|GO:0005509|GO:0005625|GO:0005576|GO:0045840|GO:0001525|GO:0006260|GO:0007165|GO:0050708|GO:0016021|GO:0048754|GO:0008083|GO:0042327	NM_001963	Hs.419815	1950	ENST00000265171
A_33_P3258013	0.0402349	1.87003	down	1268.97	1547.38	9.67526	10.5783	1321.92	627.08	566.303	1237.63	2753.92	1942.18	9.73419	8.89012	11.2478	9.99573	10.753	10.1399	BC051266	chr12:109928340-109928399		Ubiquitin-protein ligase E3B (EC 6.3.2.-) [Source:UniProtKB/Swiss-Prot;Acc:Q7Z3V4] [ENST00000340074]			Hs.374067		ENST00000340074
A_33_P3317073	0.022896	1.85882	down	30.5463	45.8555	4.75472	5.64911	56.233	28.2639	26.7458	30.7839	54.5876	32.5911	5.59929	4.82551	5.92614	4.75702	5.42189	4.68163	NM_173468	chr4:071847715-071847774	MOBKL1A	Homo sapiens MOB1, Mps One Binder kinase activator-like 1A (yeast) (MOBKL1A), mRNA [NM_173468]	GO:0005515|GO:0019209|GO:0005737|GO:0046777|GO:0008270|GO:0005634|GO:0019900|GO:0046872	NM_173468	Hs.700445	92597	ENST00000396051
A_24_P215882	0.0117209	1.57553	down	87.7854	110.344	6.24536	6.9012	150.75	80.6483	54.6844	96.3711	125.597	86.337	6.96337	6.26604	7.23706	6.48322	6.50316	5.98683	NM_001176		ARHGDIG	Homo sapiens Rho GDP dissociation inhibitor (GDI) gamma (ARHGDIG), mRNA [NM_001176]	GO:0007162|GO:0005737|GO:0016023|GO:0007266|GO:0005094|GO:0005096	NM_001176	Hs.647388	398	ENST00000414650	NP1457959
A_33_P3290829	0.0492092	1.64342	down	56.1855	70.7225	5.59139	6.3081	108.877	47.4417	45.5652	77.5286	57.725	43.5863	6.54371	5.5446	6.88137	6.15755	5.4992	5.07203	XM_001714014	chr11:000531190-000531249	LOC100128703	PREDICTED: Homo sapiens hypothetical protein LOC100128703 (LOC100128703), mRNA [XM_001714014]		XM_001714014	Hs.640061	100128703
A_23_P203900	0.0398364	1.84958	down	1574.44	2210.51	9.91826	10.8055	2089	1043.85	382.767	818.614	4159.75	2860.85	10.3675	9.58436	10.6519	9.40952	11.397	10.7609	NM_005505	chr12:125262284-125262225	SCARB1	Homo sapiens scavenger receptor class B, member 1 (SCARB1), transcript variant 1, mRNA [NM_005505]	GO:0005215|GO:0006707|GO:0005886|GO:0006702|GO:0001875|GO:0070328|GO:0031528|GO:0051856|GO:0050764|GO:0005545|GO:0005737|GO:0034384|GO:0044419|GO:0032497|GO:0004872|GO:0007155|GO:0042632|GO:0033344|GO:0009986|GO:0043691|GO:0030169|GO:0043654|GO:0010886|GO:0015920|GO:0010595|GO:0070506|GO:0070508|GO:0043534|GO:0051000|GO:0005887|GO:0005901|GO:0042060|GO:0001935|GO:0006869|GO:0034375|GO:0001786|GO:…	NM_005505	Hs.709216	949	ENST00000261693
A_23_P87310	0.0494664	1.74113	down	72.24	93.0469	5.9668	6.76683	95.8463	62.6588	62.0055	90.84	121.289	63.2211	6.37809	5.93013	7.46899	6.39517	6.45341	5.5751	NM_002315	chr11:008245980-008245921	LMO1	Homo sapiens LIM domain only 1 (rhombotin 1) (LMO1), mRNA [NM_002315]	GO:0003700|GO:0008283|GO:0008270|GO:0007275|GO:0005634|GO:0046872	NM_002315	Hs.654426	4004	ENST00000335790
A_33_P3410821	0.00472005	1.75823	down	33.9575	48.9224	4.91508	5.7292	72.1458	32.8761	28.3349	41.6955	46.2864	27.3008	5.95961	5.03873	6.02606	5.23526	5.20194	4.47126	XM_001717847	chr15:034875886-034875827	LOC100134360	PREDICTED: Homo sapiens hypothetical LOC100134360 (LOC100134360), mRNA [XM_001717847]		XM_001717847		100134360
A_23_P80643	0.0367349	1.50354	down	1948.01	2049.91	10.3976	10.986	3302.45	1594.82	718.457	2570.92	2128.82	1678.3	11.0196	10.2012	11.5807	11.0815	10.3576	9.91011	NM_006515	chr3:004358640-004358699	SETMAR	Homo sapiens SET domain and mariner transposase fusion gene (SETMAR), mRNA [NM_006515]	GO:0006281|GO:0008168|GO:0008270|GO:0005634|GO:0005575|GO:0006313|GO:0003677|GO:0016740|GO:0006974|GO:0004803|GO:0018024|GO:0016568	NM_006515	Hs.716054	6419	ENST00000406657
A_23_P104116	0.0476868	1.57247	down	11104.1	15824	13.2101	13.8631	28045.2	12945.2	5026.1	9568.77	14400.7	10798.3	14.2288	13.4722	14.0818	13.2406	13.2788	12.9176	NM_005105	chr14:060865033-060865092	RBM8A	Homo sapiens RNA binding motif protein 8A (RBM8A), mRNA [NM_005105]	GO:0005515|GO:0008380|GO:0005634|GO:0003729|GO:0006417|GO:0008150|GO:0005737|GO:0000166|GO:0000184|GO:0016607|GO:0000398|GO:0006810|GO:0005681|GO:0051028|GO:0035145	NM_005105	Hs.719989	9939	ENST00000369307
A_24_P68991	0.0140914	1.53138	down	33.7535	40.1585	4.8844	5.49924	49.8108	26.2552	28.2321	44.0801	42.4325	30.9252	5.39424	4.72021	6.01974	5.31746	5.08373	4.61552	NM_006168		NKX6-1	Homo sapiens NK6 homeobox 1 (NKX6-1), mRNA [NM_006168]	GO:0006355|GO:0003700|GO:0048709|GO:0045686|GO:0005634|GO:0007275|GO:0045687|GO:0030154|GO:0007224|GO:0043565|GO:0045666|GO:0031018|GO:0009887|GO:0032024|GO:0044424|GO:0021912|GO:0021913	NM_006168	Hs.546270	4825	ENST00000295886
A_24_P673063	0.0454923	2.72033	down	1925.58	3836.18	10.1951	11.6388	4953.15	1561.22	622.892	791.749	5932.51	3423.77	11.5905	10.1667	11.375	9.36907	11.9511	11.0494	NM_001444	chr7:152139847-152139906	FABP5	Homo sapiens fatty acid binding protein 5 (psoriasis-associated) (FABP5), mRNA [NM_001444]	GO:0006629|GO:0005515|GO:0005215|GO:0005737|GO:0005504|GO:0008544|GO:0006810	NM_001444	Hs.408061	2171	ENST00000396359
A_24_P933011	0.0371239	1.70935	down	55.8129	64.1978	5.48238	6.25582	81.9241	45.1032	48.6049	93.8122	62.0645	28.5234	6.15361	5.47625	7.0161	6.44681	5.59776	4.52408	NM_001080209	chr18:005891958-005891899	TMEM200C	Homo sapiens transmembrane protein 200C (TMEM200C), mRNA [NM_001080209]	GO:0016020|GO:0016021	NM_001080209	Hs.346566	645369	ENST00000383490
A_23_P52227	0.0396872	1.62019	down	1047.35	1663.71	8.14952	8.84568	1604.1	1051.63	20.5438	28.2101	3366.49	2062.19	10.0058	9.59521	5.47024	4.61896	11.061	10.2344	NM_004962	chr10:048425995-048425936	GDF10	Homo sapiens growth differentiation factor 10 (GDF10), mRNA [NM_004962]	GO:0001501|GO:0030278|GO:0007179|GO:0005576|GO:0008083|GO:0005615|GO:0005125	NM_004962	Hs.2171	2662	ENST00000224605
A_23_P211428	0.020965	2.20454	down	547.992	1006.38	8.43188	9.57235	1220.3	373.499	150.907	269.346	1647.94	1001.13	9.62659	8.23476	9.11771	7.91039	9.97275	9.15049	NM_134269	chr22:031500343-031500402	SMTN	Homo sapiens smoothelin (SMTN), transcript variant 2, mRNA [NM_134269]	GO:0006939|GO:0005737|GO:0007517|GO:0003779|GO:0015629|GO:0008307	NM_134269	Hs.149098	6525	ENST00000329852
A_23_P213706	0.0406119	2.42962	down	732.435	2524.36	7.56068	8.84141	7376.44	2035.16	76.6837	94.1869	119.965	67.9583	12.2087	10.5569	7.87843	6.45237	6.43709	5.67273	NM_000589	chr5:132018196-132018255	IL4	Homo sapiens interleukin 4 (IL4), transcript variant 1, mRNA [NM_000589]	GO:0005515|GO:0005136|GO:0048295|GO:0030890|GO:0042523|GO:0050731|GO:0045189|GO:0005615|GO:0043193|GO:0045348|GO:0042104|GO:0051091|GO:0042092|GO:0006935|GO:0045944|GO:0030183|GO:0008203|GO:0043066|GO:0045191|GO:0005576|GO:0045671|GO:0005125|GO:0042325|GO:0006968|GO:0050776|GO:0008083|GO:0048304	NM_000589	Hs.73917	3565	ENST00000350025
A_33_P3807062	0.0306086	1.63353	down	2406.03	3778.33	10.197	10.905	5495.42	2571.98	148.214	342.307	5691.36	4303.79	11.7468	10.9163	9.0849	8.24585	11.8833	11.4288	NM_018410	chr2:234746088-234746029	HJURP	Homo sapiens Holliday junction recognition protein (HJURP), mRNA [NM_018410]	GO:0034080|GO:0042393|GO:0007049|GO:0005737|GO:0007059|GO:0005694|GO:0005730|GO:0000777|GO:0005634|GO:0003677|GO:0000775|GO:0034509	NM_018410	Hs.532968	55355	ENST00000433484
A_33_P3268507	0.0105552	1.63403	down	638.971	809.537	8.81582	9.52426	1402.03	800.868	221.271	643.344	805.309	472.701	9.81276	9.22945	9.78593	9.08129	8.97408	8.13672	NM_001024912	chr19:043025514-043025455	CEACAM1	Homo sapiens carcinoembryonic antigen-related cell adhesion molecule 1 (biliary glycoprotein) (CEACAM1), transcript variant 2, mRNA [NM_001024912]	GO:0003674|GO:0016477|GO:0005886|GO:0007229|GO:0005887|GO:0005624|GO:0005576|GO:0001525|GO:0007156	NM_001024912	Hs.512682	634	ENST00000403136	NP074191
A_24_P375227	0.0275863	2.05235	down	67.8504	105.604	5.88748	6.92476	117.366	61.0991	63.6755	78.1482	135.77	64.3039	6.64039	5.89579	7.52381	6.17101	6.61007	5.59564
A_24_P74070	0.0192448	2.15075	down	105.812	251.675	6.26837	7.37321	370.179	151.513	30.842	42.748	354.005	123.173	8.08679	7.09715	6.18255	5.27033	7.85028	6.43762	NM_032510	chr18:077915404-077915345	PARD6G	Homo sapiens par-6 partitioning defective 6 homolog gamma (C. elegans) (PARD6G), mRNA [NM_032510]	GO:0005515|GO:0007049|GO:0005737|GO:0030054|GO:0005886|GO:0005923|GO:0051301	NM_032510	Hs.654920	84552	ENST00000353265
A_33_P3336587	0.0368721	1.99589	down	102.506	183.413	6.44565	7.44268	285.768	101.019	60.3159	121.263	204.156	85.2362	7.77806	6.55496	7.41695	6.81228	7.13303	5.96971	XM_211174	chr15:031515097-031515038	LOC283710	PREDICTED: Homo sapiens hypothetical LOC283710 (LOC283710), mRNA [XM_211174]		XM_211174	Hs.591097	283710
A_23_P122414	0.000874763	1.69037	down	41.973	56.6095	5.12336	5.8807	46.712	22.3349	32.0701	48.8966	91.0464	54.6874	5.2959	4.50601	6.25242	5.48467	6.09377	5.3794	NM_000409	chr6:042146541-042146600	GUCA1A	Homo sapiens guanylate cyclase activator 1A (retina) (GUCA1A), mRNA [NM_000409]	GO:0007165|GO:0016020|GO:0005509|GO:0031225|GO:0007601|GO:0050896|GO:0008048	NM_000409	Hs.92858	2978	ENST00000372958
A_23_P166633	0.0337582	1.52096	down	554.072	820.172	7.76176	8.36674	271.335	184.411	48.7128	87.5451	2140.47	1390.26	7.71452	7.33353	7.01927	6.3397	10.3664	9.61204	NM_002213	chr3:124482550-124482491	ITGB5	Homo sapiens integrin, beta 5 (ITGB5), mRNA [NM_002213]	GO:0005515|GO:0008305|GO:0007160|GO:0005886|GO:0007229|GO:0004872|GO:0016021|GO:0007155	NM_002213	Hs.536663	3693	ENST00000296181
A_24_P16143	0.0433265	1.84113	down	47.0662	81.3834	5.29501	6.17561	53.6136	32.0282	31.0287	40.5549	159.508	68.6155	5.51516	5.00598	6.19417	5.1933	6.81748	5.68576	NM_001007540	chr3:049836531-049836472	CDH29	Homo sapiens cadherin-like 29 (CDH29), mRNA [NM_001007540]	GO:0005515|GO:0016020|GO:0005509|GO:0016021|GO:0007155|GO:0007156	NM_001007540	Hs.363312	389118	ENST00000487256
A_32_P204676	0.0390466	2.01261	down	3272.8	6135.84	11.0791	12.0882	8836.74	2874.92	546.809	1582.09	9023.97	5361.39	12.4991	11.082	11.1953	10.3481	12.5702	11.8073	NM_001444	chr8:082195616-082195675	FABP5	Homo sapiens fatty acid binding protein 5 (psoriasis-associated) (FABP5), mRNA [NM_001444]	GO:0006629|GO:0005515|GO:0005215|GO:0005737|GO:0005504|GO:0008544|GO:0006810	NM_001444	Hs.408061	2171	ENST00000396359
A_32_P133767	0.0497942	1.5374	down	397.154	382.312	8.06147	8.68196	231.988	160.786	216.813	577.745	698.135	452.93	7.51784	7.17572	9.75242	8.92955	8.77561	8.07912	NM_198521	chrY:023005074-023005015	C12orf42	Homo sapiens chromosome 12 open reading frame 42 (C12orf42), transcript variant 1, mRNA [NM_198521]		NM_198521	Hs.534649	374470	ENST00000378113
A_24_P77364	0.0140281	2.08389	down	5728.71	10163.4	12.1434	13.2026	18601.8	6536.91	3146.38	5536.28	8742.12	5112.93	13.6123	12.3805	13.4617	12.3277	12.5339	11.7219	NM_212552	chr2:074362689-074362630	BOLA3	Homo sapiens bolA homolog 3 (E. coli) (BOLA3), transcript variant 1, mRNA [NM_212552]	GO:0008150|GO:0003674|GO:0005575	NM_212552	Hs.61472	388962	ENST00000295326
A_23_P401904	0.0196232	1.64347	down	6001.4	8963.39	12.1716	12.8883	17041.5	8042.01	1799.58	5350.06	8049.09	4612.14	13.4688	12.7093	12.7868	12.2641	12.4093	11.5414	NM_001009936	chr9:123632058-123631999	PHF19	Homo sapiens PHD finger protein 19 (PHF19), transcript variant 2, mRNA [NM_001009936]	GO:0005515|GO:0008270|GO:0005634|GO:0003676|GO:0046872|GO:0045449	NM_001009936	Hs.460124	26147	ENST00000312189
A_33_P3424591	0.0128657	2.31587	down	5437.02	8295.27	11.9314	13.1429	11928.6	3754.51	5977.43	8748.19	6979.74	3808.36	12.927	11.4734	14.2984	13.0903	12.2033	11.2304	XM_002348257	chr14:106207869-106207810		Ig gamma-1 chain C region [Source:UniProtKB/Swiss-Prot;Acc:P01857] [ENST00000390549]		XM_002348257	Hs.510635		ENST00000390549	NP232832
A_24_P130041	0.0333097	1.81664	down	1721.59	2908.92	10.1484	11.0096	3889.71	1505.96	298.392	1011.45	4538.67	2647.37	11.2412	10.1175	10.2645	9.69675	11.5232	10.6308	NM_000786	chr7:091741740-091741682	CYP51A1	Homo sapiens cytochrome P450, family 51, subfamily A, polypeptide 1 (CYP51A1), transcript variant 1, mRNA [NM_000786]	GO:0006695|GO:0005792|GO:0004497|GO:0016020|GO:0005783|GO:0005789|GO:0009055|GO:0016021|GO:0008398|GO:0046872|GO:0055114|GO:0020037	NM_000786	Hs.417077	1595	ENST00000422722
A_24_P314571	0.014217	1.83984	down	78.7913	149.648	5.89088	6.77046	260.611	104.077	24.8472	34.0598	163.485	98.237	7.66108	6.59902	5.80415	4.92231	6.84615	6.15131	BU616832	chr19:11257053-11256994		Kinetochore protein Spc24 (hSpc24) [Source:UniProtKB/Swiss-Prot;Acc:Q8NBT2] [ENST00000293743]			Hs.621849		ENST00000293743
A_23_P338603	0.0042619	1.54155	down	648.805	768.144	8.84942	9.4738	920.532	537.374	210.142	623.971	1173.76	785.069	9.23583	8.6929	9.69844	9.03961	9.48714	8.81573	NM_001011667		CHCHD7	Homo sapiens coiled-coil-helix-coiled-coil-helix domain containing 7 (CHCHD7), transcript variant 1, mRNA [NM_001011667]		NM_001011667	Hs.436913	79145
A_32_P59302	0.042159	2.06553	down	1080.79	1645.84	9.51241	10.5589	3175.78	1516	526.781	976.549	1234.96	749.818	10.9667	10.1285	11.1432	9.65309	9.56684	8.75568	BC080552	chr1:41972662-41972603	HIVEP3	Transcription factor HIVEP3 (Human immunodeficiency virus type I enhancer-binding protein 3)(Kappa-B and V(D)J recombination signal sequences-binding protein)(Zinc finger protein ZAS3)(Kappa-binding protein 1)(KBP-1) [Source:UniProtKB/Swiss-Prot;Acc:Q5T1R4] [ENST00000372583]	GO:0005622|GO:0005737|GO:0045941|GO:0016563|GO:0008270|GO:0005634|GO:0003677|GO:0046872		Hs.403972	59269	ENST00000372583
A_24_P230282	0.00271537	1.51121	down	61.1656	87.9163	5.53552	6.13122	194.117	106.31	29.4395	50.3647	40.1925	26.8219	7.28284	6.62496	6.09463	5.52839	5.01621	4.45323	NM_016378		VCX2	Homo sapiens variable charge, X-linked 2 (VCX2), mRNA [NM_016378]	GO:0008150|GO:0003674|GO:0005575	NM_016378	Hs.279737	51480	ENST00000427508	NP1466053
A_23_P90732	0.0218037	1.53204	down	7498.38	9145.74	12.5865	13.202	14052.5	6952.59	3994.82	8694.11	9389.91	6848.43	13.1934	12.4849	13.7848	13.0776	12.6277	12.197	NM_001077399	chr2:219137494-219137553	PNKD	Homo sapiens paroxysmal nonkinesigenic dyskinesia (PNKD), transcript variant 3, mRNA [NM_001077399]	GO:0005739|GO:0005737|GO:0016787|GO:0016020|GO:0008270|GO:0005634|GO:0004416|GO:0046872|GO:0019898	NM_001077399	Hs.98475	25953	ENST00000248451	NP1211659
A_23_P8582	0.0336779	1.52858	down	599.793	911.331	8.6411	9.25329	1429.04	749.549	100.9	288.944	1204.05	760.887	9.83536	9.13707	8.39536	8.01144	9.52916	8.77479	NM_032581	chr7:022985197-022985138	FAM126A	Homo sapiens family with sequence similarity 126, member A (FAM126A), mRNA [NM_032581]	GO:0008150|GO:0005737|GO:0016020|GO:0005575|GO:0004871	NM_032581	Hs.85603	84668	ENST00000457703
A_23_P8055	0.0284952	1.54872	down	2091.5	3088.79	10.424	11.055	4050.79	2033.22	290.796	1090.8	4924.78	3150.47	11.3001	10.5549	10.2182	9.80475	11.6469	10.9122	NM_007243	chr6:030656220-030656161	NRM	Homo sapiens nurim (nuclear envelope membrane protein) (NRM), mRNA [NM_007243]	GO:0008150|GO:0003674|GO:0016020|GO:0005634|GO:0016021|GO:0005635	NM_007243	Hs.519993	11270	ENST00000376421
A_33_P3261743	0.0141431	1.76197	down	106.784	152.698	6.25702	7.07421	106.266	52.692	50.137	74.1938	301.69	193.466	6.51225	5.69049	7.07364	6.08864	7.63674	6.99193	NM_001145290	chr11:124955854-124955913	SLC37A2	Homo sapiens solute carrier family 37 (glycerol-3-phosphate transporter), member 2 (SLC37A2), transcript variant 2, mRNA [NM_001145290]	GO:0016020|GO:0008643|GO:0016021|GO:0055085	NM_001145290	Hs.352661	219855	ENST00000407458	NP868942
A_23_P119562	0.0496326	2.44475	down	1400.26	2886.51	9.89543	11.1851	2033.08	969.775	562.305	1295.48	6064.15	1935.52	10.3285	9.48566	11.2365	10.0664	11.9904	10.1343	NM_001928	chr19:000863247-000863306	CFD	Homo sapiens complement factor D (adipsin) (CFD), mRNA [NM_001928]	GO:0006957|GO:0007219|GO:0004252|GO:0006508|GO:0031093|GO:0008233|GO:0005576|GO:0005615	NM_001928	Hs.155597	1675	ENST00000327726
A_23_P20777	0.00795462	1.6082	down	2067.34	2483.32	10.5282	11.2137	3634.73	1990.97	699.458	2027.29	3115.77	2183.76	11.1482	10.5208	11.545	10.7366	10.9479	10.3274	NM_033117	chr9:125004149-125004090	RBM18	Homo sapiens RNA binding motif protein 18 (RBM18), transcript variant 1, mRNA [NM_033117]	GO:0000166|GO:0003723	NM_033117	Hs.415842	92400	ENST00000373748
A_33_P3209962	0.0478685	1.52678	down	3204.51	3195.64	11.0206	11.6311	5718.91	2874.12	1519	5223.54	2349.01	1515.85	11.8159	11.0808	12.5651	12.2314	10.5121	9.74952	NM_153819	chr11:064508971-064508912	RASGRP2	Homo sapiens RAS guanyl releasing protein 2 (calcium and DAG-regulated) (RASGRP2), transcript variant 2, mRNA [NM_153819]	GO:0051056|GO:0030054|GO:0005886|GO:0005509|GO:0045202|GO:0007265|GO:0042995|GO:0001558|GO:0005829|GO:0019992|GO:0005085|GO:0005622|GO:0005737|GO:0008270|GO:0019717|GO:0019898	NM_153819	Hs.99491	10235	ENST00000377489
A_23_P150379	0.0327192	2.22212	down	111.196	203.964	6.52823	7.68017	268.582	125.773	75.8732	84.8895	267.438	122.925	7.70171	6.85417	7.86123	6.29739	7.47757	6.43314	NM_144765	chr11:118127915-118127856	MPZL2	Homo sapiens myelin protein zero-like 2 (MPZL2), transcript variant 2, mRNA [NM_144765]	GO:0005515|GO:0016020|GO:0016021|GO:0007155|GO:0005856|GO:0009653|GO:0007156	NM_144765	Hs.116651	10205	ENST00000438295
A_23_P213102	0.0493087	1.58775	down	2217.19	4086.22	9.60803	10.275	1587.97	937.837	81.7167	202.919	10589	5510.82	9.99293	9.44346	8.00673	7.52728	12.8254	11.8534	NM_016081	chr4:169848826-169848885	PALLD	Homo sapiens palladin, cytoskeletal associated protein (PALLD), transcript variant 2, mRNA [NM_016081]	GO:0005515|GO:0051371|GO:0005737|GO:0005884|GO:0007010|GO:0005634|GO:0003779|GO:0005856	NM_016081	Hs.151220	23022	ENST00000261509
A_23_P133694	0.0201365	2.10779	down	2045.03	4269.44	10.0869	11.1626	5229.43	1709.47	190.939	473.509	7387.96	3952.1	11.6749	10.2978	9.53175	8.66951	12.2811	11.2933	NM_001078177	chr6:044201775-044201834	SLC29A1	Homo sapiens solute carrier family 29 (nucleoside transporters), member 1 (SLC29A1), nuclear gene encoding mitochondrial protein, transcript variant 1, mRNA [NM_001078177]	GO:0005515|GO:0006139|GO:0005886|GO:0005887|GO:0005337|GO:0006810|GO:0015858|GO:0005624	NM_001078177	Hs.25450	2030	ENST00000371724
A_24_P209047	0.0262366	2.85448	down	534.571	2320.11	6.70638	8.2196	6799.37	1518.11	27.5545	26.2771	133.414	59.3217	12.093	10.1307	5.98256	4.50313	6.58329	5.48529	NM_000879	chr5:131877599-131877540	IL5	Homo sapiens interleukin 5 (colony-stimulating factor, eosinophil) (IL5), mRNA [NM_000879]	GO:0005137|GO:0008284|GO:0030890|GO:0019221|GO:0050731|GO:0005576|GO:0005625|GO:0005125|GO:0005615|GO:0046427|GO:0043193|GO:0051091|GO:0006955|GO:0006954|GO:0045645|GO:0008083	NM_000879	Hs.2247	3567	ENST00000231454
A_32_P105549	0.00684878	1.90146	down	581.566	1163.48	7.65576	8.58286	3168.45	1523.76	56.9952	81.775	264.993	139.168	10.9635	10.1366	7.31994	6.24119	7.46513	6.58943	NM_001630	chr10:047158065-047158006	ANXA8L2	Homo sapiens annexin A8-like 2 (ANXA8L2), mRNA [NM_001630]	GO:0005544|GO:0005509	NM_001630	Hs.705389	244	ENST00000344416
A_24_P331655	0.031403	1.81632	down	598.172	843.167	8.69696	9.55798	1478.95	861.916	220.091	512.629	830.463	419.97	9.88268	9.33399	9.77699	8.77038	9.01426	7.98649	NM_001040715	chr16:067209673-067209614	KIAA0895L	Homo sapiens KIAA0895-like (KIAA0895L), mRNA [NM_001040715]		NM_001040715	Hs.651201	653319	ENST00000290881
A_24_P318967	0.0186845	1.59714	down	4535.72	7116.93	11.6255	12.301	8205.2	4362.51	655.249	2292.18	12490.3	6952.48	12.3788	11.7381	11.4533	10.9198	13.0708	12.2185	NM_003681		PDXK	Homo sapiens pyridoxal (pyridoxine, vitamin B6) kinase (PDXK), mRNA [NM_003681]	GO:0042823|GO:0000287|GO:0008283|GO:0042816|GO:0008478|GO:0030955|GO:0031402|GO:0031403|GO:0005524|GO:0042803|GO:0005829|GO:0005737|GO:0000166|GO:0030170|GO:0008270|GO:0008615|GO:0016740	NM_003681	Hs.284491	8566	ENST00000291565	NP1199201
A_23_P58407	0.0123161	2.33094	down	190.679	296.31	7.22032	8.44123	368.223	139.629	181.938	277.857	338.769	154.55	8.07975	6.98951	9.4476	7.95325	7.79635	6.71819	NM_001076	chr4:069512817-069512758	UGT2B15	Homo sapiens UDP glucuronosyltransferase 2 family, polypeptide B15 (UGT2B15), mRNA [NM_001076]	GO:0005792|GO:0006805|GO:0016020|GO:0005783|GO:0008152|GO:0015020|GO:0016021|GO:0008202	NM_001076	Hs.150207	7366	ENST00000338206	NP095455
A_24_P192994	0.0307006	2.34307	down	1220.98	2203.15	9.06138	10.2898	1780.51	607.818	154.751	213.429	4674.18	2841.7	10.1348	8.84045	9.16446	7.59166	11.5701	10.752	NM_013402	chr11:061567185-061567126	FADS1	Homo sapiens fatty acid desaturase 1 (FADS1), mRNA [NM_013402]	GO:0046456|GO:0005515|GO:0019369|GO:0014070|GO:0005783|GO:0033189|GO:0007267|GO:0005634|GO:0009744|GO:0006810|GO:0045449|GO:0009267|GO:0005792|GO:0032868|GO:0000248|GO:0007584|GO:0007568|GO:0006950|GO:0005624|GO:0008654|GO:0016020|GO:0016491|GO:0045595|GO:0016021|GO:0022900|GO:0020037	NM_013402	Hs.503546	3992	ENST00000350997
A_24_P647682	0.0453529	1.58416	down	341.576	494.328	7.79052	8.45425	691.198	302.339	68.2947	136.07	723.492	586.32	8.87835	7.9782	7.66267	6.96766	8.82171	8.42571	NR_003598	chr7:055714250-055714309	LOC442308	Homo sapiens similar to tubulin, beta 5 (LOC442308), non-coding RNA [NR_003598]		NR_003598		442308
A_23_P144877	0.0183011	1.55506	down	8578.77	10718.7	12.6744	13.3114	10048.5	5091.75	3399.78	7534.13	18708	13110.4	12.6809	11.9808	13.5674	12.8209	13.6859	13.2216	NM_004045	chr5:151125929-151125870	ATOX1	Homo sapiens ATX1 antioxidant protein 1 homolog (yeast) (ATOX1), mRNA [NM_004045]	GO:0032767|GO:0006878|GO:0016531|GO:0006979|GO:0046872|GO:0030001|GO:0006825|GO:0006811|GO:0005829	NM_004045	Hs.125213	475	ENST00000313115
A_23_P430658	0.00948523	1.5059	down	41.0177	59.555	5.00021	5.59084	47.0248	26.2736	16.1877	27.5484	115.452	69.2312	5.30539	4.72181	5.07507	4.58109	6.39205	5.69775	NM_014571	chr1:040089900-040089841	HEYL	Homo sapiens hairy/enhancer-of-split related with YRPW motif-like (HEYL), mRNA [NM_014571]	GO:0005515|GO:0006355|GO:0003700|GO:0007219|GO:0007275|GO:0005634|GO:0007399	NM_014571	Hs.472566	26508	ENST00000372852
A_23_P254507	0.0486231	1.72515	down	15947.9	26380.8	13.703	14.4898	38707.4	14619.4	5243.1	9944.82	35192	23279.6	14.7305	13.6699	14.1449	13.2925	14.5939	14.1467	NM_139211	chr4:057514502-057514443	HOPX	Homo sapiens HOP homeobox (HOPX), transcript variant 2, mRNA [NM_139211]	GO:0043565|GO:0006355|GO:0003700|GO:0007275|GO:0005634|GO:0045596|GO:0001829	NM_139211	Hs.619396	84525	ENST00000317745
A_23_P50426	0.033023	1.89634	down	254.478	381.441	7.63144	8.55466	412.458	230.837	132.517	238.659	599.349	293.939	8.21596	7.63114	8.88627	7.73971	8.56176	7.52349	NM_015493	chr19:011275104-011275045	KANK2	Homo sapiens KN motif and ankyrin repeat domains 2 (KANK2), transcript variant 1, mRNA [NM_015493]		NM_015493	Hs.284208	25959	ENST00000355150
A_24_P109214	0.0182566	3.86451	down	174.994	513.677	6.69251	8.6428	159.213	31.9137	173.678	269.128	1208.14	223.939	7.03195	5.00032	9.36134	7.90912	9.5351	7.1681	NM_001645	chr19:045422436-045422495	APOC1	Homo sapiens apolipoprotein C-I (APOC1), mRNA [NM_001645]	GO:0032375|GO:0005783|GO:0010900|GO:0010873|GO:0042627|GO:0034379|GO:0060228|GO:0034361|GO:0034364|GO:0034382|GO:0008203|GO:0033344|GO:0005504|GO:0004859|GO:0045717|GO:0031210|GO:0005576|GO:0010916|GO:0051005|GO:0033700|GO:0048261|GO:0006869|GO:0034375|GO:0042157|GO:0006641	NM_001645	Hs.110675	341	ENST00000252491	NP091897
A_33_P3278451	0.0291722	1.61789	down	72.7685	93.556	5.986	6.68012	138.402	72.5589	50.1641	79.227	92.1018	66.5196	6.85608	6.1244	7.07545	6.19269	6.10882	5.64091	DA717721	chr19:28785183-28785124		DA717721 NT2RI2 Homo sapiens cDNA clone NT2RI2025693 5', mRNA sequence [DA717721]			Hs.209140
A_23_P3994	0.0499419	1.90995	down	12067.3	18118.2	13.3293	14.2629	24336.1	11058	11382.4	13245	18636.2	11898.8	14.0462	13.1999	15.0612	13.7162	13.6811	13.0719	NM_152766	chr17:007306503-007306444	C17orf61	Homo sapiens chromosome 17 open reading frame 61 (C17orf61), mRNA [NM_152766]	GO:0016020|GO:0005743|GO:0016021	NM_152766	Hs.534591	254863	ENST00000302422
A_23_P321984	0.0285247	2.00652	down	645.741	956.918	8.76175	9.76644	1921.51	933.287	338.596	656.31	610.646	347.627	10.2441	9.43699	10.4655	9.11518	8.58968	7.73308	NM_172004	chr12:009875386-009875327	CLECL1	Homo sapiens C-type lectin-like 1 (CLECL1), mRNA [NM_172004]	GO:0005886|GO:0005488|GO:0005529|GO:0016021	NM_172004	Hs.560087	160365	ENST00000327839
A_33_P3240200	0.00926836	3.7175	down	375.546	1217.76	8.00307	9.8974	1702.97	451.659	190.993	172.31	1759.3	502.669	10.0847	8.48249	9.53279	7.2996	10.0748	8.22713	NM_015448	chr10:103369350-103369409	RP11-529I10.4	Homo sapiens deleted in a mouse model of primary ciliary dyskinesia (RP11-529I10.4), mRNA [NM_015448]	GO:0005515	NM_015448	Hs.658128	25911	ENST00000370149
A_23_P385861	0.0482703	2.38677	down	834.359	1723.79	8.68978	9.94484	2650.91	723.571	111.065	152.811	2409.41	1626.7	10.7238	9.08622	8.56048	7.12785	10.5503	9.85527	NM_152562	chr8:025365256-025365315	CDCA2	Homo sapiens cell division cycle associated 2 (CDCA2), mRNA [NM_152562]	GO:0007067|GO:0007049|GO:0005634|GO:0051301	NM_152562	Hs.33366	157313	ENST00000435898	NP1459367
A_33_P3324004	0.046191	1.93967	down	217.223	341.719	7.42632	8.38213	572.834	228.246	123.101	193.674	329.222	229.748	8.63836	7.61761	8.74701	7.45929	7.76101	7.20206	NM_032965	chr17:034324822-034324763	CCL15	Homo sapiens chemokine (C-C motif) ligand 15 (CCL15), mRNA [NM_032965]	GO:0008009|GO:0007165|GO:0006955|GO:0006935|GO:0007267|GO:0006874|GO:0005576|GO:0004871|GO:0042056|GO:0008201|GO:0005615	NM_032965	Hs.272493	6359	ENST00000354059
A_33_P3265359	0.0327252	1.64683	down	1087.45	1556.61	9.31907	10.0388	2225.96	1271.08	156.091	330.36	2287.77	1660.92	10.4634	9.87493	9.17977	8.19311	10.4731	9.88915	NM_018645	chr2:239147006-239146947	HES6	Homo sapiens hairy and enhancer of split 6 (Drosophila) (HES6), transcript variant 1, mRNA [NM_018645]	GO:0003712|GO:0005667|GO:0003700|GO:0006357|GO:0007275|GO:0005634|GO:0030154|GO:0007399	NM_018645	Hs.42949	55502	ENST00000409002
A_33_P3391496	0.0480651	1.55785	down	172.257	186.127	7.12079	7.76035	226.576	142.673	111.036	220.597	220.769	153.502	7.48818	7.02174	8.56016	7.63144	7.23272	6.7092		chr5:168093778-168093719		Slit homolog 3 protein Precursor (Slit-3)(Multiple epidermal growth factor-like domains 5) [Source:UniProtKB/Swiss-Prot;Acc:O75094] [ENST00000404867]					ENST00000404867
A_24_P188071	0.0481163	2.31561	down	8581.34	17171.8	12.6281	13.8395	26944.4	8749.41	3190.43	4239.67	21380.6	12754.9	14.1766	12.8262	13.4798	11.8757	13.8621	13.1825	NM_032704	chr12:049667030-049667089	TUBA1C	Homo sapiens tubulin, alpha 1c (TUBA1C), mRNA [NM_032704]	GO:0005515|GO:0051258|GO:0000166|GO:0005198|GO:0005874|GO:0003924|GO:0005525|GO:0007018	NM_032704	Hs.719091	84790	ENST00000301072
A_23_P26994	0.040388	1.98198	down	638.547	1061.03	8.70321	9.69015	2294.81	1083.05	232.558	415.254	655.735	417.336	10.5075	9.64626	9.87217	8.48516	8.69074	7.9782	NM_031498	chr17:047284034-047283975	GNGT2	Homo sapiens guanine nucleotide binding protein (G protein), gamma transducing activity polypeptide 2 (GNGT2), mRNA [NM_031498]	GO:0007165|GO:0007186|GO:0005886|GO:0005834|GO:0003924|GO:0005576|GO:0004871|GO:0007602	NM_031498	Hs.181781	2793	ENST00000300406
A_23_P307382	0.0417858	1.7335	down	76.2649	98.114	6.04007	6.83376	93.7827	58.492	64.3197	94.2625	136.24	76.0403	6.34511	5.8362	7.54273	6.45373	6.61344	5.83028	NM_080552	chr20:037357828-037357887	SLC32A1	Homo sapiens solute carrier family 32 (GABA vesicular transporter), member 1 (SLC32A1), mRNA [NM_080552]	GO:0015816|GO:0016020|GO:0006836|GO:0015495|GO:0015187|GO:0005276|GO:0060077|GO:0030672|GO:0031410|GO:0016021	NM_080552	Hs.179080	140679	ENST00000217420
A_33_P3282390	0.0465253	2.75477	down	40.843	84.7535	5.16603	6.62797	126.641	34.2699	62.5276	51.7099	65.0918	36.5492	6.73629	5.09485	7.48478	5.56824	5.66283	4.83502	NM_000841	chr6:033989744-033989685	GRM4	Homo sapiens glutamate receptor, metabotropic 4 (GRM4), mRNA [NM_000841]	GO:0005886|GO:0004930|GO:0007268|GO:0007196|GO:0031410|GO:0007194|GO:0007269|GO:0005622|GO:0000187|GO:0007165|GO:0007186|GO:0005887|GO:0008066|GO:0004872|GO:0007612|GO:0043526|GO:0043410	NM_000841	Hs.654847	2914	ENST00000374177
A_24_P402415	0.0241302	1.62069	down	33.7533	46.3096	4.88584	5.58245	55.2041	33.7642	22.0311	30.0055	61.6935	37.4901	5.56895	5.07507	5.58713	4.7142	5.59126	4.86824	NM_153262	chr1:210335095-210335154	SYT14	Homo sapiens synaptotagmin XIV (SYT14), transcript variant 4, mRNA [NM_153262]	GO:0016020|GO:0016021	NM_153262	Hs.658866	255928	ENST00000367019	NP920567
A_24_P246518	0.0409343	1.79129	down	34.4807	51.5896	4.8593	5.7003	40.1114	22.1701	28.4083	33.0339	86.2492	48.2381	5.04521	4.49248	6.03081	4.87197	6.02489	5.21345	NM_052892	chr16:081164168-081164109	PKD1L2	Homo sapiens polycystic kidney disease 1-like 2 (PKD1L2), transcript variant 1, mRNA [NM_052892]	GO:0016020|GO:0007218|GO:0005488|GO:0005509|GO:0005529|GO:0016021|GO:0005216|GO:0006811	NM_052892	Hs.413525	114780	ENST00000388855	NP852902
A_33_P3244931	0.0122363	1.58251	down	33970	53717.8	14.9434	15.6056	81392.7	34444	18090.6	31142.8	61670	36323.2	15.8248	15.0165	15.6105	15.0011	15.3816	14.8125	NM_020548	chr2:120129987-120130046	DBI	Homo sapiens diazepam binding inhibitor (GABA receptor modulator, acyl-Coenzyme A binding protein) (DBI), transcript variant 1, mRNA [NM_020548]	GO:0006810|GO:0030156|GO:0000062|GO:0008289	NM_020548	Hs.78888	1622	ENST00000409094
A_24_P233570	0.0432354	1.52407	down	31824.2	44014.6	14.8408	15.4487	65100.1	33276.1	24075.5	32648.7	42868.1	29547.8	15.4871	14.9436	15.9401	15.0806	14.9188	14.4981	NM_002793	chr6:170844312-170844253	PSMB1	Homo sapiens proteasome (prosome, macropain) subunit, beta type, 1 (PSMB1), mRNA [NM_002793]	GO:0005515|GO:0005839|GO:0005737|GO:0051603|GO:0051437|GO:0008233|GO:0005634|GO:0051436|GO:0031145|GO:0004298	NM_002793	Hs.352768	5689	ENST00000262193
A_24_P192805	0.0489495	1.63215	down	1049.93	1039.03	9.38777	10.0945	1752.25	1154.56	524.697	1523.94	840.138	471.304	10.1179	9.73419	11.1354	10.296	9.03032	8.13307	NM_001007232		CARD17	Homo sapiens caspase recruitment domain family, member 17 (CARD17), mRNA [NM_001007232]	GO:0005622|GO:0005515|GO:0004197|GO:0005737|GO:0004869|GO:0006508|GO:0042981|GO:0030414	NM_001007232	Hs.44102	440068	ENST00000393135
A_23_P74115	0.00752193	2.08438	down	727.86	1487.37	8.706	9.76562	2939.21	1165.67	118.684	198.926	1404.21	818.987	10.8668	9.74632	8.68059	7.50021	9.74952	8.87147	NM_003579	chr1:046744038-046744097	RAD54L	Homo sapiens RAD54-like (S. cerevisiae) (RAD54L), transcript variant 1, mRNA [NM_003579]	GO:0051276|GO:0042493|GO:0004386|GO:0005634|GO:0006310|GO:0003677|GO:0005524|GO:0006974|GO:0007126|GO:0000166|GO:0016787|GO:0000724|GO:0010212	NM_003579	Hs.642042	8438	ENST00000371975
A_23_P134295	0.00206151	2.09649	down	4056.69	6855.88	11.5616	12.6296	12561.6	4704.4	1942.56	4213.83	6063.49	3251.84	13.0187	11.8539	12.8804	11.8672	11.9897	10.9638	NM_198949	chr7:002290560-002290619	NUDT1	Homo sapiens nudix (nucleoside diphosphate linked moiety X)-type motif 1 (NUDT1), transcript variant 2B, mRNA [NM_198949]	GO:0005515|GO:0005737|GO:0006281|GO:0006203|GO:0016787|GO:0003924|GO:0008413|GO:0006979	NM_198949	Hs.534331	4521	ENST00000397049
A_24_P186986	0.00803684	1.86991	down	1982.55	2724.9	10.4638	11.3667	3969.15	1922.36	829.688	1978.3	3375.86	2046.98	11.2733	10.4711	11.7596	10.6954	11.0673	10.2248	XM_001718253	chr13:107315845-107315904	LOC390424	PREDICTED: Homo sapiens similar to hCG1639781 (LOC390424), mRNA [XM_001718253]		XM_001718253		390424
A_24_P822692	0.0286669	1.59564	down	66.9818	80.2587	5.85958	6.53371	106.774	67.9181	50.9708	80.8616	83.0309	52.1658	6.51858	6.03762	7.10698	6.22293	5.97557	5.31817	XM_933621	chr19:039399780-039399721	LOC643669	PREDICTED: Homo sapiens similar to mCG2980, transcript variant 1 (LOC643669), mRNA [XM_933621]		XM_933621	Hs.355357	643669
A_23_P116264	0.0165325	1.77548	down	161.549	290.124	6.89188	7.72009	342.774	167.602	45.752	80.3316	481.847	236.712	7.9891	7.22265	6.89267	6.21254	8.27848	7.24044	NM_006176	chr11:124616792-124616851	NRGN	Homo sapiens neurogranin (protein kinase C substrate, RC3) (NRGN), transcript variant 1, mRNA [NM_006176]	GO:0007165|GO:0005516|GO:0007399	NM_006176	Hs.524116	4900	ENST00000412681
A_23_P200252	0.0167407	1.50342	down	1604.84	1757	10.1372	10.7254	2333.89	1425.36	504.289	1802.7	2432.81	1586.47	10.5319	10.0413	11.0825	10.5487	10.5619	9.82151	NM_032324	chr1:233105679-233105738	C1orf57	Homo sapiens chromosome 1 open reading frame 57 (C1orf57), mRNA [NM_032324]	GO:0017111|GO:0016787|GO:0000166|GO:0005524|GO:0016740	NM_032324	Hs.642715	84284	ENST00000366628
A_23_P303891	0.0105698	1.60896	down	4011.1	4743.49	11.5484	12.2346	6704.29	3306.09	1676.74	4967.55	5849.46	3759.66	12.0757	11.2847	12.6999	12.1494	11.9281	11.2112	NM_178351	chr1:152777894-152777835	LCE1C	Homo sapiens late cornified envelope 1C (LCE1C), mRNA [NM_178351]	GO:0031424	NM_178351	Hs.516429	353133	ENST00000368768	NP1250118
A_23_P142631	0.0263217	1.54317	down	250.082	340.987	7.55785	8.18374	559.151	292.155	80.9633	161.978	382.847	296.113	8.60583	7.9316	7.98717	7.21094	7.95824	7.531	NM_054033	chr2:024286286-024286345	FKBP1B	Homo sapiens FK506 binding protein 1B, 12.6 kDa (FKBP1B), transcript variant 2, mRNA [NM_054033]	GO:0010459|GO:0003755|GO:0005102|GO:0033017|GO:0005528|GO:0010881|GO:0014808|GO:0034704|GO:0019227|GO:0022417|GO:0005829|GO:0009749|GO:0006939|GO:0042026|GO:0005737|GO:0042098|GO:0006458|GO:0032234|GO:0060314|GO:0032513|GO:0051775|GO:0016853|GO:0030073|GO:0005219	NM_054033	Hs.709461	2281	ENST00000452109	NP090150
A_33_P3421695	0.0126311	1.56542	down	53.355	67.7067	5.54388	6.19043	83.6078	43.1344	34.6331	63.9214	84.8793	53.0091	6.18224	5.41698	6.3866	5.87408	6.00246	5.34059	NM_001098210	chr3:041280687-041280746	CTNNB1	Homo sapiens catenin (cadherin-associated protein), beta 1, 88kDa (CTNNB1), transcript variant 3, mRNA [NM_001098210]	GO:0014070|GO:0043627|GO:0030018|GO:0003700|GO:0030877|GO:0045202|GO:0031528|GO:0016342|GO:0001711|GO:0007507|GO:0010909|GO:0016337|GO:0034747|GO:0000578|GO:0003690|GO:0042127|GO:0005856|GO:0005938|GO:0033077|GO:0005813|GO:0045296|GO:0001708|GO:0045294|GO:0019903|GO:0003713|GO:0010843|GO:0010552|GO:0000122|GO:0030027|GO:0001702|GO:0001889|GO:0030997|GO:0001501|GO:0042733|GO:0008134|GO:0043005|GO:…	NM_001098210	Hs.476018	1499	ENST00000405570
A_24_P218979	0.0295559	2.44624	down	832.945	2090.42	8.91316	10.2037	3746.36	942.454	132.378	241.301	2392.52	1315.08	11.1904	9.45145	8.88198	7.75457	10.5388	9.53346	NM_031299		CDCA3	Homo sapiens cell division cycle associated 3 (CDCA3), mRNA [NM_031299]	GO:0008150|GO:0003674|GO:0007067|GO:0007049|GO:0005737|GO:0019941|GO:0005575|GO:0051301|GO:0005829	NM_031299	Hs.524216	83461	ENST00000229265
A_24_P358321	0.0131725	1.6267	down	382.358	463.768	8.16488	8.86683	705.384	373.104	170.113	410.937	515.807	363.033	8.90176	8.23405	9.32575	8.4689	8.37298	7.7917	BQ711007	chr2:89986891-89986950		Kappa light chain variable region Fragment [Source:UniProtKB/TrEMBL;Acc:A2NJV5] [ENST00000491977]			Hs.449609		ENST00000491977	NP1132773
A_23_P105592	0.0313124	1.91333	down	821.16	1266.34	9.17365	10.1097	2448.46	975.675	332.36	773.757	1018.19	714.048	10.5997	9.49462	10.4372	9.33079	9.29232	8.69554	NM_000431	chr12:110034941-110035000	MVK	Homo sapiens mevalonate kinase (MVK), transcript variant 1, mRNA [NM_000431]	GO:0016310|GO:0006695|GO:0005737|GO:0000166|GO:0004496|GO:0008152|GO:0008299|GO:0005524|GO:0016740|GO:0042802|GO:0005777	NM_000431	Hs.130607	4598	ENST00000228510
A_33_P3275422	0.00655483	1.53796	down	400.121	492.38	8.21665	8.83768	636.141	331.168	138.159	400.399	702.839	468.796	8.76999	8.08777	8.95684	8.43606	8.7862	8.12612	NR_024096	chr14:101138994-101139053	C14orf70	Homo sapiens chromosome 14 open reading frame 70 (C14orf70), non-coding RNA [NR_024096]		NR_024096	Hs.379802	283601	ENST00000360899
A_33_P3297978	0.00188582	1.91852	down	3477.34	6467.39	11.0331	11.9731	7098.33	3323.9	413.969	1098.62	11889.9	6009.51	12.1522	11.2884	10.7675	9.81494	12.9996	11.9959	NM_004998	chr15:059428708-059428649	MYO1E	Homo sapiens myosin IE (MYO1E), mRNA [NM_004998]	GO:0030048|GO:0005516|GO:0006807|GO:0042623|GO:0001822|GO:0003779|GO:0016459|GO:0001701|GO:0005524|GO:0000146|GO:0000166|GO:0035166|GO:0048008|GO:0001570	NM_004998	Hs.654506	4643	ENST00000288235
A_33_P3223592	0.00128961	1.71007	down	3371.5	5278.19	10.3204	11.0945	1302.74	632.39	305.66	880.784	14226.2	8601.33	9.7154	8.90474	10.3059	9.51383	13.2622	12.5427	NM_000041	chr19:045412590-045412649	APOE	Homo sapiens apolipoprotein E (APOE), mRNA [NM_000041]	GO:0010468|GO:0006707|GO:0046911|GO:0048844|GO:0002021|GO:0005615|GO:0042803|GO:0034361|GO:0048168|GO:0034364|GO:0034363|GO:0034362|GO:0043025|GO:0034447|GO:0042632|GO:0005794|GO:0016209|GO:0046982|GO:0043691|GO:0031232|GO:0007271|GO:0006898|GO:0051651|GO:0034372|GO:0007186|GO:0051000|GO:0034375|GO:0006641|GO:0000302|GO:0043537|GO:0042159|GO:0005319|GO:0042158|GO:0006629|GO:0010544|GO:0051044|GO:…	NM_000041	Hs.654439	348	ENST00000252486
A_33_P3253144	0.043175	1.90649	down	375.758	513.885	7.60506	8.53599	188.911	91.1703	126.757	197.055	1225.99	839.049	7.24976	6.42472	8.80425	7.4864	9.55394	8.90408	NM_024872	chr5:176930812-176930753	DOK3	Homo sapiens docking protein 3 (DOK3), transcript variant 1, mRNA [NM_024872]	GO:0005515|GO:0005737|GO:0005886|GO:0005158|GO:0007265	NM_024872	Hs.720849	79930	ENST00000357198
A_23_P397238	0.0436777	1.61629	down	766.008	1052.01	9.04139	9.73408	2181.41	1089.04	239.935	615.342	734.682	593.646	10.4341	9.65739	9.92081	9.02126	8.8473	8.44553	NM_054014	chr20:001352589-001352530	FKBP1A	Homo sapiens FK506 binding protein 1A, 12kDa (FKBP1A), transcript variant 12A, mRNA [NM_054014]	GO:0055010|GO:0046332|GO:0022417|GO:0005829|GO:0032092|GO:0042026|GO:0005737|GO:0006458|GO:0048185|GO:0060314|GO:0031398|GO:0005024|GO:0004871|GO:0043206|GO:0043123|GO:0014802|GO:0003755|GO:0005528|GO:0032925|GO:0034205|GO:0060347|GO:0007183|GO:0042110|GO:0034713|GO:0032513|GO:0050776|GO:0016853|GO:0005219	NM_054014	Hs.471933	2280	ENST00000381715
A_24_P274795	0.0113509	2.00035	down	2055.94	3350.89	10.4646	11.4648	3276.61	1476.54	618.959	1749.45	6157.11	2941.82	11.0105	10.0902	11.3663	10.4989	12.0177	10.8046	NM_018719	chr7:021940891-021940832	CDCA7L	Homo sapiens cell division cycle associated 7-like (CDCA7L), transcript variant 1, mRNA [NM_018719]	GO:0005737|GO:0005634|GO:0045449	NM_018719	Hs.520245	55536	ENST00000405437
A_23_P161769	0.0478762	3.18009	down	824.267	2392.23	8.85536	10.5244	634.153	273.121	421.593	529.475	6120.94	1670.2	8.76623	7.85183	10.8002	8.81426	12.0069	9.9	NM_021603	chr11:117691003-117690944	FXYD2	Homo sapiens FXYD domain containing ion transport regulator 2 (FXYD2), transcript variant b, mRNA [NM_021603]	GO:0005215|GO:0016020|GO:0030955|GO:0016021|GO:0031402|GO:0006814|GO:0005890|GO:0006813|GO:0005216|GO:0006811|GO:0005391	NM_021603	Hs.413137	486	ENST00000317594
A_23_P140190	0.0134835	3.52628	down	547.644	1294.15	8.12767	9.94582	372.266	99.1247	424.444	438.208	3085.73	1105.6	8.09282	6.52999	10.8093	8.56761	10.9353	9.28543	NR_026800	chr14:106388126-106388185	KIAA0125	Homo sapiens KIAA0125 (KIAA0125), non-coding RNA [NR_026800]		NR_026800		9834	ENST00000432369
A_33_P3233871	0.0293824	1.81809	down	166.937	352.848	6.75361	7.61603	631.295	231.772	29.1643	48.6652	398.085	220.374	8.76135	7.63699	6.07759	5.47694	8.00916	7.14691	NM_000505	chr5:176829201-176829142	F12	Homo sapiens coagulation factor XII (Hageman factor) (F12), mRNA [NM_000505]	GO:0016540|GO:0004252|GO:0051919|GO:0005576|GO:0005615|GO:0051787|GO:0051605|GO:0051788|GO:0005488|GO:0010756|GO:0030194|GO:0002542|GO:0007597|GO:0045087|GO:0006508|GO:0008233|GO:0070009|GO:0031638	NM_000505	Hs.1321	2161	ENST00000253496
A_24_P316939	0.0186766	1.70306	down	805.079	1215.16	9.13955	9.90767	1870.1	880.088	200.123	631.76	1575.26	903.387	10.2031	9.35327	9.61137	9.05439	9.90854	9.01097	NM_001137550	chr2:238688558-238688617	LRRFIP1	Homo sapiens leucine rich repeat (in FLII) interacting protein 1 (LRRFIP1), transcript variant 1, mRNA [NM_001137550]	GO:0016564|GO:0005515|GO:0003725|GO:0005737|GO:0006357|GO:0016481|GO:0005634|GO:0005856|GO:0003677	NM_001137550	Hs.471779	9208	ENST00000308482
A_24_P390060	0.0167409	1.89637	down	44.2354	70.1962	5.26944	6.19268	101.631	50.2341	32.0858	38.0423	76.8717	44.4297	6.45077	5.62212	6.2527	5.0893	5.87458	5.09691	NM_138451	chr12:113633351-113633292	IQCD	Homo sapiens IQ motif containing D (IQCD), mRNA [NM_138451]		NM_138451	Hs.568276	115811	ENST00000416617
A_23_P368896	0.0194248	1.68311	down	206.784	305.401	7.36354	8.11467	485.435	201.88	86.3624	197.38	344.405	221.092	8.41364	7.45122	8.11499	7.48892	7.81538	7.15049	NM_013346	chrX:070280941-070280882	SNX12	Homo sapiens sorting nexin 12 (SNX12), mRNA [NM_013346]	GO:0005515|GO:0007154|GO:0035091|GO:0015031	NM_013346	Hs.260750	29934	ENST00000374281
A_23_P361405	0.0293215	1.63225	down	584.756	1002.65	8.46531	9.17217	2361.01	1135.37	110.02	305.042	536.931	313.857	10.5487	9.70945	8.54524	8.08573	8.42255	7.60075	NM_003549	chr3:050330448-050330389	HYAL3	Homo sapiens hyaluronoglucosaminidase 3 (HYAL3), mRNA [NM_003549]	GO:0005975|GO:0016798|GO:0008152|GO:0005576|GO:0004415|GO:0005764	NM_003549	Hs.129910	8372	ENST00000336307
A_23_P47709	0.00536891	1.5494	down	238.581	297.932	7.48316	8.11487	260.686	152.428	92.9899	221.782	540.119	341.532	7.66204	7.10154	8.2517	7.63612	8.43088	7.71182	NM_000803	chr11:071932884-071932943	FOLR2	Homo sapiens folate receptor 2 (fetal) (FOLR2), transcript variant 1, mRNA [NM_000803]	GO:0005542|GO:0005886|GO:0015884|GO:0005624|GO:0005576|GO:0004872|GO:0031225	NM_000803	Hs.433159	2350	ENST00000298223
A_32_P351968	0.0229933	2.02917	down	5801.92	9579.25	11.6508	12.6717	4422.36	1966.69	1595.6	2945.45	22719.8	12493.6	11.4251	10.5075	12.6292	11.2989	13.9606	13.1458	NM_002118	chr6:032902563-032902504	HLA-DMB	Homo sapiens major histocompatibility complex, class II, DM beta (HLA-DMB), mRNA [NM_002118]	GO:0006955|GO:0005886|GO:0002504|GO:0042613|GO:0016021|GO:0005764|GO:0005768	NM_002118	Hs.654428	3109	ENST00000374850
A_33_P3249185	0.0335566	1.92354	down	539.789	785.607	8.60649	9.55025	1191.35	581.757	235.433	446.85	930.038	590.759	9.59276	8.78714	9.88876	8.59294	9.16924	8.43938		chr10:71917549-71917490		GTP-binding protein SAR1a (COPII-associated small GTPase) [Source:UniProtKB/Swiss-Prot;Acc:Q9NR31] [ENST00000373236]					ENST00000373236
A_24_P97374	0.0167063	1.69741	down	1379.55	2235.63	9.59823	10.3616	4925.23	2722.09	196.287	521.522	1585.38	895.049	11.5827	11.0032	9.58159	8.79405	9.92046	8.99744	NM_005442	chr3:027758200-027758141	EOMES	Homo sapiens eomesodermin homolog (Xenopus laevis) (EOMES), mRNA [NM_005442]	GO:0006355|GO:0001706|GO:0003700|GO:0001707|GO:0060706|GO:0007420|GO:0016563|GO:0007275|GO:0005634|GO:0002302|GO:0060809	NM_005442	Hs.591663	8320	ENST00000449599
A_23_P99653	0.0263493	1.63144	down	1211.02	1292.79	9.64649	10.3526	1275.59	712.113	483.755	1716.14	2119.02	1204.81	9.68562	9.06375	11.0245	10.4652	10.3477	9.41051		chr14:22386871-22386930		Putative uncharacterized protein ENSP00000374946 [Source:UniProtKB/TrEMBL;Acc:A6NET9] [ENST00000390439]					ENST00000390439	NP1164038
A_24_P255654	0.0109175	1.87354	down	953.129	1426.34	9.33418	10.2399	1954.61	880.464	278.94	645.62	2045.46	1333.3	10.2679	9.35425	10.1569	9.08992	10.295	9.55836	XR_019265	chr12:053547983-053548043	LOC728698	PREDICTED: Homo sapiens similar to eukaryotic translation initiation factor 4A (LOC728698), miscRNA [XR_019265]		XR_019265	Hs.614792	728698
A_23_P137948	0.00967473	1.60203	down	7796.46	10560.7	12.6039	13.2838	11977.9	6229	3083.17	6579.21	16621	10581.2	12.9304	12.3019	13.4394	12.626	13.4815	12.8838	NM_013349	chr1:212619293-212619352	NENF	Homo sapiens neuron derived neurotrophic factor (NENF), transcript variant 1, mRNA [NM_013349]	GO:0005576|GO:0043410|GO:0008083|GO:0005615|GO:0046872|GO:0020037	NM_013349	Hs.461787	29937	ENST00000366988
A_23_P98580	0.0108188	4.28957	down	3468.62	12896.6	11.0827	13.1835	20718.9	3780.82	1219.73	1176.96	16751.2	5448.1	13.7701	11.4886	12.2844	9.9259	13.496	11.8335	NM_004265	chr11:061634754-061634813	FADS2	Homo sapiens fatty acid desaturase 2 (FADS2), mRNA [NM_004265]	GO:0006636|GO:0016020|GO:0005887|GO:0005783|GO:0004768|GO:0016491|GO:0006810|GO:0005624|GO:0022900|GO:0020037	NM_004265	Hs.502745	9415	ENST00000278840
A_24_P343095	0.0156864	1.59856	down	1590.44	2260.83	10.0139	10.6907	3977.37	2123.79	282.841	777.005	2522.27	1870.51	11.2753	10.6235	10.1745	9.33824	10.6223	10.08	NM_000791	chr18:023750708-023750649	DHFR	Homo sapiens dihydrofolate reductase (DHFR), mRNA [NM_000791]	GO:0050661|GO:0016491|GO:0006545|GO:0005575|GO:0006730|GO:0009165|GO:0055114|GO:0004146	NM_000791	Hs.648635	1719	ENST00000439211	NP098266
A_24_P75190	0.0126151	1.85464	down	74.6741	103.633	5.85434	6.74547	69.8297	32.7291	57.1431	82.3114	183.927	108.982	5.90881	5.03296	7.32392	6.25062	7.00368	6.27943	NM_000519	chr11:005255317-005255258	HBD	Homo sapiens hemoglobin, delta (HBD), mRNA [NM_000519]	GO:0019825|GO:0005833|GO:0006810|GO:0005344|GO:0046872|GO:0020037|GO:0015671	NM_000519	Hs.699280	3045	ENST00000429817
A_33_P3239914	0.049326	1.53949	down	30.3212	36.2581	4.73029	5.35274	35.4164	21.8527	29.1038	40.8335	44.2541	28.2775	4.84643	4.47469	6.07275	5.20357	5.13906	4.51263	AK127222	chr7:157857316-157857257	LOC100130741	Homo sapiens cDNA FLJ45289 fis, clone BRHIP3002363. [AK127222]			Hs.661989	100130741
A_23_P88331	0.0448827	3.03425	down	1783.55	4409.87	9.94402	11.5454	7540	1880.15	374.243	427.918	5315.37	3042.59	12.2438	10.4405	10.6158	8.53287	11.7765	10.8587	NM_014750	chr14:055615172-055615113	DLGAP5	Homo sapiens discs, large (Drosophila) homolog-associated protein 5 (DLGAP5), transcript variant 1, mRNA [NM_014750]	GO:0005515|GO:0007049|GO:0005737|GO:0008283|GO:0000087|GO:0045842|GO:0007267|GO:0031616|GO:0005634|GO:0004721|GO:0007079	NM_014750	Hs.77695	9787	ENST00000247191
A_32_P918263	0.037173	1.89522	down	50.6546	84.8591	5.46124	6.38361	138.897	53.4099	33.4079	42.813	82.2722	55.7408	6.86086	5.70808	6.32511	5.27173	5.96486	5.40392		chr7:055706201-055706142
A_33_P3286318	0.00528408	1.63301	down	14068.4	23455.7	13.3955	14.103	29717.8	15085.7	2616.21	6043.97	38033.2	21075.4	14.3323	13.7213	13.2588	12.4713	14.718	13.9939	XR_015812	chr11:064941728-064941669	LOC440043	PREDICTED: Homo sapiens similar to Phosphoglycerate mutase 1 (Phosphoglycerate mutase isozyme B) (PGAM-B) (BPG-dependent PGAM 1) (LOC440043), miscRNA [XR_015812]		XR_015812	Hs.632124	440043
A_23_P218476	0.0327922	1.7034	down	1085.88	1270.67	9.562	10.3304	2104.06	1063.48	508.273	1301.93	1199.67	892.245	10.3749	9.61953	11.0958	10.0739	9.5206	8.99253	NM_030578	chr19:041860457-041860398	B9D2	Homo sapiens B9 protein domain 2 (B9D2), mRNA [NM_030578]	GO:0005929|GO:0030030|GO:0005634|GO:0005932|GO:0035085	NM_030578	Hs.567596	80776	ENST00000243578
A_33_P3303687	0.0330436	1.5435	down	1088.54	1430.08	9.47923	10.1054	2085.87	1027.38	209.809	614.044	1994.57	1624.19	10.3639	9.5665	9.69635	9.0183	10.256	9.85288	NM_002802	chr7:136399879-136399938	PSMC1	Homo sapiens proteasome (prosome, macropain) 26S subunit, ATPase, 1 (PSMC1), mRNA [NM_002802]	GO:0005515|GO:0000502|GO:0005730|GO:0051437|GO:0005634|GO:0051436|GO:0005524|GO:0031145|GO:0030163|GO:0005737|GO:0000166|GO:0016787|GO:0016887	NM_002802	Hs.356654	5700	ENST00000261303
A_33_P3315243	0.0270426	1.52453	down	179.699	286.524	6.63863	7.247	710.27	406.252	36.2703	70.1701	113.033	62.6762	8.90907	8.34261	6.46811	6.01192	6.3638	5.56137	NM_001164257	chr17:062080413-062080472	C17orf72	Homo sapiens chromosome 17 open reading frame 72 (C17orf72), mRNA [NM_001164257]		NM_001164257	Hs.708161	92340	ENST00000412177
A_24_P307486	0.0332235	1.85664	down	587.532	826.649	8.69226	9.58495	1084.68	522.775	224.428	447.898	1170.84	791.924	9.45953	8.6559	9.81184	8.596	9.48349	8.82487		chr6:031487938-031487879
A_23_P154065	0.0308292	1.76228	down	17925.2	32019.8	13.9854	14.8028	53606.2	19880.1	7493.27	15756.8	34960	18138.6	15.2573	14.1805	14.5691	14.001	14.5821	13.7747	NM_006000	chr2:220115129-220115070	TUBA4A	Homo sapiens tubulin, alpha 4a (TUBA4A), mRNA [NM_006000]	GO:0005515|GO:0051258|GO:0000166|GO:0005198|GO:0005874|GO:0003924|GO:0005576|GO:0005525|GO:0007018|GO:0005829	NM_006000	Hs.75318	7277	ENST00000392088
A_33_P3239184	0.0278572	1.75133	down	836.188	1316.67	8.9677	9.77615	1340.58	794.511	141.048	295.22	2468.39	1418.83	9.75214	9.21931	8.99361	8.04294	10.5827	9.64085	XM_001719493	chr19:011697228-011697287	LOC100134235	PREDICTED: Homo sapiens similar to hCG1642820 (LOC100134235), mRNA [XM_001719493]		XM_001719493		100134235
A_23_P73493	0.00707469	1.70881	down	791.627	965.724	9.10995	9.88294	1299.07	593.972	305.428	914.117	1292.67	866.791	9.71225	8.81393	10.3052	9.56269	9.63137	8.95324	NM_004344	chrX:151996240-151996181	CETN2	Homo sapiens centrin, EF-hand protein, 2 (CETN2), mRNA [NM_004344]	GO:0005515|GO:0008026|GO:0032465|GO:0007099|GO:0005814|GO:0005509|GO:0007283|GO:0031683|GO:0003676|GO:0005524|GO:0005829|GO:0005622|GO:0007049|GO:0007067|GO:0032391|GO:0005932|GO:0051301	NM_004344	Hs.82794	1069	ENST00000370277
A_23_P38154	0.00882627	1.64446	down	4932.77	6532.48	11.7847	12.5023	13453.4	6474.58	2489.19	5715.7	3654.84	2608.02	13.1295	12.367	13.1895	12.3833	11.1879	10.6037	NM_004110	chr17:072858709-072858650	FDXR	Homo sapiens ferredoxin reductase (FDXR), nuclear gene encoding mitochondrial protein, transcript variant 2, mRNA [NM_004110]	GO:0006629|GO:0005739|GO:0005515|GO:0006694|GO:0004324|GO:0005759|GO:0016491|GO:0006810|GO:0022900|GO:0008203	NM_004110	Hs.69745	2232	ENST00000442102
A_33_P3292540	0.0128217	1.5493	down	3002.43	3696.52	11.0998	11.7314	5237.42	3074.55	892.569	2783.03	4959.56	3149.7	11.6755	11.1769	11.8605	11.2112	11.6583	10.9114	NM_078626	chr1:051439963-051440022	CDKN2C	Homo sapiens cyclin-dependent kinase inhibitor 2C (p18, inhibits CDK4) (CDKN2C), transcript variant 2, mRNA [NM_078626]	GO:0005515|GO:0030308|GO:0008285|GO:0019901|GO:0048709|GO:0005634|GO:0000079|GO:0006917|GO:0042326|GO:0000082|GO:0005737|GO:0007049|GO:0004861|GO:0007050	NM_078626	Hs.525324	1031	ENST00000371761
A_33_P3221303	0.0129505	1.66442	down	213.832	294.752	7.40098	8.136	459.963	237.645	95.2916	185.206	329	218.644	8.35162	7.66895	8.29655	7.39625	7.75984	7.13774	NM_016602	chr17:040831479-040831420	CCR10	Homo sapiens chemokine (C-C motif) receptor 10 (CCR10), mRNA [NM_016602]	GO:0005515|GO:0007165|GO:0007186|GO:0006935|GO:0005886|GO:0005887|GO:0004930|GO:0016493|GO:0004872|GO:0007204	NM_016602	Hs.278446	2826	ENST00000332438
A_24_P125839	0.00392931	1.70574	down	1205.75	1492.38	9.69129	10.4617	2590.21	1334.56	451.415	1436.86	1435.51	845.823	10.691	9.94575	10.9163	10.2143	9.77774	8.91376	NM_017447	chr21:019165778-019165719	C21orf91	Homo sapiens chromosome 21 open reading frame 91 (C21orf91), transcript variant 2, mRNA [NM_017447]		NM_017447	Hs.293811	54149	ENST00000400558
A_23_P251031	0.0267881	1.87146	down	3075.82	6764.62	9.6274	10.5316	19246.5	8387.58	124.294	215.202	923.053	624.68	13.6699	12.7644	8.76546	7.60037	9.15932	8.51743	NM_002188	chr5:131996738-131996797	IL13	Homo sapiens interleukin 13 (IL13), mRNA [NM_002188]	GO:0005515|GO:0030890|GO:0005144|GO:0050714|GO:0007267|GO:0006928|GO:0005576|GO:0005625|GO:0005125|GO:0005615|GO:0043270|GO:0007165|GO:0006955|GO:0006954|GO:0002639	NM_002188	Hs.845	3596	ENST00000304506
A_33_P3218356	0.0304319	1.66074	down	1872.7	2544.31	10.3177	11.0495	4336.57	2509.75	464.213	1225.78	2832.14	1882.57	11.4001	10.8779	10.9534	9.98165	10.7951	10.0934	NM_020141	chr1:109637359-109637418	TMEM167B	Homo sapiens transmembrane protein 167B (TMEM167B), mRNA [NM_020141]	GO:0016020|GO:0016021	NM_020141	Hs.82933	56900	ENST00000338272
A_23_P171077	0.00215797	1.93355	down	8550.87	15422.1	12.7034	13.6547	31449.1	12706.3	3453.56	7079.39	11363.7	5866.91	14.4415	13.4321	13.5903	12.726	12.9322	11.9522	NM_006579	chrX:048386942-048387001	EBP	Homo sapiens emopamil binding protein (sterol isomerase) (EBP), mRNA [NM_006579]	GO:0030097|GO:0004769|GO:0005792|GO:0006695|GO:0000247|GO:0005783|GO:0047750|GO:0001501|GO:0016020|GO:0005887|GO:0016853|GO:0015238|GO:0004888	NM_006579	Hs.30619	10682	ENST00000495186
A_33_P3323068	0.0419931	1.5185	down	75.789	110.173	5.96401	6.56665	95.6381	60.6724	31.0498	58.1267	203.831	108.568	6.37393	5.88567	6.19485	5.73247	7.13118	6.27388	NM_020133	chr6:161587364-161587305	AGPAT4	Homo sapiens 1-acylglycerol-3-phosphate O-acyltransferase 4 (lysophosphatidic acid acyltransferase, delta) (AGPAT4), mRNA [NM_020133]	GO:0005515|GO:0016020|GO:0008152|GO:0016021|GO:0008654|GO:0005575|GO:0003841|GO:0046027|GO:0016740|GO:0008415|GO:0005829	NM_020133	Hs.353175	56895	ENST00000366905
A_33_P3411075	0.00266781	2.12524	down	2253.95	4316.35	10.434	11.5216	6084.35	2535.02	356.227	779.981	6508.47	3446.85	11.9165	10.8933	10.5442	9.3444	12.1042	11.0643	NM_003088	chr7:005646220-005646279	FSCN1	Homo sapiens fascin homolog 1, actin-bundling protein (Strongylocentrotus purpuratus) (FSCN1), mRNA [NM_003088]	GO:0005737|GO:0051015|GO:0030036|GO:0005886|GO:0008283|GO:0030175|GO:0030674|GO:0015629|GO:0051017	NM_003088	Hs.118400	6624	ENST00000340250
A_23_P34233	0.0327801	1.83201	down	803.192	1160.84	9.06669	9.94012	1147.87	658.378	244.939	529.289	2089.7	1221.91	9.53971	8.95816	9.9546	8.81282	10.326	9.42909	NM_014298	chr16:029708670-029708729	QPRT	Homo sapiens quinolinate phosphoribosyltransferase (QPRT), mRNA [NM_014298]	GO:0005737|GO:0016757|GO:0004514|GO:0008152|GO:0019363|GO:0009435|GO:0005575|GO:0051259|GO:0042803|GO:0034213|GO:0005829	NM_014298	Hs.513484	23475	ENST00000219771
A_33_P3351276	0.0200674	1.51213	down	41.7281	48.6655	5.13975	5.73634	49.6566	24.3713	29.7931	53.6547	66.5467	47.1584	5.38904	4.62093	6.12306	5.61718	5.69692	5.18115		chr16:032822588-032822529
A_23_P259874	0.0256768	1.61619	down	975.379	1057.81	9.40335	10.0959	1350.22	837.571	415.56	1238.73	1407.66	849.831	9.76086	9.29232	10.7735	9.99674	9.75343	8.92098	NM_012430	chr3:122990740-122990799	SEC22A	Homo sapiens SEC22 vesicle trafficking protein homolog A (S. cerevisiae) (SEC22A), mRNA [NM_012430]	GO:0006888|GO:0005215|GO:0016020|GO:0005783|GO:0005789|GO:0016021|GO:0016192|GO:0015031	NM_012430	Hs.477361	26984	ENST00000309934
A_23_P49768	0.042705	1.89449	down	3127.63	4687.9	11.136	12.0578	9167.26	3739.07	1467.17	3097.62	3429.29	2546.19	12.5548	11.4656	12.5246	11.3779	11.0941	10.5646	NM_016504	chr17:048445492-048445433	MRPL27	Homo sapiens mitochondrial ribosomal protein L27 (MRPL27), nuclear gene encoding mitochondrial protein, mRNA [NM_016504]	GO:0005739|GO:0005622|GO:0003735|GO:0005840|GO:0006412|GO:0005762	NM_016504	Hs.7736	51264	ENST00000393275
A_23_P166459	0.00311674	2.19702	down	61922.6	131017	15.5339	16.6695	196425	89141.8	18152.6	20386.9	178474	76238.9	17.3181	16.3084	15.6146	14.4004	17.0756	15.893	NM_002305	chr22:038075652-038075711	LGALS1	Homo sapiens lectin, galactoside-binding, soluble, 1 (LGALS1), mRNA [NM_002305]	GO:0005529|GO:0005578|GO:0016936|GO:0005576|GO:0042981|GO:0005615|GO:0042803|GO:0005622|GO:0005737|GO:0001948|GO:0045445|GO:0004871|GO:0043123	NM_002305	Hs.445351	3956	ENST00000425542
A_33_P3377209	0.0258198	1.52091	down	342.989	459.626	7.96723	8.57217	933.145	491.565	121.501	284.336	324.231	253.065	9.25726	8.58447	8.72085	7.9885	7.7384	7.32873	NM_207168	chr1:150599867-150599808	ENSA	Homo sapiens endosulfine alpha (ENSA), transcript variant 8, mRNA [NM_207168]	GO:0005737|GO:0007584|GO:0006810|GO:0005102|GO:0008200	NM_207168	Hs.632456	2029	ENST00000362052
A_23_P164228	0.00475756	1.93974	down	2604.58	3731.88	10.8766	11.8325	6166.14	2636.86	1239.99	2868.16	3789.51	2308.72	11.9439	10.954	12.3034	11.2537	11.2503	10.4222	NM_005175	chr14:031789822-031789763	ATP5G1	Homo sapiens ATP synthase, H+ transporting, mitochondrial F0 complex, subunit C1 (subunit 9) (ATP5G1), nuclear gene encoding mitochondrial protein, transcript variant 1, mRNA [NM_005175]	GO:0005739|GO:0005215|GO:0015986|GO:0016020|GO:0015078|GO:0016021|GO:0045263|GO:0015992|GO:0008289|GO:0006811|GO:0005753	NM_005175	Hs.80986	516	ENST00000393366
A_23_P126278	0.0308996	1.51333	down	143.363	205.006	6.49369	7.09141	162.623	80.5257	29.797	56.8366	422.6	292.726	7.05956	6.26461	6.12325	5.69861	8.09143	7.51784	NM_003465	chr1:203188441-203188382	CHIT1	Homo sapiens chitinase 1 (chitotriosidase) (CHIT1), mRNA [NM_003465]	GO:0008061|GO:0009617|GO:0006032|GO:0006955|GO:0043169|GO:0005975|GO:0008152|GO:0005576|GO:0005764|GO:0005615|GO:0004568|GO:0000272	NM_003465	Hs.201688	1118	ENST00000362046	NP285492
A_24_P927325	0.0303089	1.60749	down	54.514	73.2581	5.53567	6.22049	114.151	73.6	31.9414	45.5905	73.6814	44.3514	6.59666	6.1406	6.24434	5.37157	5.82046	5.09485	NM_015531	chr11:073745605-073745546	C2CD3	Homo sapiens C2 calcium-dependent domain containing 3 (C2CD3), mRNA [NM_015531]	GO:0030162|GO:0021997|GO:0001947|GO:0042384|GO:0007389|GO:0016485|GO:0008589|GO:0007420|GO:0021915|GO:0005932|GO:0001701|GO:0042733	NM_015531	Hs.694798	26005	ENST00000313663
A_23_P150316	0.0239237	4.18743	down	562.655	2870.23	6.38727	8.45333	125.327	37.7299	30.3479	19.7044	8455.01	1630.53	6.7226	5.22831	6.15671	4.07405	12.4807	9.85943	NM_002426	chr11:102733653-102733594	MMP12	Homo sapiens matrix metallopeptidase 12 (macrophage elastase) (MMP12), mRNA [NM_002426]	GO:0050679|GO:0042493|GO:0008152|GO:0005509|GO:0006508|GO:0005578|GO:0008270|GO:0008233|GO:0005576|GO:0004222	NM_002426	Hs.1695	4321	ENST00000326227
A_33_P3354464	0.0337673	1.58811	down	138.676	208.312	6.56675	7.23406	342.185	186.496	33.4512	47.2906	249.3	182.242	7.98755	7.34645	6.32721	5.43003	7.38741	6.92377	NM_005576	chr15:074241855-074241914	LOXL1	Homo sapiens lysyl oxidase-like 1 (LOXL1), mRNA [NM_005576]	GO:0005515|GO:0016641|GO:0005507|GO:0016491|GO:0005578|GO:0005576|GO:0018277|GO:0005615|GO:0046872|GO:0055114	NM_005576	Hs.65436	4016	ENST00000395162
A_23_P209129	0.0200381	3.2594	down	2425.11	6284.09	10.5879	12.2925	10183.3	3095.94	869.795	963.943	7799.19	3215.44	12.6952	11.1852	11.8247	9.63331	12.3577	10.9452	NM_002288	chr19:055021809-055021868	LAIR2	Homo sapiens leukocyte-associated immunoglobulin-like receptor 2 (LAIR2), transcript variant 1, mRNA [NM_002288]	GO:0005576|GO:0004872	NM_002288	Hs.43803	3904	ENST00000301202
A_23_P128147	0.0336449	2.40569	down	31536.7	79933.2	14.5929	15.8593	126968	30577.6	9866.74	12480.8	102965	51551.7	16.5011	14.8188	14.8777	13.6173	16.1992	15.3425	NM_006082	chr12:049521692-049521633	TUBA1B	Homo sapiens tubulin, alpha 1b (TUBA1B), mRNA [NM_006082]	GO:0005515|GO:0051258|GO:0000166|GO:0005874|GO:0005200|GO:0003924|GO:0000226|GO:0005525|GO:0007018	NM_006082	Hs.524390	10376	ENST00000336023
A_23_P308581	0.0282954	1.61146	down	6271.04	8101.68	12.2595	12.9479	14604.1	6344.34	3211.4	7779.09	6489.52	4689.67	13.251	12.3315	13.4916	12.8749	12.101	11.5721	NM_033112	chr6:042997172-042997231	C6orf153	Homo sapiens chromosome 6 open reading frame 153 (C6orf153), mRNA [NM_033112]		NM_033112	Hs.309231	88745	ENST00000244496
A_23_P38567	0.0385678	1.57708	down	348.382	518.011	7.873	8.53025	342.673	205.326	89.5566	224.146	1121.8	615.675	7.9888	7.47146	8.18195	7.65056	9.42001	8.49697	NM_152904	chr17:020140333-020140392	CYTSB	Homo sapiens cytospin B (CYTSB), transcript variant NSP5beta3alpha, mRNA [NM_152904]	GO:0005634	NM_152904	Hs.431045	92521	ENST00000395525
A_23_P32707	0.0452126	1.74814	down	902.063	1454.15	9.07473	9.88055	2652.96	1172.16	142.607	289.964	1566.88	1244.07	10.7251	9.75576	9.01353	8.01672	9.90306	9.45172	NM_012291		ESPL1	Homo sapiens extra spindle pole bodies homolog 1 (S. cerevisiae) (ESPL1), mRNA [NM_012291]	GO:0005515|GO:0005813|GO:0045842|GO:0006915|GO:0005634|GO:0045875|GO:0000212|GO:0000910|GO:0000070|GO:0005737|GO:0007059|GO:0045143|GO:0040001|GO:0006508|GO:0008233|GO:0008234	NM_012291	Hs.153479	9700	ENST00000257934
A_33_P3340852	0.00430194	2.46802	down	1470.08	3052.34	9.76887	11.0722	3000.88	926.595	323.415	671.14	5832.73	2812.5	10.8988	9.42771	10.3959	9.14517	11.922	10.7337	XM_002347477	chr14:106066502-106066443	LOC100289760	Ig epsilon chain C region [Source:UniProtKB/Swiss-Prot;Acc:P01854] [ENST00000390541]		XM_002347477		100289760	ENST00000390541
A_23_P91430	0.015587	2.06152	down	1326.93	2077.17	9.85637	10.9001	3338	1287.61	529.37	1187.24	2364.14	1505.95	11.0321	9.89031	11.1488	9.94213	10.5193	9.73667	NM_007238	chr20:032295458-032295399	PXMP4	Homo sapiens peroxisomal membrane protein 4, 24kDa (PXMP4), transcript variant 1, mRNA [NM_007238]	GO:0016020|GO:0005624|GO:0016021|GO:0005778|GO:0005777	NM_007238	Hs.654857	11264	ENST00000217398
A_33_P3251776	0.0499185	1.67508	down	949.256	1274.06	9.03248	9.77671	1272.62	573.081	149.384	327.079	2400.18	1947.61	9.68372	8.77064	9.10262	8.18164	10.5438	10.1452	NM_001142777	chr16:031000282-031000341	HSD3B7	Homo sapiens hydroxy-delta-5-steroid dehydrogenase, 3 beta- and steroid delta-isomerase 7 (HSD3B7), transcript variant 2, mRNA [NM_001142777]	GO:0016020|GO:0006699|GO:0005783|GO:0005488|GO:0016491|GO:0047016|GO:0016021|GO:0005575|GO:0003854|GO:0055114	NM_001142777	Hs.460618	80270	ENST00000353250
A_23_P70445	0.0104443	1.56652	down	316.061	348.12	7.89164	8.5392	433.118	223.913	152.362	389.722	458.879	334.548	8.28046	7.58778	9.13579	8.40206	8.20136	7.68508	NM_003532	chr6:026225566-026225625	HIST1H3E	Homo sapiens histone cluster 1, H3e (HIST1H3E), mRNA [NM_003532]		NM_003532	Hs.443021	8353	ENST00000360408
A_23_P160159	0.00772899	2.95795	down	369.58	1004.19	7.23064	8.79524	237.392	79.7355	86.7349	89.7619	2688.45	939.242	7.54302	6.25036	8.12235	6.37747	10.7203	9.0641	NM_003039	chr1:009097229-009097170	SLC2A5	Homo sapiens solute carrier family 2 (facilitated glucose/fructose transporter), member 5 (SLC2A5), transcript variant 1, mRNA [NM_003039]	GO:0015755|GO:0005215|GO:0015758|GO:0005886|GO:0005975|GO:0022891|GO:0005353|GO:0008643|GO:0016021|GO:0055085|GO:0005355	NM_003039	Hs.530003	6518	ENST00000456780
A_24_P307974	0.00940992	1.86138	down	437.932	533.872	8.22304	9.11942	948.896	379.675	277.073	703.691	375.647	230.431	9.27732	8.25709	10.1482	9.20656	7.93269	7.20549	BC033728	chr6:42025277-42025336		Transcription initiation factor TFIID subunit 8 (TBP-associated factor 8)(Transcription initiation factor TFIID 43 kDa subunit)(TBP-associated factor 43 kDa)(hTAFII43)(Protein taube nuss) [Source:UniProtKB/Swiss-Prot;Acc:Q7Z7C8] [ENST00000372978]					ENST00000372978
A_33_P3237605	0.0194934	1.59952	down	45.8135	52.452	5.25577	5.93341	68.8764	32.399	40.4448	72.0564	48.0349	32.9851	5.88944	5.02263	6.6607	6.04898	5.25009	4.69569		chr4:007472184-007472125
A_23_P218131	0.00182664	1.69915	down	1428.8	1926.3	9.93573	10.7005	3709.13	1816.09	476.661	1414.98	1593.13	1055.34	11.1741	10.3936	11.0012	10.1892	9.92632	9.22437	NM_032714	chr14:105171047-105171106	INF2	Homo sapiens inverted formin, FH2 and WH2 domain containing (INF2), transcript variant 3, mRNA [NM_032714]	GO:0030036|GO:0017048|GO:0003779|GO:0016043	NM_032714	Hs.24956	64423	ENST00000398337
A_23_P389525	0.0423393	1.55226	down	5427.45	6209.51	12.0441	12.6784	9423.6	5603.63	3172.35	6397.82	6032.58	4280.9	12.5834	12.1378	13.4722	12.5766	11.9797	11.4178	NM_152516	chr2:062228030-062228089	COMMD1	Homo sapiens copper metabolism (Murr1) domain containing 1 (COMMD1), mRNA [NM_152516]	GO:0005737|GO:0005634|GO:0042802	NM_152516	Hs.468702	150684	ENST00000311832

## Sheet: Sheet2
# Fold-Change cut-off: 1.5 # P-value cut-off: 0.05 # Condition pairs: Test 4 (PBMC + HIV-2 ROD Day 7) vs Control 1 (No virus control day 7) # Column A: ProbeName, it represents probe name. # Column B: P-value, P-value calculated from paired t-test. # Column C: Fold change, the absolute ratio (no log scale) of normalized intensities between two conditions. # Column D: Regulation, it depicts which …
Test 4 (PBMC + HIV-2 ROD Day 7) vs Control 1 (No virus control day 7) 1.5 fold up regulated genes
	P-value	Fold change and Regulation		Group--Raw Intensity		Group--Normalized Intensity		Raw Intensity						Normalized Intensity						Annotations
ProbeName	P-value	FCAbsolute	regulation	Test 4(raw)	Control 1(raw)	Test 4(normalized)	Control 1(normalized)	[22-17, Control 1](raw)	[22-47, Test 4](raw)	[43-17, Control 1](raw)	[43-47, Test 4](raw)	[P1-7, Control 1](raw)	[P4-7, Test 4](raw)	[22-17, Control 1](normalized)	[22-47, Test 4](normalized)	[43-17, Control 1](normalized)	[43-47, Test 4](normalized)	[P1-7, Control 1](normalized)	[P4-7, Test 4](normalized)	GenbankAccession	GenomicCoordinates	GeneSymbol	Description	Go	RefSeqAccession	UniGeneID	EntrezGeneID	EnsemblID	TIGRID
A_23_P123265	0.0438449	1.78918	up	435.801	176.808	8.30502	7.46573	184.267	379.215	67.811	354.887	278.346	573.301	7.22006	8.23194	7.64936	8.12526	7.52776	8.55787	NM_015411	chr7:056147679-056147738	SUMF2	Homo sapiens sulfatase modifying factor 2 (SUMF2), transcript variant 2, mRNA [NM_015411]	GO:0005783|GO:0005488|GO:0005509|GO:0005788	NM_015411	Hs.279696	25870	ENST00000418349
A_23_P217015	0.0246957	1.83487	up	163.014	69.2812	6.98964	6.11396	107.06	181.326	28.2363	128.672	72.5472	179.046	6.5207	7.2575	6.02008	6.7542	5.8011	6.95722	NM_003011	chr1:092540457-092540398	SET	Homo sapiens SET nuclear oncogene (SET), transcript variant 2, mRNA [NM_003011]	GO:0048471|GO:0005783|GO:0004864|GO:0008601|GO:0006334|GO:0005634|GO:0006337|GO:0035067|GO:0005829|GO:0006913|GO:0006260|GO:0042393|GO:0005737|GO:0005654	NM_003011	Hs.436687	6418	ENST00000409104
A_33_P3297245	0.0225379	1.75059	up	4820.58	2699.26	11.7574	10.9495	5491.08	6684.33	390.345	4259.28	2216.36	3518.12	11.7463	12.3257	10.6801	11.6828	10.4222	11.2636	NM_012250	chr11:014299525-014299466	RRAS2	Homo sapiens related RAS viral (r-ras) oncogene homolog 2 (RRAS2), transcript variant 1, mRNA [NM_012250]	GO:0005622|GO:0005515|GO:0007165|GO:0030335|GO:0005886|GO:0000166|GO:0009987|GO:0005783|GO:0003924|GO:0007265|GO:0005525	NM_012250	Hs.502004	22800	ENST00000256196
A_24_P390070	0.0129697	2.2218	up	3918.89	1677.43	11.4335	10.2817	3393.61	5485.09	263.637	3094.12	1375.04	3177.46	11.0538	11.9984	10.0748	11.1869	9.71673	11.1151	NM_003769	chr12:120903559-120903500	SFRS9	Homo sapiens splicing factor, arginine/serine-rich 9 (SFRS9), mRNA [NM_003769]	GO:0008380|GO:0000166|GO:0000398|GO:0003723|GO:0006376|GO:0005634	NM_003769	Hs.706889	8683	ENST00000229390
A_23_P88119	0.0164598	1.52125	up	12906.9	8545.21	13.2544	12.6491	14591.4	17676.3	952.343	8128.93	10091.9	12915.6	13.2482	13.8363	11.948	12.6973	12.7512	13.2296	NM_006644	chr13:031710855-031710796	HSPH1	Homo sapiens heat shock 105kDa/110kDa protein 1 (HSPH1), mRNA [NM_006644]	GO:0006986|GO:0005737|GO:0000166|GO:0005524	NM_006644	Hs.36927	10808	ENST00000320027
A_23_P152984	0.0145856	1.6788	up	4274.33	2262.17	11.4948	10.7473	4806.91	6254.54	419.833	4378.02	1559.78	2190.43	11.5534	12.2131	10.7933	11.7233	9.89521	10.5479	NM_005782	chr17:079845823-079845764	THOC4	Homo sapiens THO complex 4 (THOC4), mRNA [NM_005782]	GO:0008380|GO:0005515|GO:0005737|GO:0016607|GO:0000166|GO:0000398|GO:0003723|GO:0000346|GO:0006810|GO:0005681|GO:0005634|GO:0046784	NM_005782	Hs.534385	10189	ENST00000331204
A_33_P3799936	0.00751741	1.61308	up	1017.35	694.669	8.56464	7.87482	80.583	135.138	55.6392	332.783	1947.78	2584.12	6.12733	6.85942	7.27616	8.04238	10.221	10.7921	NM_018125	chr1:018024301-018024360	ARHGEF10L	Homo sapiens Rho guanine nucleotide exchange factor (GEF) 10-like (ARHGEF10L), transcript variant 1, mRNA [NM_018125]	GO:0005622|GO:0005085|GO:0005737|GO:0035023|GO:0005089	NM_018125	Hs.443460	55160	ENST00000375408
A_23_P90601	0.00449806	1.76127	up	966.419	546.438	8.9201	8.10348	185.071	351.673	57.8761	339.395	1396.37	2208.19	7.22615	8.13478	7.34469	8.06324	9.7396	10.5623	NM_182915	chr2:120022998-120023057	STEAP3	Homo sapiens STEAP family member 3 (STEAP3), transcript variant 1, mRNA [NM_182915]	GO:0000293|GO:0005506|GO:0005886|GO:0005507|GO:0050660|GO:0006915|GO:0009055|GO:0046872|GO:0007049|GO:0005488|GO:0016491|GO:0006826|GO:0016021|GO:0055114|GO:0005768|GO:0006811	NM_182915	Hs.647822	55240	ENST00000393110
A_23_P205489	0.0347278	1.63559	up	1371.27	1003.18	9.10598	8.39617	135.884	242.222	65.2975	451.557	2808.35	3420.04	6.83146	7.64234	7.57443	8.4521	10.7826	11.2235	NM_182728	chr14:023594713-023594654	SLC7A8	Homo sapiens solute carrier family 7 (cationic amino acid transporter, y+ system), member 8 (SLC7A8), transcript variant 2, mRNA [NM_182728]	GO:0005515|GO:0006520|GO:0019534|GO:0005886|GO:0009636|GO:0015101|GO:0055065|GO:0015804|GO:0005737|GO:0005887|GO:0042605|GO:0015175|GO:0015179|GO:0015807	NM_182728	Hs.596643	23428	ENST00000449867	NP1163457
A_33_P3234521	0.046706	1.66203	up	155.261	72.2502	6.86869	6.13575	125.896	229.111	29.4497	108.179	61.4053	128.494	6.72738	7.57133	6.09576	6.50552	5.58411	6.52924	AK095407	chr15:66618821-66618880	DIS3L	Homo sapiens cDNA FLJ38088 fis, clone CTONG2020031, weakly similar to Mitotic control protein dis3. [AK095407]	GO:0004527|GO:0016787|GO:0003723|GO:0004540		Hs.446251	115752
A_33_P3231645	0.0192873	1.73691	up	95.8664	42.5932	6.26354	5.46701	64.5179	122.85	21.3734	81.5555	41.8882	83.1937	5.79839	6.72148	5.5373	6.10996	5.06535	5.95918	XM_001714404	chr12:000861042-000860983	LOC100132369	PREDICTED: Homo sapiens hypothetical LOC100132369 (LOC100132369), mRNA [XM_001714404]		XM_001714404	Hs.719460	100132369
A_33_P3292495	0.0355532	2.12084	up	115.385	48.3563	6.52428	5.43964	73.945	127.295	14.0176	93.8477	57.1062	125.013	6.00246	6.76527	4.83342	6.31311	5.48304	6.49444	AK096395	chr12:6692199-6692258	LOC100127974	Homo sapiens cDNA FLJ39076 fis, clone NT2RP7017567 [AK096395]			Hs.617756	100127974
A_33_P3237487	0.0323341	1.87369	up	152.823	66.21	6.82108	5.9152	100.105	235.535	19.7305	96.8072	78.7946	126.127	6.43375	7.60612	5.40672	6.35364	5.90513	6.50348	AK123475	chr2:19167831-19167772	FLJ41481	Homo sapiens cDNA FLJ41481 fis, clone BRTHA2002721 [AK123475]			Hs.502854	400945
A_33_P3336968	0.00316621	1.51299	up	730.965	370.827	8.99215	8.39475	677.073	896.454	113.251	807.331	322.156	489.11	8.85551	9.38908	8.60145	9.24949	7.72729	8.33788	NM_182916	chr3:003170812-003170871	TRNT1	Homo sapiens tRNA nucleotidyl transferase, CCA-adding, 1 (TRNT1), mRNA [NM_182916]	GO:0005739|GO:0005622|GO:0006396|GO:0000287|GO:0000049|GO:0000166|GO:0006626|GO:0016779|GO:0004810|GO:0005524|GO:0042780|GO:0016740	NM_182916	Hs.567495	51095	ENST00000339437
A_33_P3396275	0.0409671	1.82404	up	353.024	186.576	7.97212	7.10498	306.909	452.954	31.4639	213.988	221.354	392.13	7.85978	8.45867	6.2181	7.43019	7.23706	8.02749	NM_001130448	chr15:041063123-041063182	C15orf62	Homo sapiens chromosome 15 open reading frame 62 (C15orf62), mRNA [NM_001130448]	GO:0005739	NM_001130448	Hs.631715	643338	ENST00000344320
A_33_P3326822	0.0261815	1.98171	up	188.281	80.0486	7.1948	6.20805	130.975	213.512	25.7294	169.581	83.4411	181.751	6.78106	7.48017	5.8619	7.12489	5.98119	6.97934		chr7:030739747-030739806
A_23_P57007	0.00533039	1.77338	up	88.7538	38.6805	6.1805	5.354	54.2175	94.8835	20.8074	87.331	41.0164	84.0468	5.53643	6.35851	5.48943	6.21328	5.03613	5.96971	XM_001721104	chr20:039665854-039665795	PRO0628	PREDICTED: Homo sapiens uncharacterized protein PRO0628-like (LOC100127886), mRNA [XM_001721104]		XM_001721104		100127886
A_23_P500206	0.0205614	1.65909	up	400.748	197.3	8.19198	7.46158	308.964	457.801	54.868	297.629	228.069	446.815	7.86709	8.47064	7.2437	7.88959	7.27395	8.2157	NM_153483	chr3:009957731-009957790	IL17RE	Homo sapiens interleukin 17 receptor E (IL17RE), transcript variant 5, mRNA [NM_153483]	GO:0005737|GO:0016020|GO:0005576|GO:0004872|GO:0016021	NM_153483	Hs.390823	132014	ENST00000448654
A_33_P3345549	0.0366057	1.64307	up	48.756	26.1522	5.33435	4.61795	38.3642	49.4098	9.10369	41.4727	30.9885	55.3855	4.97738	5.43906	4.20251	5.15092	4.67396	5.41306	NM_024884	chr14:050709230-050709171	L2HGDH	Homo sapiens L-2-hydroxyglutarate dehydrogenase (L2HGDH), nuclear gene encoding mitochondrial protein, mRNA [NM_024884]	GO:0005739|GO:0016491|GO:0031305|GO:0047545|GO:0016021|GO:0044267|GO:0055114	NM_024884	Hs.256034	79944
A_33_P3412560	0.00618242	1.95647	up	2057.93	1069.38	10.2622	9.29393	1028.75	1969.22	88.9117	692.622	2090.48	3511.94	9.38459	10.4996	8.16978	9.02733	10.3274	11.2596		chr3:141720858-141720917		Putative uncharacterized protein ENSP00000381076 Fragment [Source:UniProtKB/TrEMBL;Acc:A8MTB2] [ENST00000397989]					ENST00000397989
A_33_P3382331	0.0237894	2.02103	up	384.948	186.172	7.96934	6.95425	91.1136	189.08	35.8628	265.162	431.539	700.603	6.30288	7.32156	6.44706	7.73647	8.1128	8.84998	NM_002155	chr1:161576964-161577023	HSPA6	Homo sapiens heat shock 70kDa protein 6 (HSP70B') (HSPA6), mRNA [NM_002155]	GO:0006986|GO:0000166|GO:0005524	NM_002155	Hs.654614	3310	ENST00000309758
A_33_P3215575	0.030035	1.572	up	295.787	210.65	6.79992	6.14733	27.5039	41.5965	20.7781	90.6966	583.668	755.068	4.42753	5.18602	5.48639	6.26427	8.52806	8.94949	NM_018125	chr1:018024085-018024144	ARHGEF10L	Homo sapiens Rho guanine nucleotide exchange factor (GEF) 10-like (ARHGEF10L), transcript variant 1, mRNA [NM_018125]	GO:0005622|GO:0005085|GO:0005737|GO:0035023|GO:0005089	NM_018125	Hs.443460	55160	ENST00000375415
A_24_P11061	0.0424619	1.94983	up	187.189	69.3599	7.1326	6.16924	103.026	221.909	31.5987	223.859	73.4554	115.799	6.46584	7.52776	6.22556	7.48446	5.81633	6.38556	NM_153478	chrX:151909253-151909312	CSAG1	Homo sapiens chondrosarcoma associated gene 1 (CSAG1), transcript variant a, mRNA [NM_153478]		NM_153478	Hs.423718	158511	ENST00000452779	NP1166054
A_33_P3222451	0.0179503	1.50733	up	41.0985	22.4413	5.06403	4.47204	36.9753	57.4885	10.3957	36.5222	19.9528	29.2847	4.92194	5.6573	4.39006	4.97342	4.10412	4.56137	DA683849	chr19:50381487-50381428		Proline-rich AKT1 substrate 1 (40 kDa proline-rich AKT substrate) [Source:UniProtKB/Swiss-Prot;Acc:Q96B36] [ENST00000391830]			Hs.628396		ENST00000391830
A_32_P489662	0.0464569	1.75735	up	59.9868	31.6392	5.59718	4.78378	30.359	54.5872	10.0486	47.7336	54.5099	77.6397	4.58667	5.57733	4.34448	5.34401	5.4202	5.87021	NM_181535		KRT28	Homo sapiens keratin 28 (KRT28), mRNA [NM_181535]	GO:0005882|GO:0005737|GO:0005198	NM_181535	Hs.59736	162605	ENST00000306658
A_32_P115375	0.0491167	2.66584	up	1548.24	630.181	10.0642	8.64956	1200.66	2012.64	70.9364	1181	618.947	1451.08	9.6049	10.5299	7.73678	9.76807	8.60702	9.89453		chr16:051680116-051680057
A_33_P3412294	0.0454844	1.58533	up	594.721	326.325	8.54105	7.87627	363.951	633.452	50.1929	217.791	564.831	932.919	8.06652	8.91685	7.07607	7.45094	8.48623	9.25536	NM_181877	chr6:042964210-042964151	ZSCAN2	Homo sapiens zinc finger and SCAN domain containing 2 (ZSCAN2), transcript variant 1, mRNA [NM_181877]	GO:0005622|GO:0006355|GO:0003700|GO:0008270|GO:0007275|GO:0005634|GO:0007283|GO:0046872|GO:0030154	NM_181877	Hs.594023	54993	ENST00000401003
A_23_P63897	0.0152677	1.51229	up	2082.53	1464.84	10.2476	9.65083	1666.45	2384.03	90.6291	584.811	2637.44	3278.76	10.0566	10.7871	8.20591	8.79288	10.69	11.1627	NM_022802	chr10:126677529-126677470	CTBP2	Homo sapiens C-terminal binding protein 2 (CTBP2), transcript variant 2, mRNA [NM_022802]	GO:0005515|GO:0016564|GO:0048037|GO:0008285|GO:0030054|GO:0045202|GO:0005634|GO:0019079|GO:0016616|GO:0051287|GO:0050872|GO:0017053|GO:0016491|GO:0055114	NM_022802	Hs.501345	1488	ENST00000337195
A_33_P3309429	0.0368747	1.51493	up	419.985	231.516	8.21816	7.61891	182.12	326.228	62.2422	304.672	450.187	629.053	7.20522	8.03693	7.47783	7.92202	8.17369	8.69554	BC039333	chr7:23234444-23234503	NUPL2	Homo sapiens nucleoporin like 2, mRNA (cDNA clone IMAGE:5267926), complete cds. [BC039333]	GO:0016020|GO:0005643|GO:0006611|GO:0005049|GO:0008270|GO:0005634|GO:0051028|GO:0015031|GO:0003676|GO:0055085|GO:0046872|GO:0005829		Hs.408241	11097	ENST00000366347
A_33_P3348519	0.00538647	1.50942	up	349.05	165.26	7.70871	7.11471	56.6334	90.0632	75.2285	431.489	363.919	525.597	5.61084	6.29228	7.84586	8.39245	7.88744	8.44141	AK126629	chr11:71729219-71729278	LOC100128494	Homo sapiens cDNA FLJ44668 fis, clone BRACE3004981. [AK126629]			Hs.713607	100128494		NP851372
A_23_P434809	0.0201326	2.39577	up	4861.4	2553.23	10.1905	8.93004	83.6246	208.052	95.7784	1268.63	7480.29	13107.5	6.18314	7.44859	8.30426	9.87679	12.3027	13.2462	NM_002964	chr1:153362607-153362548	S100A8	Homo sapiens S100 calcium binding protein A8 (S100A8), mRNA [NM_002964]	GO:0005515|GO:0006954|GO:0005509	NM_002964	Hs.416073	6279	ENST00000368733
Test 4 (PBMC + HIV-2 ROD Day 7) vs Control 1 (No virus control day 7) 1.5 fold down regulated genes
	P-value	Fold change and Regulation		Group--Raw Intensity		Group--Normalized Intensity		Raw Intensity						Normalized Intensity						Annotations
ProbeName	P-value	FCAbsolute	regulation	Test 4(raw)	Control 1(raw)	Test 4(normalized)	Control 1(normalized)	[22-17, Control 1](raw)	[22-47, Test 4](raw)	[43-17, Control 1](raw)	[43-47, Test 4](raw)	[P1-7, Control 1](raw)	[P4-7, Test 4](raw)	[22-17, Control 1](normalized)	[22-47, Test 4](normalized)	[43-17, Control 1](normalized)	[43-47, Test 4](normalized)	[P1-7, Control 1](normalized)	[P4-7, Test 4](normalized)	GenbankAccession	GenomicCoordinates	GeneSymbol	Description	Go	RefSeqAccession	UniGeneID	EntrezGeneID	EnsemblID	TIGRID
A_24_P381136	0.0160966	1.6043	down	82.9959	99.9649	6.09049	6.77243	130.894	79.4927	51.4593	91.8735	117.542	77.6213	6.77997	6.12093	7.12429	6.28051	6.41303	5.87003	NM_016223		PACSIN3	Homo sapiens protein kinase C and casein kinase substrate in neurons 3 (PACSIN3), mRNA [NM_016223]	GO:0008092|GO:0051044|GO:0005737|GO:0005886|GO:0045806	NM_016223	Hs.334639	29763	ENST00000298838
A_23_P12053	0.0140871	1.82499	down	437.024	581.513	8.32775	9.19563	747.44	376.384	206.121	503.58	790.977	431.109	8.97008	8.22512	9.66358	8.58868	8.95324	8.16943	NM_015001	chr1:016266686-016266745	SPEN	Homo sapiens spen homolog, transcriptional regulator (Drosophila) (SPEN), mRNA [NM_015001]	GO:0005515|GO:0007219|GO:0000166|GO:0044419|GO:0003723|GO:0005730|GO:0016481|GO:0005634|GO:0003677	NM_015001	Hs.558463	23013	ENST00000375759
A_33_P3334590	0.044947	1.55002	down	51.687	58.734	5.392	6.02428	72.9816	53.2368	33.8922	65.1747	69.3284	36.6494	5.97897	5.54696	6.3472	5.78119	5.74667	4.84784	NM_017762	chr15:031260183-031260124	MTMR10	Homo sapiens myotubularin related protein 10 (MTMR10), mRNA [NM_017762]	GO:0016791|GO:0016311	NM_017762	Hs.30141	54893	ENST00000340566
A_23_P397376	0.0242785	1.61391	down	5555.21	8008.65	11.9908	12.6813	14110.9	7018.8	1260.07	3846.54	8654.95	5800.3	13.2015	12.4036	12.3257	11.5232	12.5168	12.0454	NM_001031804	chr16:079628317-079628258	MAF	Homo sapiens v-maf musculoaponeurotic fibrosarcoma oncogene homolog (avian) (MAF), transcript variant 2, mRNA [NM_001031804]	GO:0043565|GO:0006355|GO:0003700|GO:0006366|GO:0003702|GO:0005634|GO:0000785	NM_001031804	Hs.134859	4094	ENST00000393350
A_23_P114466	0.0267251	1.54722	down	214.626	222.777	7.30223	7.93191	324.403	162.422	111.79	319.606	232.139	161.851	7.9252	7.09744	8.57448	7.98317	7.29603	6.82608	NM_033284	chrY:006955393-006955452	TBL1Y	Homo sapiens transducin (beta)-like 1Y-linked (TBL1Y), transcript variant 1, mRNA [NM_033284]	GO:0019941|GO:0005634|GO:0045449	NM_033284	Hs.664560	90665	ENST00000383032	NP447325
A_33_P3884179	0.0347415	2.27695	down	385.007	548.226	7.97394	9.16104	960.032	250.644	283.094	689.73	401.553	214.647	9.28721	7.69211	10.1761	9.01961	8.01984	7.2101	AK057596	chr2:96479923-96479864	LOC150759	Homo sapiens cDNA FLJ33034 fis, clone THYMU2000236 [AK057596]			Hs.651352	150759
A_33_P3401058	0.02638	1.69344	down	52.0915	70.8852	5.40989	6.16985	78.3764	49.9971	30.5121	41.6162	103.767	64.6611	6.08098	5.45474	6.16684	5.15518	6.26174	5.61977	AK022140	chr5:93198713-93198654		Homo sapiens cDNA FLJ12078 fis, clone HEMBB1002457. [AK022140]
A_24_P945096	0.00873703	1.60847	down	371.099	399.023	7.9753	8.66099	287.655	165.808	172.387	484.049	737.026	463.441	7.78748	7.12366	9.3455	8.53875	8.84998	8.26349	NM_021096	chr22:040085423-040085482	CACNA1I	Homo sapiens calcium channel, voltage-dependent, T type, alpha 1I subunit (CACNA1I), transcript variant 1, mRNA [NM_021096]	GO:0005515|GO:0007165|GO:0005244|GO:0016020|GO:0008332|GO:0005509|GO:0006816|GO:0016021|GO:0055085|GO:0005891|GO:0006811	NM_021096	Hs.125116	8911	ENST00000336649
A_33_P3252322	0.0456817	1.7505	down	174.292	136.945	6.60665	7.41441	183.423	75.6918	128.964	387.196	98.4482	59.988	7.21467	6.05169	8.83741	8.24337	6.19116	5.5249	AK000470	chrX:3811034-3810975	LOC286434	Homo sapiens cDNA FLJ20463 fis, clone KAT06143 [AK000470]			Hs.657302	286434
A_33_P3237266	0.0438686	1.88604	down	58.8721	64.9573	5.43881	6.35417	69.0129	39.5652	71.1487	102.633	54.7102	34.4183	5.89206	5.11518	7.74308	6.43662	5.42738	4.76465	XM_001713869	chrX:148584661-148584602		Iduronate 2-sulfatase Precursor (EC 3.1.6.13)(Alpha-L-iduronate sulfate sulfatase)(Idursulfase) [Contains Iduronate 2-sulfatase 42 kDa chain;Iduronate 2-sulfatase 14 kDa chain] [Source:UniProtKB/Swiss-Prot;Acc:P22304] [ENST00000428056]		XM_001713869			ENST00000428056
A_24_P215882	0.0392838	1.73242	down	84.2142	110.344	6.10841	6.9012	150.75	88.0372	54.6844	82.8908	125.597	81.7148	6.96337	6.25982	7.23706	6.13002	6.50316	5.93539	NM_001176		ARHGDIG	Homo sapiens Rho GDP dissociation inhibitor (GDI) gamma (ARHGDIG), mRNA [NM_001176]	GO:0007162|GO:0005737|GO:0016023|GO:0007266|GO:0005094|GO:0005096	NM_001176	Hs.647388	398	ENST00000414650	NP1457959
A_23_P136405	0.0108529	1.7634	down	2890.37	4370.65	10.9194	11.7378	7945.01	4413.94	610.054	1830.13	4556.89	2427.03	12.3308	11.6703	11.3502	10.3939	11.5324	10.6942	NM_005018	chr2:242792108-242792049	PDCD1	Homo sapiens programmed cell death 1 (PDCD1), mRNA [NM_005018]	GO:0005515|GO:0005886|GO:0006959|GO:0006915|GO:0007275|GO:0016021|GO:0004871|GO:0009897	NM_005018	Hs.158297	5133	ENST00000334409
A_23_P64980	0.0426516	1.72684	down	52.3525	69.2861	5.44139	6.22952	86.897	57.198	35.8221	46.9507	85.1393	52.9089	6.23731	5.64972	6.44464	5.32234	6.0066	5.3521	NM_016615	chr12:000330018-000329959	SLC6A13	Homo sapiens solute carrier family 6 (neurotransmitter transporter, GABA), member 13 (SLC6A13), mRNA [NM_016615]	GO:0016020|GO:0005887|GO:0005328|GO:0006836|GO:0042165|GO:0005332|GO:0015293	NM_016615	Hs.504398	6540	ENST00000313154
A_33_P3364641	0.0208706	1.55481	down	110.623	104.488	6.32035	6.95709	154.189	86.8982	80.5378	188.009	78.7377	56.9627	6.99246	6.24245	7.97526	7.26639	5.90355	5.45221	AK124207	chr19:42749066-42749125		Putative uncharacterized protein FLJ42213 [Source:UniProtKB/Swiss-Prot;Acc:Q6ZVQ6] [ENST00000378108]			Hs.711405		ENST00000378108
A_33_P3846114	0.0456927	1.90072	down	271.294	322.233	7.20773	8.13428	123.183	49.8582	133.775	303.856	709.742	460.167	6.70166	5.45097	8.90176	7.91942	8.79942	8.25282	AK093678	chrX:39164269-39164210	LOC286442	Homo sapiens cDNA FLJ36359 fis, clone THYMU2007528 [AK093678]			Hs.638478	286442
A_23_P9523	0.0342721	1.70173	down	1502.18	2123.81	10.0539	10.8209	3703.16	1574.37	436.909	1438.93	2231.37	1493.25	11.1722	10.1844	10.8573	10.0358	10.4333	9.94154	NM_022128	chr2:028004544-028004485	RBKS	Homo sapiens ribokinase (RBKS), mRNA [NM_022128]	GO:0000166|GO:0016301|GO:0005975|GO:0004747|GO:0005524|GO:0016740|GO:0006014	NM_022128	Hs.11916	64080	ENST00000449378	NP1159617
A_33_P3327697	0.028425	2.12052	down	76.632	103.623	5.85155	6.93596	111.408	41.1878	68.9727	114.538	130.49	74.1701	6.57166	5.17032	7.68006	6.58267	6.55617	5.80166	NR_027046	chr14:071956365-071956424	LOC145474	Homo sapiens hypothetical protein LOC145474 (LOC145474), non-coding RNA [NR_027046]		NR_027046		145474
A_33_P3226237	0.00204551	1.80704	down	34.2966	53.2244	4.80876	5.66239	68.4662	38.019	18.5462	24.1061	72.6608	40.7646	5.88062	5.06109	5.30461	4.37383	5.80193	4.99137	XM_002342287	chr2:204193090-204193031	LOC100288412	PREDICTED: Homo sapiens hypothetical protein LOC100288412 (LOC100288412), mRNA [XM_002342287]		XM_002342287	Hs.710378	100288412
A_33_P3379396	0.0209227	2.16176	down	2006.72	3602.74	9.08027	10.1925	9652.78	3188.49	1079.49	2790.5	75.9529	41.1677	12.6158	11.2031	12.1051	11.0317	5.85647	5.00598	NM_006121	chr12:053068579-053068520	KRT1	Homo sapiens keratin 1 (KRT1), mRNA [NM_006121]	GO:0005515|GO:0008544|GO:0005886|GO:0005529|GO:0005200|GO:0045765|GO:0004872|GO:0045095|GO:0005856|GO:0042730|GO:0006979|GO:0001867	NM_006121	Hs.80828	3848	ENST00000252244
A_33_P3359832	0.0161964	2.31541	down	38.1172	76.5449	4.90878	6.12005	44.1508	20.5783	35.2897	45.535	150.194	48.2385	5.2028	4.22038	6.42144	5.27954	6.73592	5.22644		chr15:028814365-028814306
A_32_P105549	0.0442713	1.83833	down	469.036	1163.48	7.70447	8.58286	3168.45	1130.87	56.9952	109.315	264.993	166.927	10.9635	9.72217	7.31994	6.51858	7.46513	6.87265	NM_001630	chr10:047158065-047158006	ANXA8L2	Homo sapiens annexin A8-like 2 (ANXA8L2), mRNA [NM_001630]	GO:0005544|GO:0005509	NM_001630	Hs.705389	244	ENST00000344416
A_23_P202427	0.0288846	1.55779	down	147.036	143.745	6.74434	7.38385	206.634	106.355	89.8194	240.6	134.782	94.1543	7.36752	6.5173	8.18819	7.59294	6.59582	6.12278	NM_025130	chr10:071026958-071027017	HKDC1	Homo sapiens hexokinase domain containing 1 (HKDC1), mRNA [NM_025130]	GO:0005739|GO:0000166|GO:0016301|GO:0005975|GO:0005730|GO:0005634|GO:0004396|GO:0005524|GO:0016740|GO:0006096	NM_025130	Hs.522988	80201	ENST00000354624	NP1072686
A_33_P3628409	0.0462315	1.70512	down	539.072	687.29	8.48421	9.25408	1436.95	715.589	252.751	646.107	372.174	255.519	9.84421	9.07694	9.9994	8.93112	7.91863	7.44456	AK125369	chr2:217084790-217084849		Putative uncharacterized protein DKFZp434H1419 Fragment [Source:UniProtKB/TrEMBL;Acc:Q9NT46] [ENST00000447029]			Hs.56876		ENST00000447029
A_23_P216108	0.000362266	1.80131	down	689.12	966.817	8.86618	9.71522	792.538	359.189	243.269	731.062	1864.64	977.109	9.04477	8.16342	9.94306	9.11131	10.1578	9.32379	NM_000037	chr8:041513128-041513069	ANK1	Homo sapiens ankyrin 1, erythrocytic (ANK1), transcript variant 3, mRNA [NM_000037]	GO:0005886|GO:0030507|GO:0014731|GO:0006887|GO:0045199|GO:0031430|GO:0007165|GO:0016323|GO:0005737|GO:0016529|GO:0007010|GO:0005200|GO:0019899|GO:0008093	NM_000037	Hs.654438	286	ENST00000314214	NP1475647
A_32_P156851	0.0422369	1.96806	down	169.297	406.824	6.36974	7.34652	1013.61	361.123	23.1222	26.3981	183.737	120.37	9.36265	8.1712	5.67571	4.49895	7.00119	6.43907	NM_005822	chr6:046188566-046188508	RCAN2	Homo sapiens regulator of calcineurin 2 (RCAN2), mRNA [NM_005822]	GO:0030346|GO:0019722|GO:0005575|GO:0007417	NM_005822	Hs.440168	10231	ENST00000371374
A_33_P3256793	0.00909891	1.88407	down	5559.64	8767.23	11.8119	12.7258	4305.56	2125.5	2163.61	5640.05	19832.5	8913.36	11.3943	10.6127	13.0178	12.1378	13.7652	12.6853	NM_020775	chr1:109745792-109745851	KIAA1324	Homo sapiens KIAA1324 (KIAA1324), mRNA [NM_020775]	GO:0005515|GO:0008150|GO:0003674|GO:0016020|GO:0016021|GO:0005575	NM_020775	Hs.708190	57535	ENST00000369938
A_33_P3305203	0.0360273	2.08305	down	169.497	264.027	6.99392	8.05261	289.611	122.382	96.9744	247.761	405.495	138.349	7.79659	6.71665	8.32774	7.63699	8.03352	6.62812	XR_041539	chr14:091314296-091314237	LOC283588	PREDICTED: Homo sapiens hypothetical LOC283588 (LOC283588), miscRNA [XR_041539]		XR_041539	Hs.46519	283588
A_24_P822692	0.0426499	2.24727	down	50.4663	80.2587	5.36554	6.53371	106.774	39.0644	50.9708	61.0978	83.0309	51.2367	6.51858	5.09691	7.10698	5.69373	5.97557	5.30596	XM_933621	chr19:039399780-039399721	LOC643669	PREDICTED: Homo sapiens similar to mCG2980, transcript variant 1 (LOC643669), mRNA [XM_933621]		XM_933621	Hs.355357	643669
A_33_P3263432	0.0447411	1.57413	down	158.938	162.387	6.77113	7.42569	298.844	163.415	108.67	252.751	79.6461	60.6465	7.83166	7.10637	8.52587	7.66614	5.91953	5.54088	NM_003637	chr1:145543808-145543867	ITGA10	Homo sapiens integrin, alpha 10 (ITGA10), mRNA [NM_003637]	GO:0008305|GO:0000287|GO:0007160|GO:0005886|GO:0007229|GO:0005518|GO:0005509|GO:0004872|GO:0016021|GO:0007155	NM_003637	Hs.158237	8515	ENST00000369304
A_33_P3390570	0.0352671	1.58847	down	4990.12	5386.8	11.8345	12.5021	6882.5	4217.64	2666.74	6558.88	6611.17	4193.85	12.107	11.6071	13.2778	12.357	12.1216	11.5393	NM_005933	chr11:118348856-118348915	MLL	Homo sapiens myeloid/lymphoid or mixed-lineage leukemia (trithorax homolog, Drosophila) (MLL), mRNA [NM_005933]	GO:0006355|GO:0003700|GO:0008285|GO:0003702|GO:0008168|GO:0006915|GO:0009952|GO:0042800|GO:0046872|GO:0042803|GO:0006306|GO:0035097|GO:0006461|GO:0045944|GO:0044428|GO:0003682|GO:0008270|GO:0051569|GO:0035162|GO:0016740|GO:0016568	NM_005933	Hs.258855	4297	ENST00000389507	NP288430
A_33_P3258265	0.0441159	1.88762	down	42.9199	61.1172	5.1373	6.05387	56.6002	34.6158	36.2187	41.4818	90.5327	52.6621	5.61004	4.91617	6.46538	5.15145	6.0862	5.34429	NM_030913	chr1:151108994-151108935	SEMA6C	Homo sapiens sema domain, transmembrane domain (TM), and cytoplasmic domain, (semaphorin) 6C (SEMA6C), mRNA [NM_030913]	GO:0016020|GO:0007275|GO:0004872|GO:0016021|GO:0030154|GO:0007399	NM_030913	Hs.516316	10500	ENST00000392791
A_33_P3231352	0.0341088	1.5691	down	86.9213	102.119	6.11358	6.76352	155.812	80.5206	49.9931	117.817	100.551	62.426	7.00621	6.13897	7.06625	6.62558	6.2181	5.5762	XM_001715381	chr4:140335114-140335055	LOC729350	PREDICTED: Homo sapiens hypothetical LOC729350 (LOC729350), mRNA [XM_001715381]		XM_001715381	Hs.289059	729350
A_23_P31765	0.0392778	1.51337	down	2293.87	2436.41	10.6014	11.1991	2512.62	1252.23	723.568	3189.81	4073.03	2439.57	10.6434	9.87493	11.5877	11.2265	11.3663	10.7027	NM_006823	chr8:079515306-079515365	PKIA	Homo sapiens protein kinase (cAMP-dependent, catalytic) inhibitor alpha (PKIA), transcript variant 6, mRNA [NM_006823]	GO:0005737|GO:0010389|GO:0042308|GO:0004860|GO:0005634|GO:0005625|GO:0006469|GO:0004862|GO:0000122|GO:0043086	NM_006823	Hs.433700	5569	ENST00000396418
A_23_P100001	0.0351019	1.57889	down	295.988	357.321	7.81183	8.47073	470.199	298.277	125.126	297.199	476.639	292.487	8.37172	7.91942	8.77762	7.88801	8.26286	7.62805	NM_207446	chr15:093160848-093160789	FAM174B	Homo sapiens family with sequence similarity 174, member B (FAM174B), mRNA [NM_207446]	GO:0016020|GO:0016021	NM_207446	Hs.27373	400451	ENST00000327355
A_33_P3387771	0.00460227	1.51977	down	263.111	242.387	7.49686	8.10072	225.386	133.535	135.878	435.131	365.898	220.668	7.48394	6.8439	8.92278	8.40095	7.89545	7.24575	NM_001039590	chrX:041095755-041095814	USP9X	Homo sapiens ubiquitin specific peptidase 9, X-linked (USP9X), transcript variant 3, mRNA [NM_001039590]	GO:0005515|GO:0006511|GO:0016579|GO:0070410|GO:0007292|GO:0030509|GO:0004197|GO:0005737|GO:0007049|GO:0007067|GO:0007059|GO:0007179|GO:0008233|GO:0004221|GO:0051301	NM_001039590	Hs.77578	8239
A_33_P3211864	0.0406096	1.5496	down	64.5315	75.0212	5.61118	6.24308	44.0573	32.0243	46.848	81.4689	134.158	80.1012	5.19738	4.81236	6.9411	6.10788	6.59075	5.9133	NR_028407	chrX:100788387-100788446	ARMCX4	Homo sapiens armadillo repeat containing, X-linked 4 (ARMCX4), non-coding RNA [NR_028407]	GO:0016020|GO:0016021	NR_028407	Hs.709762	100131755
